# Supplementary material for: PDZ Binding Kinase/T-LAK Cell-Derived Protein Kinase Plays an Oncogenic Role and Promotes Immune Escape in Human Tumors
Source: J Oncol. 2021 Sep 23;2021:8892479. doi: 10.1155/2021/8892479 (PMC8486520; doi:10.1155/2021/8892479)
Supplement: Supplementary Materials — Table S1: expression comparison of PBK/TOPK expression in tumor and normal tissues across cancers from TCGA and GTEx. Table S2: the correlation of PBK/TOPK expression with immune cells in TIMER2.0. Table S3: the correlation of PBK/TOPK expression with TMB across cancers from TCGA. Table S4: the correlation of PBK/TOPK expression with MSI across cancers from TCGA. Table S5: the correlation of PBK/TOPK expression with the expression of immune checkpoints genes across cancers from TCGA. Table S6: analysis of the correlation between PBK/TOPK expression and the immune response based on TIDE in KRIC, LGG, and LIHC. Table S7: the correlations of PBK/TOPK with DNA mismatch genes and methyltransferases. Table S8: similar genes of PBK/TOPK from GEPIA2. Table S9: the correlation of PBK/TOPK with top 5 similar genes from GEPIA2. Table S10: the result of Venn. Table S11: the GO and KEGG enrichment analysis of PBK/TOPK-related differentially genes in KIRC. Table S12: the GO and KEGG enrichment analysis of PBK/TOPK-related differentially genes in LGG. Table S13: the GO and KEGG enrichment analysis of PBK/TOPK-related differentially genes in LIHC. Table S14: Gene_outcome of PBK in the TIMER2.0 database. Figure S1: PBK mRNA expression based on the pathological stage and tumor grade of other cancers in TCGA. Click the link to download the supplements: (https://pan.baidu.com/s/1GFqYHhkAK0Y_34zLnH049g) (password 1234). [file 8892479.f1.zip › 8892479.f1/Table S1.txt]

group1	group2	Numbers	minimum	maxmum	Median	IQR	Lower quartile	upperer quartile	Mean	SD	SE
BLCA	Normal	19	0	4.101	0.956	1.899	0.417	2.316	1.302	1.208	0.277
BLCA	Tumor	19	1.766	4.858	2.991	1.462	2.461	3.923	3.104	0.929	0.213
BRCA	Normal	112	0.029	3.578	0.816	0.852	0.441	1.293	0.946	0.616	0.058
BRCA	Tumor	112	0.651	5.646	3.184	1.716	2.355	4.071	3.165	1.201	0.113
CHOL	Normal	9	0	0.287	0.151	0.145	0.057	0.202	0.138	0.108	0.036
CHOL	Tumor	9	1.104	4.864	2.563	1.128	1.856	2.984	2.547	1.087	0.362
COAD	Normal	26	1.305	3.79	2.962	0.668	2.565	3.233	2.87	0.583	0.114
COAD	Tumor	26	1.795	5.211	3.606	1.022	3.139	4.161	3.701	0.878	0.172
ESCA	Normal	13	0.084	3.025	1.131	1.92	0.263	2.183	1.429	1.121	0.311
ESCA	Tumor	13	2.63	5.151	3.95	0.93	3.461	4.391	3.932	0.784	0.217
HNSC	Normal	43	0.014	3.458	2.599	1.507	1.376	2.882	2.197	0.952	0.145
HNSC	Tumor	43	1.864	4.639	3.259	0.937	2.879	3.816	3.305	0.661	0.101
KICH	Normal	25	0.189	2.365	0.379	0.308	0.287	0.595	0.543	0.455	0.091
KICH	Tumor	25	0.214	5.306	0.824	0.875	0.536	1.411	1.297	1.257	0.251
KIRC	Normal	72	0.07	3.626	0.401	0.256	0.275	0.531	0.544	0.573	0.068
KIRC	Tumor	72	0.485	3.709	1.307	0.704	1	1.704	1.42	0.619	0.073
KIRP	Normal	32	0.07	1.098	0.31	0.207	0.223	0.43	0.388	0.249	0.044
KIRP	Tumor	32	0.151	3.599	1.235	1.514	0.495	2.01	1.369	0.991	0.175
LIHC	Normal	50	0	0.926	0.176	0.3	0.098	0.398	0.266	0.256	0.036
LIHC	Tumor	50	0.202	4.613	1.569	1.339	1.007	2.346	1.813	1.092	0.154
LUAD	Normal	58	0.111	1.895	0.655	0.468	0.428	0.895	0.677	0.36	0.047
LUAD	Tumor	58	0.411	5.069	2.419	1.778	1.559	3.337	2.459	1.221	0.16
LUSC	Normal	50	0.043	2.205	0.556	0.522	0.359	0.881	0.699	0.492	0.07
LUSC	Tumor	50	0.556	5.159	3.707	1.298	3.04	4.339	3.608	0.989	0.14
PAAD	Normal	4	0.642	1.104	1.016	0.217	0.872	1.089	0.945	0.214	0.107
PAAD	Tumor	4	1.438	2.644	1.744	0.347	1.645	1.991	1.892	0.522	0.261
PRAD	Normal	52	0.043	2.84	0.459	0.413	0.272	0.685	0.54	0.453	0.063
PRAD	Tumor	52	0.098	3.437	0.852	0.839	0.609	1.447	1.091	0.723	0.1
READ	Normal	6	2.074	4.392	3.153	0.972	2.507	3.479	3.108	0.845	0.345
READ	Tumor	6	2.731	4.556	3.778	0.941	3.275	4.216	3.719	0.71	0.29
STAD	Normal	33	0.111	3.184	1.88	2.155	0.496	2.651	1.644	1.041	0.181
STAD	Tumor	33	1.057	5.357	3.48	1.426	2.789	4.215	3.495	1.015	0.177
THCA	Normal	59	0.043	2.26	0.345	0.457	0.189	0.646	0.533	0.521	0.068
THCA	Tumor	59	0.138	2.199	0.687	0.638	0.411	1.05	0.772	0.448	0.058
UCEC	Normal	7	0.057	2.31	0.444	0.542	0.252	0.794	0.701	0.766	0.29
UCEC	Tumor	7	2.353	4.842	4.208	1.299	3.257	4.556	3.862	0.968	0.366
