# Supplementary material for: PDZ Binding Kinase/T-LAK Cell-Derived Protein Kinase Plays an Oncogenic Role and Promotes Immune Escape in Human Tumors
Source: J Oncol. 2021 Sep 23;2021:8892479. doi: 10.1155/2021/8892479 (PMC8486520; doi:10.1155/2021/8892479)
Supplement: Supplementary Materials — Table S1: expression comparison of PBK/TOPK expression in tumor and normal tissues across cancers from TCGA and GTEx. Table S2: the correlation of PBK/TOPK expression with immune cells in TIMER2.0. Table S3: the correlation of PBK/TOPK expression with TMB across cancers from TCGA. Table S4: the correlation of PBK/TOPK expression with MSI across cancers from TCGA. Table S5: the correlation of PBK/TOPK expression with the expression of immune checkpoints genes across cancers from TCGA. Table S6: analysis of the correlation between PBK/TOPK expression and the immune response based on TIDE in KRIC, LGG, and LIHC. Table S7: the correlations of PBK/TOPK with DNA mismatch genes and methyltransferases. Table S8: similar genes of PBK/TOPK from GEPIA2. Table S9: the correlation of PBK/TOPK with top 5 similar genes from GEPIA2. Table S10: the result of Venn. Table S11: the GO and KEGG enrichment analysis of PBK/TOPK-related differentially genes in KIRC. Table S12: the GO and KEGG enrichment analysis of PBK/TOPK-related differentially genes in LGG. Table S13: the GO and KEGG enrichment analysis of PBK/TOPK-related differentially genes in LIHC. Table S14: Gene_outcome of PBK in the TIMER2.0 database. Figure S1: PBK mRNA expression based on the pathological stage and tumor grade of other cancers in TCGA. Click the link to download the supplements: (https://pan.baidu.com/s/1GFqYHhkAK0Y_34zLnH049g) (password 1234). [file 8892479.f1.zip › 8892479.f1/Table S2.txt]

cancer	infiltrates	rho	p	adj.p	note
ACC (n=79)	B cell_TIMER	0.007953647	0.946753566	0.97269202
BLCA (n=408)	B cell_TIMER	-0.058218102	0.265295311	0.470938421
BRCA (n=1100)	B cell_TIMER	0.03137431	0.323074042	0.53400668
BRCA-Basal (n=191)	B cell_TIMER	0.001761711	0.981593576	0.984943748
BRCA-Her2 (n=82)	B cell_TIMER	-0.055269875	0.644708679	0.800880347
BRCA-LumA (n=568)	B cell_TIMER	0.028811508	0.513333751	0.703196919
BRCA-LumB (n=219)	B cell_TIMER	-0.014263926	0.844323619	0.91940866
CESC (n=306)	B cell_TIMER	-0.068850066	0.253425992	0.456784098
CHOL (n=36)	B cell_TIMER	-0.262808435	0.127188226	0.295786573
COAD (n=458)	B cell_TIMER	0.125445217	0.037615748	0.128235504
DLBC (n=48)	B cell_TIMER	-0.047632619	0.767433761	0.870756499
ESCA (n=185)	B cell_TIMER	0.008468919	0.910163024	0.955185472
GBM (n=153)	B cell_TIMER	0.031105282	0.718226969	0.847558556
HNSC (n=522)	B cell_TIMER	-0.316364446	6.73E-13	5.77E-11	***
HNSC-HPV- (n=422)	B cell_TIMER	-0.338175936	3.70E-12	2.78E-10	***
HNSC-HPV+ (n=98)	B cell_TIMER	-0.214607858	0.04342678	0.141609066
KICH (n=66)	B cell_TIMER	-0.030914611	0.806871576	0.894866813
KIRC (n=533)	B cell_TIMER	-0.026442396	0.57118987	0.740202856
KIRP (n=290)	B cell_TIMER	0.039487589	0.52775871	0.71479735
LGG (n=516)	B cell_TIMER	0.086156933	0.059803907	0.17941172
LIHC (n=371)	B cell_TIMER	0.385596934	1.13E-13	1.69E-11	***
LUAD (n=515)	B cell_TIMER	-0.237863698	9.05E-08	2.47E-06	***
LUSC (n=501)	B cell_TIMER	0.007965149	0.862252289	0.930488082
MESO (n=87)	B cell_TIMER	0.268775043	0.012873716	0.060345544
OV (n=303)	B cell_TIMER	0.075701776	0.233947397	0.434577208
PAAD (n=179)	B cell_TIMER	0.251168194	0.000920892	0.00789336	**
PCPG (n=181)	B cell_TIMER	0.134479619	0.083151459	0.229911867
PRAD (n=498)	B cell_TIMER	0.02327173	0.636007787	0.795009733
READ (n=166)	B cell_TIMER	-0.09055416	0.395987341	0.60885506
SARC (n=260)	B cell_TIMER	-0.004029285	0.950071895	0.974432713
SKCM (n=471)	B cell_TIMER	-0.01430758	0.760336378	0.870756499
SKCM-Metastasis (n=368)	B cell_TIMER	-0.055222732	0.300143586	0.505859976
SKCM-Primary (n=103)	B cell_TIMER	0.046828077	0.640236509	0.79863182
STAD (n=415)	B cell_TIMER	-0.106988506	0.037347673	0.128049165
TGCT (n=150)	B cell_TIMER	0.397165147	6.34E-07	1.31E-05	***
THCA (n=509)	B cell_TIMER	-0.074920032	0.09830701	0.263322349
THYM (n=120)	B cell_TIMER	0.785715159	2.54E-25	1.53E-22	***
UCEC (n=545)	B cell_TIMER	-0.167279338	0.1192853	0.288593468
UCS (n=57)	B cell_TIMER	0.189972179	0.173045094	0.353150989
UVM (n=80)	B cell_TIMER	-0.091556878	0.428399837	0.637816134
