# Supplementary material for: PDZ Binding Kinase/T-LAK Cell-Derived Protein Kinase Plays an Oncogenic Role and Promotes Immune Escape in Human Tumors
Source: J Oncol. 2021 Sep 23;2021:8892479. doi: 10.1155/2021/8892479 (PMC8486520; doi:10.1155/2021/8892479)
Supplement: Supplementary Materials — Table S1: expression comparison of PBK/TOPK expression in tumor and normal tissues across cancers from TCGA and GTEx. Table S2: the correlation of PBK/TOPK expression with immune cells in TIMER2.0. Table S3: the correlation of PBK/TOPK expression with TMB across cancers from TCGA. Table S4: the correlation of PBK/TOPK expression with MSI across cancers from TCGA. Table S5: the correlation of PBK/TOPK expression with the expression of immune checkpoints genes across cancers from TCGA. Table S6: analysis of the correlation between PBK/TOPK expression and the immune response based on TIDE in KRIC, LGG, and LIHC. Table S7: the correlations of PBK/TOPK with DNA mismatch genes and methyltransferases. Table S8: similar genes of PBK/TOPK from GEPIA2. Table S9: the correlation of PBK/TOPK with top 5 similar genes from GEPIA2. Table S10: the result of Venn. Table S11: the GO and KEGG enrichment analysis of PBK/TOPK-related differentially genes in KIRC. Table S12: the GO and KEGG enrichment analysis of PBK/TOPK-related differentially genes in LGG. Table S13: the GO and KEGG enrichment analysis of PBK/TOPK-related differentially genes in LIHC. Table S14: Gene_outcome of PBK in the TIMER2.0 database. Figure S1: PBK mRNA expression based on the pathological stage and tumor grade of other cancers in TCGA. Click the link to download the supplements: (https://pan.baidu.com/s/1GFqYHhkAK0Y_34zLnH049g) (password 1234). [file 8892479.f1.zip › 8892479.f1/Table S3.txt]

	Samlpe	Type	TMB.score	Genes
1	TCGA-OR-A5J1-01	ACC	0.612349965	1.752377831
2	TCGA-OR-A5J2-01	ACC	0.707967702	3.183213251
3	TCGA-OR-A5J3-01	ACC	0.266852937	2.663763369
4	TCGA-OR-A5J5-01	ACC	9.123970184	3.557542399
5	TCGA-OR-A5J6-01	ACC	0.738166999	0.420815503
6	TCGA-OR-A5J7-01	ACC	1.220359702	6.253392659
7	TCGA-OR-A5J8-01	ACC	2.076470544	4.468142653
8	TCGA-OR-A5J9-01	ACC	0.782212305	4.381657773
9	TCGA-OR-A5JA-01	ACC	12.11331405	5.252436098
10	TCGA-OR-A5JB-01	ACC	7.627525094	4.706396691
11	TCGA-OR-A5JC-01	ACC	0.630537697	4.343982764
12	TCGA-OR-A5JD-01	ACC	0.600082566	1.836798417
13	TCGA-OR-A5JE-01	ACC	1.235856087	5.080936682
14	TCGA-OR-A5JF-01	ACC	1.752297089	1.242220217
15	TCGA-OR-A5JG-01	ACC	0.661295799	4.078649846
16	TCGA-OR-A5JI-01	ACC	0.32770364	0.923510543
17	TCGA-OR-A5JJ-01	ACC	0.491701674	4.813553747
18	TCGA-OR-A5JK-01	ACC	0.595862039	2.790382699
19	TCGA-OR-A5JL-01	ACC	0.293229851	4.423086558
20	TCGA-OR-A5JM-01	ACC	1.408517481	7.19097825
21	TCGA-OR-A5JO-01	ACC	0.34461324	1.981724135
22	TCGA-OR-A5JP-01	ACC	1.688949354	6.13542758
23	TCGA-OR-A5JQ-01	ACC	0.162342037	3.758035062
24	TCGA-OR-A5JR-01	ACC	0.05168695	3.847466507
25	TCGA-OR-A5JS-01	ACC	0.76373379	5.566661951
26	TCGA-OR-A5JT-01	ACC	0.606380601	4.023940851
27	TCGA-OR-A5JV-01	ACC	0.680023877	2.866340583
28	TCGA-OR-A5JW-01	ACC	0.714418981	1.602060001
29	TCGA-OR-A5JX-01	ACC	0.8210386	0.452184497
30	TCGA-OR-A5JY-01	ACC	1.663380235	6.289789101
31	TCGA-OR-A5JZ-01	ACC	0.314150452	4.552877184
32	TCGA-OR-A5K0-01	ACC	1.193196679	5.165336659
33	TCGA-OR-A5K1-01	ACC	0.321545812	4.70386221
34	TCGA-OR-A5K2-01	ACC	1.200471644	4.86958233
35	TCGA-OR-A5K3-01	ACC	0.383369476	2.004991845
36	TCGA-OR-A5K4-01	ACC	5.295008409	6.187081002
37	TCGA-OR-A5K5-01	ACC	2.81315207	4.46457285
38	TCGA-OR-A5K6-01	ACC	0.598415071	2.931052071
39	TCGA-OR-A5K8-01	ACC	0.641042112	2.580317846
40	TCGA-OR-A5K9-01	ACC	3.000619993	6.534771286
41	TCGA-OR-A5KO-01	ACC	0.688692997	6.583736967
42	TCGA-OR-A5KT-01	ACC	0.518724462	3.713276359
43	TCGA-OR-A5KU-01	ACC	0.483544445	2.605962416
44	TCGA-OR-A5KV-01	ACC	0.470212729	2.554444435
45	TCGA-OR-A5KW-01	ACC	0.47729725	4.977654356
46	TCGA-OR-A5KX-01	ACC	0.799181597	3.023149207
47	TCGA-OR-A5KY-01	ACC	0.67572135	5.6267813
48	TCGA-OR-A5KZ-01	ACC	0.680691851	8.102632973
49	TCGA-OR-A5L3-01	ACC	0.564283999	0.303949116
50	TCGA-OR-A5L4-01	ACC	0.606157675	3.868136789
51	TCGA-OR-A5L5-01	ACC	0.246886501	0.775707996
52	TCGA-OR-A5L6-01	ACC	0.909644469	3.689902675
53	TCGA-OR-A5L8-01	ACC	0.343274039	2.90199296
54	TCGA-OR-A5L9-01	ACC	0.160635917	0.433084379
55	TCGA-OR-A5LA-01	ACC	0.1909741	0.742706242
56	TCGA-OR-A5LB-01	ACC	4.997805832	2.302782604
57	TCGA-OR-A5LC-01	ACC	1.053805726	6.515036195
58	TCGA-OR-A5LD-01	ACC	1.216006632	4.150266861
59	TCGA-OR-A5LE-01	ACC	0.581273226	6.009591086
60	TCGA-OR-A5LG-01	ACC	0.366013866	2.73137769
61	TCGA-OR-A5LH-01	ACC	0.209489459	1.348407082
62	TCGA-OR-A5LJ-01	ACC	9.578135747	3.816054904
63	TCGA-OR-A5LK-01	ACC	0.993156241	0.731115987
64	TCGA-OR-A5LL-01	ACC	1.246710343	0.942470402
65	TCGA-OR-A5LM-01	ACC	0.600720827	3.054050411
66	TCGA-OR-A5LN-01	ACC	0.270483448	0.790859237
67	TCGA-OR-A5LO-01	ACC	1.506904159	3.850215072
68	TCGA-OR-A5LP-01	ACC	0.446661532	0.985956448
69	TCGA-OR-A5LR-01	ACC	0.31997488	2.484756818
70	TCGA-OR-A5LS-01	ACC	0.241563152	3.634632256
71	TCGA-OR-A5LT-01	ACC	0.580568162	3.454376232
72	TCGA-OU-A5PI-01	ACC	0.665692785	2.762806978
73	TCGA-P6-A5OF-01	ACC	0.604099757	4.452207993
74	TCGA-PA-A5YG-01	ACC	0.264824898	0.684914903
75	TCGA-PK-A5H8-01	ACC	0.477695977	4.747868826
76	TCGA-PK-A5H9-01	ACC	0.344051709	1.558192591
77	TCGA-PK-A5HA-01	ACC	1.264934929	1.602609024
78	TCGA-PK-A5HB-01	ACC	24.9613519	5.734008878
79	TCGA-2F-A9KO-01	BLCA	13.74905033	3.957835628
80	TCGA-2F-A9KP-01	BLCA	3.878488648	4.472602367
81	TCGA-2F-A9KQ-01	BLCA	1.804207629	4.594091892
82	TCGA-2F-A9KR-01	BLCA	5.924857092	4.304219133
83	TCGA-2F-A9KT-01	BLCA	9.606037901	5.038733319
84	TCGA-2F-A9KW-01	BLCA	2.659478227	3.516266569
85	TCGA-4Z-AA7M-01	BLCA	14.20965922	4.811741308
86	TCGA-4Z-AA7N-01	BLCA	0.310768814	2.749267325
87	TCGA-4Z-AA7O-01	BLCA	4.729283382	4.974990226
88	TCGA-4Z-AA7Q-01	BLCA	6.393041406	2.932063178
89	TCGA-4Z-AA7R-01	BLCA	9.565544321	4.059454797
90	TCGA-4Z-AA7S-01	BLCA	1.69707447	4.688443141
91	TCGA-4Z-AA7W-01	BLCA	14.47092035	3.393317448
92	TCGA-4Z-AA7Y-01	BLCA	7.828122561	5.317035513
93	TCGA-4Z-AA80-01	BLCA	10.9677048	5.092155471
94	TCGA-4Z-AA81-01	BLCA	5.720247249	4.535400847
95	TCGA-4Z-AA82-01	BLCA	2.807970218	5.337800672
96	TCGA-4Z-AA83-01	BLCA	2.26461281	0.880449704
97	TCGA-4Z-AA84-01	BLCA	12.01127483	3.894789846
98	TCGA-4Z-AA86-01	BLCA	5.533461162	4.976069242
99	TCGA-4Z-AA87-01	BLCA	6.835761772	3.987716212
100	TCGA-4Z-AA89-01	BLCA	3.540396011	3.935780162
101	TCGA-5N-A9KI-01	BLCA	4.538852723	2.693679488
102	TCGA-5N-A9KM-01	BLCA	5.796492167	2.433793407
103	TCGA-BL-A13J-01	BLCA	2.628810732	3.820225377
104	TCGA-BL-A3JM-01	BLCA	5.200362517	6.801839664
105	TCGA-BL-A5ZZ-01	BLCA	4.04746779	5.515649613
106	TCGA-BT-A0S7-01	BLCA	1.01897011	5.787510247
107	TCGA-BT-A0YX-01	BLCA	16.19178139	4.851158958
108	TCGA-BT-A20J-01	BLCA	12.29981893	4.255550306
109	TCGA-BT-A20N-01	BLCA	6.639342488	5.718616322
110	TCGA-BT-A20O-01	BLCA	4.603516257	5.629764979
111	TCGA-BT-A20P-01	BLCA	2.589028386	4.059946243
112	TCGA-BT-A20Q-01	BLCA	2.702040388	3.272356869
113	TCGA-BT-A20R-01	BLCA	6.852496729	3.657831781
114	TCGA-BT-A20T-01	BLCA	6.723818724	3.730791116
115	TCGA-BT-A20U-01	BLCA	2.200685052	5.259206857
116	TCGA-BT-A20V-01	BLCA	2.694707368	5.186984649
117	TCGA-BT-A20W-01	BLCA	2.160327959	4.149760513
118	TCGA-BT-A20X-01	BLCA	1.899084408	4.693253229
119	TCGA-BT-A2LA-01	BLCA	4.917942087	5.744567964
120	TCGA-BT-A2LB-01	BLCA	14.75966991	4.118714848
121	TCGA-BT-A2LD-01	BLCA	2.604146399	4.427692408
122	TCGA-BT-A3PH-01	BLCA	11.94487752	5.850801512
123	TCGA-BT-A3PJ-01	BLCA	12.27282363	4.505088198
124	TCGA-BT-A3PK-01	BLCA	9.059501127	4.135760797
125	TCGA-BT-A42C-01	BLCA	8.983038643	4.748318091
126	TCGA-BT-A42E-01	BLCA	4.782234268	3.764448804
127	TCGA-BT-A42F-01	BLCA	4.391845844	3.777455682
128	TCGA-C4-A0EZ-01	BLCA	4.841999433	6.857256514
129	TCGA-C4-A0F0-01	BLCA	2.309683571	5.286845046
130	TCGA-C4-A0F1-01	BLCA	4.141649402	4.633940445
131	TCGA-C4-A0F6-01	BLCA	5.190538834	5.293652484
132	TCGA-C4-A0F7-01	BLCA	1.751612	3.89529649
133	TCGA-CF-A1HR-01	BLCA	6.892234546	4.002091159
134	TCGA-CF-A1HS-01	BLCA	6.447101753	4.551488246
135	TCGA-CF-A27C-01	BLCA	3.815015102	3.114139049
136	TCGA-CF-A3MF-01	BLCA	0.603810752	1.112787122
137	TCGA-CF-A3MG-01	BLCA	3.653342277	5.608565855
138	TCGA-CF-A3MH-01	BLCA	1.206804507	3.381453215
139	TCGA-CF-A3MI-01	BLCA	1.840924239	1.72386649
140	TCGA-CF-A47S-01	BLCA	0.765501721	1.036491306
141	TCGA-CF-A47T-01	BLCA	0.733209502	3.836801144
142	TCGA-CF-A47V-01	BLCA	1.991781536	2.192601634
143	TCGA-CF-A47W-01	BLCA	0.776984501	3.325938184
144	TCGA-CF-A47X-01	BLCA	8.665977345	1.828233017
145	TCGA-CF-A47Y-01	BLCA	1.70891238	1.649207857
146	TCGA-CF-A5U8-01	BLCA	1.306417722	2.36886231
147	TCGA-CF-A5UA-01	BLCA	1.796141324	4.771464417
148	TCGA-CF-A7I0-01	BLCA	1.010531071	3.838515895
149	TCGA-CF-A8HX-01	BLCA	1.483568047	2.762600674
150	TCGA-CF-A8HY-01	BLCA	2.488335925	2.829790915
151	TCGA-CF-A9FF-01	BLCA	3.754150053	2.776248237
152	TCGA-CF-A9FH-01	BLCA	1.045434618	4.492689934
153	TCGA-CF-A9FL-01	BLCA	1.604785337	3.537999178
154	TCGA-CF-A9FM-01	BLCA	0.539068285	1.678046806
155	TCGA-CU-A0YN-01	BLCA	3.982703574	3.694603315
156	TCGA-CU-A0YO-01	BLCA	2.438881972	1.729994964
157	TCGA-CU-A0YR-01	BLCA	3.776660901	4.945423159
158	TCGA-CU-A3KJ-01	BLCA	6.007241496	4.850169833
159	TCGA-CU-A3QU-01	BLCA	2.518985579	4.057943283
160	TCGA-CU-A3YL-01	BLCA	6.136263446	2.519806594
161	TCGA-CU-A5W6-01	BLCA	5.59978846	4.522943713
162	TCGA-CU-A72E-01	BLCA	2.571171874	4.082489522
163	TCGA-DK-A1A3-01	BLCA	16.10329713	3.145046104
164	TCGA-DK-A1A5-01	BLCA	6.575670595	5.011797859
165	TCGA-DK-A1A7-01	BLCA	6.030766595	1.465398853
166	TCGA-DK-A1AA-01	BLCA	2.153573828	3.233110672
167	TCGA-DK-A1AB-01	BLCA	4.892025101	4.164503091
168	TCGA-DK-A1AC-01	BLCA	37.47765564	3.863938371
169	TCGA-DK-A1AD-01	BLCA	6.067332414	2.790020392
170	TCGA-DK-A1AE-01	BLCA	2.937038132	5.866279799
171	TCGA-DK-A1AF-01	BLCA	2.739330383	4.26969821
172	TCGA-DK-A1AG-01	BLCA	3.08204253	3.23122441
173	TCGA-DK-A2HX-01	BLCA	2.562739653	3.563679191
174	TCGA-DK-A2I1-01	BLCA	6.043957704	3.366355846
175	TCGA-DK-A2I2-01	BLCA	2.503304657	4.48595515
176	TCGA-DK-A2I4-01	BLCA	22.90598694	3.634982376
177	TCGA-DK-A2I6-01	BLCA	6.835335567	5.220679616
178	TCGA-DK-A3IK-01	BLCA	5.539315568	1.102374203
179	TCGA-DK-A3IL-01	BLCA	5.306700938	2.699974172
180	TCGA-DK-A3IM-01	BLCA	2.196613639	4.304055106
181	TCGA-DK-A3IN-01	BLCA	9.843640195	4.088547415
182	TCGA-DK-A3IQ-01	BLCA	4.790981382	3.425328894
183	TCGA-DK-A3IS-01	BLCA	9.335840001	5.424288891
184	TCGA-DK-A3IT-01	BLCA	11.55851879	4.517479369
185	TCGA-DK-A3IU-01	BLCA	9.721179998	3.720746873
186	TCGA-DK-A3IV-01	BLCA	2.149077714	3.798027326
187	TCGA-DK-A3WW-01	BLCA	29.43330641	5.649803346
188	TCGA-DK-A3WX-01	BLCA	0.952921574	5.580579614
189	TCGA-DK-A3WY-01	BLCA	0.326589624	5.155332591
190	TCGA-DK-A3X1-01	BLCA	21.4835234	3.765848802
191	TCGA-DK-A3X2-01	BLCA	3.282962881	7.30870591
192	TCGA-DK-A6AV-01	BLCA	2.876459633	4.308548694
193	TCGA-DK-A6AW-01	BLCA	101.6938089	3.631457102
194	TCGA-DK-A6B0-01	BLCA	0.649108211	2.987679198
195	TCGA-DK-A6B1-01	BLCA	3.488759893	4.626974711
196	TCGA-DK-A6B2-01	BLCA	4.670499953	3.947600538
197	TCGA-DK-A6B5-01	BLCA	3.305329324	3.893770154
198	TCGA-DK-A6B6-01	BLCA	22.1973577	3.779337706
199	TCGA-DK-AA6L-01	BLCA	11.05545413	2.231297195
200	TCGA-DK-AA6M-01	BLCA	1.72308864	3.852043062
201	TCGA-DK-AA6P-01	BLCA	4.903779824	3.58366268
202	TCGA-DK-AA6Q-01	BLCA	3.284523952	5.636297274
203	TCGA-DK-AA6R-01	BLCA	9.739153121	5.239008237
204	TCGA-DK-AA6S-01	BLCA	15.40200696	2.733485528
205	TCGA-DK-AA6T-01	BLCA	2.408750215	5.417617334
206	TCGA-DK-AA6U-01	BLCA	11.93245937	4.172000256
207	TCGA-DK-AA6W-01	BLCA	7.028647863	5.620235528
208	TCGA-DK-AA6X-01	BLCA	3.258233683	4.763173158
209	TCGA-DK-AA71-01	BLCA	17.5855036	5.292704529
210	TCGA-DK-AA74-01	BLCA	5.80382233	4.799733607
211	TCGA-DK-AA75-01	BLCA	12.04096528	4.172149759
212	TCGA-DK-AA76-01	BLCA	6.57414411	4.195484544
213	TCGA-DK-AA77-01	BLCA	9.531877135	4.179271572
214	TCGA-E5-A2PC-01	BLCA	6.014730628	5.503837036
215	TCGA-E5-A4TZ-01	BLCA	11.50224727	3.956341333
216	TCGA-E5-A4U1-01	BLCA	15.13810751	3.878715769
217	TCGA-E7-A3X6-01	BLCA	3.050783428	3.518898794
218	TCGA-E7-A3Y1-01	BLCA	4.098839759	2.436787785
219	TCGA-E7-A4IJ-01	BLCA	8.892663473	3.991443128
220	TCGA-E7-A4XJ-01	BLCA	1.10026356	3.121638858
221	TCGA-E7-A519-01	BLCA	2.109090602	1.378919206
222	TCGA-E7-A541-01	BLCA	11.88552207	4.544843772
223	TCGA-E7-A5KE-01	BLCA	4.600801328	4.981297189
224	TCGA-E7-A5KF-01	BLCA	4.947479722	4.169910081
225	TCGA-E7-A677-01	BLCA	5.687768566	4.503572445
226	TCGA-E7-A678-01	BLCA	1.303468231	1.866335286
227	TCGA-E7-A6MD-01	BLCA	10.95880108	2.247609316
228	TCGA-E7-A6ME-01	BLCA	3.664387504	5.41048725
229	TCGA-E7-A6MF-01	BLCA	1.195804199	0.704347964
230	TCGA-E7-A7DU-01	BLCA	7.562793377	2.498191106
231	TCGA-E7-A7DV-01	BLCA	8.505161566	4.312093672
232	TCGA-E7-A7PW-01	BLCA	1.974506393	3.672640126
233	TCGA-E7-A7XN-01	BLCA	23.68614465	4.85482662
234	TCGA-E7-A85H-01	BLCA	10.7672349	3.229651074
235	TCGA-E7-A8O7-01	BLCA	0.723903199	2.865880112
236	TCGA-E7-A8O8-01	BLCA	3.19699996	2.722966752
237	TCGA-E7-A97P-01	BLCA	5.446111449	5.235820785
238	TCGA-E7-A97Q-01	BLCA	1.880734097	3.348749195
239	TCGA-FD-A3B3-01	BLCA	4.462283527	4.24162941
240	TCGA-FD-A3B4-01	BLCA	2.097867846	4.411423989
241	TCGA-FD-A3B5-01	BLCA	4.189898046	4.297192811
242	TCGA-FD-A3B6-01	BLCA	7.451428602	4.575388801
243	TCGA-FD-A3B7-01	BLCA	1.778272561	4.416094702
244	TCGA-FD-A3B8-01	BLCA	0.626028905	4.227370582
245	TCGA-FD-A3N5-01	BLCA	8.367949915	4.686374035
246	TCGA-FD-A3N6-01	BLCA	3.22975022	5.380737308
247	TCGA-FD-A3NA-01	BLCA	4.541187306	4.357023458
248	TCGA-FD-A3SJ-01	BLCA	6.450389872	3.42162877
249	TCGA-FD-A3SL-01	BLCA	5.68869422	2.317948434
250	TCGA-FD-A3SM-01	BLCA	5.172958748	3.547062226
251	TCGA-FD-A3SN-01	BLCA	9.501660108	4.129183913
252	TCGA-FD-A3SO-01	BLCA	9.112809168	4.934139309
253	TCGA-FD-A3SP-01	BLCA	2.917890673	4.186591607
254	TCGA-FD-A3SQ-01	BLCA	1.81077802	2.447912936
255	TCGA-FD-A3SR-01	BLCA	3.754928195	3.139945033
256	TCGA-FD-A3SS-01	BLCA	12.09286473	4.184245857
257	TCGA-FD-A43N-01	BLCA	4.54179569	2.945109012
258	TCGA-FD-A43P-01	BLCA	10.7923564	4.885482646
259	TCGA-FD-A43S-01	BLCA	0	1.686074262
260	TCGA-FD-A43U-01	BLCA	1.66491573	3.630069971
261	TCGA-FD-A43X-01	BLCA	7.963043995	2.848449173
262	TCGA-FD-A43Y-01	BLCA	1.678698713	3.60170012
263	TCGA-FD-A5BR-01	BLCA	2.492750656	3.216741593
264	TCGA-FD-A5BS-01	BLCA	0.545613007	3.843816454
265	TCGA-FD-A5BT-01	BLCA	3.000240809	3.438051639
266	TCGA-FD-A5BU-01	BLCA	1.983127988	3.400336039
267	TCGA-FD-A5BV-01	BLCA	3.149733746	4.855984056
268	TCGA-FD-A5BX-01	BLCA	9.479875081	4.041463977
269	TCGA-FD-A5BY-01	BLCA	1.230839268	4.83725293
270	TCGA-FD-A5BZ-01	BLCA	3.021577702	3.739352399
271	TCGA-FD-A5C0-01	BLCA	3.034830289	3.598265672
272	TCGA-FD-A5C1-01	BLCA	3.409641785	5.551073583
273	TCGA-FD-A62N-01	BLCA	2.338653722	4.041310096
274	TCGA-FD-A62O-01	BLCA	4.601275336	4.507991004
275	TCGA-FD-A62P-01	BLCA	9.76285336	3.902430072
276	TCGA-FD-A62S-01	BLCA	1.919140922	3.715055481
277	TCGA-FD-A6TA-01	BLCA	7.337379043	3.023414739
278	TCGA-FD-A6TB-01	BLCA	5.051093227	4.01244677
279	TCGA-FD-A6TC-01	BLCA	24.74911906	4.081868632
280	TCGA-FD-A6TD-01	BLCA	3.491502931	4.485940179
281	TCGA-FD-A6TE-01	BLCA	6.413624047	5.027890666
282	TCGA-FD-A6TF-01	BLCA	3.686822862	4.013520472
283	TCGA-FD-A6TG-01	BLCA	10.56683201	3.354235926
284	TCGA-FD-A6TH-01	BLCA	4.515656345	5.088652355
285	TCGA-FD-A6TI-01	BLCA	3.464420932	3.175684714
286	TCGA-FD-A6TK-01	BLCA	3.183424322	5.539432961
287	TCGA-FJ-A3Z7-01	BLCA	8.114747632	1.717446481
288	TCGA-FJ-A3Z9-01	BLCA	1.798445514	4.023813322
289	TCGA-FJ-A3ZE-01	BLCA	10.64899299	4.673530048
290	TCGA-FJ-A3ZF-01	BLCA	6.011851799	3.402365867
291	TCGA-FJ-A871-01	BLCA	1.235997194	5.700770243
292	TCGA-FT-A3EE-01	BLCA	3.277963123	3.721718695
293	TCGA-FT-A61P-01	BLCA	4.073329287	4.303726856
294	TCGA-G2-A2EC-01	BLCA	4.891237874	2.286484347
295	TCGA-G2-A2EF-01	BLCA	6.758388975	4.22537051
296	TCGA-G2-A2EJ-01	BLCA	8.230773782	5.447782395
297	TCGA-G2-A2EK-01	BLCA	1.797079498	1.616682299
298	TCGA-G2-A2EL-01	BLCA	5.959807945	7.659974974
299	TCGA-G2-A2EO-01	BLCA	21.3722944	5.211565799
300	TCGA-G2-A2ES-01	BLCA	11.06339922	6.148401439
301	TCGA-G2-A3IB-01	BLCA	2.593874425	5.395542231
302	TCGA-G2-A3IE-01	BLCA	9.81488933	2.263678746
303	TCGA-G2-A3VY-01	BLCA	19.28876731	3.532415734
304	TCGA-G2-AA3B-01	BLCA	19.38703924	4.901271921
305	TCGA-G2-AA3C-01	BLCA	6.475714498	4.121048444
306	TCGA-G2-AA3D-01	BLCA	6.217367014	4.31260555
307	TCGA-G2-AA3F-01	BLCA	4.06962979	3.613809487
308	TCGA-GC-A3BM-01	BLCA	3.142094601	4.359167023
309	TCGA-GC-A3I6-01	BLCA	4.897180898	5.738588873
310	TCGA-GC-A3OO-01	BLCA	3.206505821	4.166920608
311	TCGA-GC-A3RB-01	BLCA	4.030386588	5.726535448
312	TCGA-GC-A3RC-01	BLCA	8.638513048	4.066998811
313	TCGA-GC-A3RD-01	BLCA	2.131284796	3.524712334
314	TCGA-GC-A3WC-01	BLCA	3.800127259	4.159638198
315	TCGA-GC-A3YS-01	BLCA	5.805736565	4.597700738
316	TCGA-GC-A4ZW-01	BLCA	18.14803709	3.079725571
317	TCGA-GC-A6I1-01	BLCA	5.685640969	4.270827718
318	TCGA-GC-A6I3-01	BLCA	5.585058521	3.449066272
319	TCGA-GD-A2C5-01	BLCA	6.747629608	2.677542418
320	TCGA-GD-A3OP-01	BLCA	8.847626269	2.640774819
321	TCGA-GD-A3OQ-01	BLCA	2.930613684	5.235744424
322	TCGA-GD-A3OS-01	BLCA	2.522126494	5.695517007
323	TCGA-GD-A6C6-01	BLCA	6.554642461	4.342280923
324	TCGA-GD-A76B-01	BLCA	5.17028344	2.818726351
325	TCGA-GU-A42P-01	BLCA	6.620123004	4.053399261
326	TCGA-GU-A42Q-01	BLCA	4.864623151	6.129306307
327	TCGA-GU-A42R-01	BLCA	3.644499568	4.538331741
328	TCGA-GU-A762-01	BLCA	2.67696715	4.835732606
329	TCGA-GU-A763-01	BLCA	1.757246605	3.332601641
330	TCGA-GU-A764-01	BLCA	2.941256646	2.357342036
331	TCGA-GU-A766-01	BLCA	4.971960816	4.170986194
332	TCGA-GU-A767-01	BLCA	10.75306615	4.65454711
333	TCGA-GU-AATO-01	BLCA	8.471530436	3.511577547
334	TCGA-GU-AATP-01	BLCA	8.585801474	3.361278796
335	TCGA-GU-AATQ-01	BLCA	4.463438436	6.225880836
336	TCGA-GV-A3JV-01	BLCA	2.957836761	5.319935301
337	TCGA-GV-A3JW-01	BLCA	2.200285412	4.07637832
338	TCGA-GV-A3JX-01	BLCA	7.720526588	5.026299545
339	TCGA-GV-A3JZ-01	BLCA	12.63743168	4.582176749
340	TCGA-GV-A3QF-01	BLCA	3.589547485	4.155879903
341	TCGA-GV-A3QG-01	BLCA	2.371850637	3.732708681
342	TCGA-GV-A3QH-01	BLCA	4.429215922	4.245314607
343	TCGA-GV-A3QI-01	BLCA	12.79863866	6.312869482
344	TCGA-GV-A3QK-01	BLCA	3.398694028	4.121850617
345	TCGA-GV-A40E-01	BLCA	3.906458548	5.496816944
346	TCGA-GV-A40G-01	BLCA	3.987705409	3.22191147
347	TCGA-GV-A6ZA-01	BLCA	8.746089559	3.99878981
348	TCGA-H4-A2HO-01	BLCA	2.290981252	2.097035116
349	TCGA-H4-A2HQ-01	BLCA	11.04360002	4.068294828
350	TCGA-HQ-A2OE-01	BLCA	4.112058068	5.337775915
351	TCGA-HQ-A2OF-01	BLCA	2.915155186	5.672756302
352	TCGA-HQ-A5ND-01	BLCA	2.240533941	5.104464478
353	TCGA-HQ-A5NE-01	BLCA	9.253553328	4.864847243
354	TCGA-K4-A3WS-01	BLCA	7.266840889	3.118629798
355	TCGA-K4-A3WU-01	BLCA	4.772363576	2.29992248
356	TCGA-K4-A3WV-01	BLCA	1.59108557	4.03279279
357	TCGA-K4-A4AB-01	BLCA	2.322810426	1.745198261
358	TCGA-K4-A4AC-01	BLCA	3.859292883	5.387097206
359	TCGA-K4-A54R-01	BLCA	24.00594129	3.940761636
360	TCGA-K4-A5RH-01	BLCA	4.652760247	4.517049556
361	TCGA-K4-A5RI-01	BLCA	3.377475423	6.217041679
362	TCGA-K4-A5RJ-01	BLCA	8.591145676	5.384922148
363	TCGA-K4-A6FZ-01	BLCA	9.909154085	4.361855043
364	TCGA-K4-A6MB-01	BLCA	8.444782833	3.675122691
365	TCGA-K4-A83P-01	BLCA	6.17696518	2.674248214
366	TCGA-K4-AAQO-01	BLCA	6.651920879	3.779774843
367	TCGA-KQ-A41N-01	BLCA	7.170376905	2.756760428
368	TCGA-KQ-A41O-01	BLCA	6.058705875	4.07803664
369	TCGA-KQ-A41P-01	BLCA	8.083349955	4.174060946
370	TCGA-KQ-A41Q-01	BLCA	3.988338223	4.196960154
371	TCGA-KQ-A41R-01	BLCA	19.0408984	3.099944205
372	TCGA-KQ-A41S-01	BLCA	5.878347832	5.010926927
373	TCGA-LC-A66R-01	BLCA	3.376631382	4.701378447
374	TCGA-LT-A5Z6-01	BLCA	12.70269766	5.439075822
375	TCGA-LT-A8JT-01	BLCA	1.986074699	2.301902575
376	TCGA-MV-A51V-01	BLCA	40.58643674	3.258492868
377	TCGA-PQ-A6FI-01	BLCA	3.978827104	5.837242388
378	TCGA-PQ-A6FN-01	BLCA	2.058304937	4.31309504
379	TCGA-R3-A69X-01	BLCA	5.48415728	4.377001042
380	TCGA-S5-A6DX-01	BLCA	16.4031046	3.280010579
381	TCGA-S5-AA26-01	BLCA	6.216809333	4.671375146
382	TCGA-SY-A9G0-01	BLCA	1.150499992	3.408926914
383	TCGA-SY-A9G5-01	BLCA	26.44043871	4.494277781
384	TCGA-UY-A78K-01	BLCA	21.40901564	4.99666514
385	TCGA-UY-A78L-01	BLCA	5.182939691	5.177688364
386	TCGA-UY-A78M-01	BLCA	4.106366869	4.481864948
387	TCGA-UY-A78N-01	BLCA	6.681824625	6.285190029
388	TCGA-UY-A78O-01	BLCA	4.94909897	3.495447089
389	TCGA-UY-A78P-01	BLCA	7.190900445	4.227146933
390	TCGA-UY-A8OB-01	BLCA	9.247480674	5.299599328
391	TCGA-UY-A8OC-01	BLCA	2.59324027	3.952128217
392	TCGA-UY-A8OD-01	BLCA	2.56718491	3.143697891
393	TCGA-UY-A9PA-01	BLCA	4.078199086	3.100198411
394	TCGA-UY-A9PB-01	BLCA	13.64965123	3.363915704
395	TCGA-UY-A9PD-01	BLCA	7.593737914	3.916847716
396	TCGA-UY-A9PE-01	BLCA	5.644348463	4.375234484
397	TCGA-UY-A9PF-01	BLCA	11.59672786	1.317420157
398	TCGA-UY-A9PH-01	BLCA	9.096089755	3.806590601
399	TCGA-XF-A8HB-01	BLCA	2.056238807	5.308045722
400	TCGA-XF-A8HC-01	BLCA	3.44647682	4.305440118
401	TCGA-XF-A8HD-01	BLCA	12.20564412	4.962650746
402	TCGA-XF-A8HE-01	BLCA	10.59017897	5.751727561
403	TCGA-XF-A8HF-01	BLCA	4.228061007	5.192661134
404	TCGA-XF-A8HG-01	BLCA	7.91620976	2.86934449
405	TCGA-XF-A8HH-01	BLCA	2.294131029	2.109518358
406	TCGA-XF-A8HI-01	BLCA	1.851415977	3.788443975
407	TCGA-XF-A9SH-01	BLCA	1.089137469	2.990590567
408	TCGA-XF-A9SI-01	BLCA	9.11703387	3.606466029
409	TCGA-XF-A9SJ-01	BLCA	7.219284227	3.354719382
410	TCGA-XF-A9SK-01	BLCA	3.964546179	2.301425026
411	TCGA-XF-A9SL-01	BLCA	2.175170203	3.190399899
412	TCGA-XF-A9SM-01	BLCA	6.100331012	4.133207098
413	TCGA-XF-A9SP-01	BLCA	8.072605707	3.184952167
414	TCGA-XF-A9ST-01	BLCA	15.86521281	5.743446456
415	TCGA-XF-A9SU-01	BLCA	1.510269865	3.816188497
416	TCGA-XF-A9SV-01	BLCA	1.765652744	4.135786429
417	TCGA-XF-A9SW-01	BLCA	1.159603864	3.78989665
418	TCGA-XF-A9SX-01	BLCA	2.863459174	4.050269365
419	TCGA-XF-A9SY-01	BLCA	11.32945739	5.368888729
420	TCGA-XF-A9SZ-01	BLCA	5.816589445	4.453482234
421	TCGA-XF-A9T0-01	BLCA	19.93832185	4.072816549
422	TCGA-XF-A9T2-01	BLCA	2.367866199	5.373849776
423	TCGA-XF-A9T3-01	BLCA	10.69339088	4.604088393
424	TCGA-XF-A9T4-01	BLCA	0.978825466	4.841991337
425	TCGA-XF-A9T5-01	BLCA	19.13115456	5.05696839
426	TCGA-XF-A9T6-01	BLCA	8.965454657	5.274179048
427	TCGA-XF-A9T8-01	BLCA	18.95237373	5.110523596
428	TCGA-XF-AAME-01	BLCA	0.410711041	3.855293617
429	TCGA-XF-AAMG-01	BLCA	27.39696162	4.967174148
430	TCGA-XF-AAMH-01	BLCA	1.677505887	4.359024518
431	TCGA-XF-AAMJ-01	BLCA	1.044267818	2.775095262
432	TCGA-XF-AAML-01	BLCA	13.48566839	4.443690087
433	TCGA-XF-AAMQ-01	BLCA	5.144158043	4.634581807
434	TCGA-XF-AAMR-01	BLCA	2.591366333	3.929703677
435	TCGA-XF-AAMT-01	BLCA	2.942134106	3.729880938
436	TCGA-XF-AAMW-01	BLCA	0.71690652	4.555516662
437	TCGA-XF-AAMX-01	BLCA	9.160613611	4.694365642
438	TCGA-XF-AAMY-01	BLCA	3.135568184	3.528696631
439	TCGA-XF-AAMZ-01	BLCA	7.227945505	5.685213413
440	TCGA-XF-AAN0-01	BLCA	11.45154441	3.638931579
441	TCGA-XF-AAN1-01	BLCA	2.120249608	4.185581556
442	TCGA-XF-AAN2-01	BLCA	11.41222544	5.142232956
443	TCGA-XF-AAN3-01	BLCA	3.796703549	3.180849681
444	TCGA-XF-AAN4-01	BLCA	0.99813293	3.349425479
445	TCGA-XF-AAN5-01	BLCA	8.716145643	5.440169483
446	TCGA-XF-AAN7-01	BLCA	4.396126587	6.464133713
447	TCGA-XF-AAN8-01	BLCA	0	1.093015277
448	TCGA-YC-A89H-01	BLCA	40.10518665	3.965839198
449	TCGA-YC-A8S6-01	BLCA	2.657636608	3.892094039
450	TCGA-YC-A9TC-01	BLCA	3.343132699	5.428826387
451	TCGA-YF-AA3L-01	BLCA	8.161784989	3.767175035
452	TCGA-YF-AA3M-01	BLCA	4.143015614	6.477272666
453	TCGA-ZF-A9R0-01	BLCA	5.110799564	1.293490563
454	TCGA-ZF-A9R1-01	BLCA	2.460257761	4.775910581
455	TCGA-ZF-A9R2-01	BLCA	3.836968478	5.095679199
456	TCGA-ZF-A9R3-01	BLCA	2.324277385	4.025698026
457	TCGA-ZF-A9R4-01	BLCA	6.985232164	3.103272944
458	TCGA-ZF-A9R5-01	BLCA	3.096393672	2.252749784
459	TCGA-ZF-A9R7-01	BLCA	18.22454118	3.168803465
460	TCGA-ZF-A9R9-01	BLCA	5.046355154	2.255157922
461	TCGA-ZF-A9RC-01	BLCA	24.08374941	4.736724095
462	TCGA-ZF-A9RD-01	BLCA	4.623431805	4.810171065
463	TCGA-ZF-A9RE-01	BLCA	1.728779993	4.567777137
464	TCGA-ZF-A9RF-01	BLCA	6.652816398	4.414314405
465	TCGA-ZF-A9RL-01	BLCA	8.511821674	3.964109817
466	TCGA-ZF-A9RM-01	BLCA	2.319879376	5.344502349
467	TCGA-ZF-A9RN-01	BLCA	4.931569138	6.070638907
468	TCGA-ZF-AA4N-01	BLCA	4.229709695	5.944952069
469	TCGA-ZF-AA4R-01	BLCA	1.743138137	4.462765698
470	TCGA-ZF-AA4T-01	BLCA	2.58651985	4.44678269
471	TCGA-ZF-AA4U-01	BLCA	1.575638771	3.485954163
472	TCGA-ZF-AA4V-01	BLCA	16.67806636	4.482370679
473	TCGA-ZF-AA4W-01	BLCA	14.31063267	4.51630483
474	TCGA-ZF-AA4X-01	BLCA	16.52827773	4.579686677
475	TCGA-ZF-AA51-01	BLCA	18.09658456	3.352496955
476	TCGA-ZF-AA52-01	BLCA	2.988739457	2.872614456
477	TCGA-ZF-AA53-01	BLCA	4.326729117	3.41806218
478	TCGA-ZF-AA54-01	BLCA	4.996477635	5.38022043
479	TCGA-ZF-AA56-01	BLCA	2.880373219	4.553412403
480	TCGA-ZF-AA58-01	BLCA	5.906607323	4.420510228
481	TCGA-ZF-AA5H-01	BLCA	1.596450046	3.776776002
482	TCGA-ZF-AA5N-01	BLCA	1.433638718	4.546050407
483	TCGA-ZF-AA5P-01	BLCA	1.167489306	2.532887922
484	TCGA-AC-A6IX-06	BRCA	0	3.874335278
485	TCGA-E2-A15A-06	BRCA	0	5.559734402
486	TCGA-E2-A15E-06	BRCA	0	1.873576001
487	TCGA-E2-A15K-06	BRCA	0	3.862577581
488	TCGA-3C-AAAU-01	BRCA	0.459910922	5.827617362
489	TCGA-3C-AALI-01	BRCA	9.458112063	5.914711627
490	TCGA-3C-AALJ-01	BRCA	0.531066261	4.667947533
491	TCGA-3C-AALK-01	BRCA	1.024084059	3.794196867
492	TCGA-4H-AAAK-01	BRCA	0.356355448	3.541565761
493	TCGA-5L-AAT0-01	BRCA	2.815674075	3.105357734
494	TCGA-5T-A9QA-01	BRCA	0.586671086	5.36686455
495	TCGA-A1-A0SB-01	BRCA	0.419783383	3.237152883
496	TCGA-A1-A0SD-01	BRCA	0.806966424	4.370782861
497	TCGA-A1-A0SE-01	BRCA	0.666147311	5.241332663
498	TCGA-A1-A0SF-01	BRCA	1.242606016	2.249905025
499	TCGA-A1-A0SG-01	BRCA	0.785049873	2.433483641
500	TCGA-A1-A0SH-01	BRCA	2.295380912	3.113315883
501	TCGA-A1-A0SI-01	BRCA	4.951466421	3.7320763
502	TCGA-A1-A0SJ-01	BRCA	0.799851356	5.782423637
503	TCGA-A1-A0SK-01	BRCA	1.564464458	4.858770847
504	TCGA-A1-A0SM-01	BRCA	0.489372017	4.6766995
505	TCGA-A1-A0SN-01	BRCA	1.442531094	5.072572296
506	TCGA-A1-A0SO-01	BRCA	6.812409911	5.503406259
507	TCGA-A1-A0SP-01	BRCA	1.378538984	5.06294073
508	TCGA-A1-A0SQ-01	BRCA	0.740357186	4.301039374
509	TCGA-A2-A04N-01	BRCA	1.06430765	2.730056568
510	TCGA-A2-A04P-01	BRCA	3.196066816	2.879448764
511	TCGA-A2-A04Q-01	BRCA	0.882199951	3.792651129
512	TCGA-A2-A04R-01	BRCA	2.030154073	5.964851417
513	TCGA-A2-A04T-01	BRCA	2.235007028	5.380095639
514	TCGA-A2-A04U-01	BRCA	1.284262659	4.425426491
515	TCGA-A2-A04V-01	BRCA	0.684569841	3.703429028
516	TCGA-A2-A04W-01	BRCA	3.294510669	3.539282911
517	TCGA-A2-A04X-01	BRCA	0.695783195	4.180022802
518	TCGA-A2-A04Y-01	BRCA	1.153112249	3.614640134
519	TCGA-A2-A0CK-01	BRCA	0.259725369	4.541854417
520	TCGA-A2-A0CL-01	BRCA	2.76114967	3.98746445
521	TCGA-A2-A0CM-01	BRCA	1.485757882	6.658578071
522	TCGA-A2-A0CO-01	BRCA	0	1.381676224
523	TCGA-A2-A0CP-01	BRCA	0.979411018	1.140610426
524	TCGA-A2-A0CQ-01	BRCA	0.818031799	4.120001691
525	TCGA-A2-A0CR-01	BRCA	2.41408312	3.192142429
526	TCGA-A2-A0CS-01	BRCA	0.81876919	3.389118807
527	TCGA-A2-A0CT-01	BRCA	2.12939027	6.692998712
528	TCGA-A2-A0CU-01	BRCA	1.142558438	4.167216391
529	TCGA-A2-A0CV-01	BRCA	0.547254915	0.873106763
530	TCGA-A2-A0CW-01	BRCA	1.511658382	5.019469968
531	TCGA-A2-A0CX-01	BRCA	6.550657232	4.372236589
532	TCGA-A2-A0CZ-01	BRCA	0.631909727	1.252079809
533	TCGA-A2-A0D0-01	BRCA	1.978289099	6.083811947
534	TCGA-A2-A0D1-01	BRCA	1.220139873	3.775069405
535	TCGA-A2-A0D2-01	BRCA	2.148312085	6.226998677
536	TCGA-A2-A0D3-01	BRCA	0.6809125	1.942778164
537	TCGA-A2-A0D4-01	BRCA	0.840892153	5.907024257
538	TCGA-A2-A0EM-01	BRCA	0.704183478	4.166503499
539	TCGA-A2-A0EN-01	BRCA	0.817828152	2.751120004
540	TCGA-A2-A0EO-01	BRCA	0.614151725	3.928663932
541	TCGA-A2-A0EP-01	BRCA	0.107011574	2.622534648
542	TCGA-A2-A0EQ-01	BRCA	5.009360289	5.272086818
543	TCGA-A2-A0ER-01	BRCA	0.686302966	5.068880696
544	TCGA-A2-A0ES-01	BRCA	0.217276667	2.38808577
545	TCGA-A2-A0ET-01	BRCA	1.061675969	4.837877148
546	TCGA-A2-A0EU-01	BRCA	1.209096639	3.050984858
547	TCGA-A2-A0EV-01	BRCA	1.718157902	3.997673712
548	TCGA-A2-A0EW-01	BRCA	0.378718816	2.383259997
549	TCGA-A2-A0EX-01	BRCA	0.678097444	4.278835204
550	TCGA-A2-A0EY-01	BRCA	4.99579973	4.10824158
551	TCGA-A2-A0ST-01	BRCA	0.328164335	4.156630573
552	TCGA-A2-A0SU-01	BRCA	0.7871137	4.754720098
553	TCGA-A2-A0SV-01	BRCA	0.853417484	5.129888806
554	TCGA-A2-A0SW-01	BRCA	1.632261754	5.687084585
555	TCGA-A2-A0SX-01	BRCA	0.584669079	3.421883707
556	TCGA-A2-A0SY-01	BRCA	2.98414997	3.952562149
557	TCGA-A2-A0T0-01	BRCA	4.553472538	5.180778944
558	TCGA-A2-A0T1-01	BRCA	0.583968922	2.393539201
559	TCGA-A2-A0T2-01	BRCA	0.740555635	4.563646479
560	TCGA-A2-A0T3-01	BRCA	0.783959648	5.343862774
561	TCGA-A2-A0T4-01	BRCA	0.746464146	5.514114377
562	TCGA-A2-A0T5-01	BRCA	0.412103185	4.792242959
563	TCGA-A2-A0T6-01	BRCA	0.485905052	2.01588116
564	TCGA-A2-A0T7-01	BRCA	0.534446221	4.180934829
565	TCGA-A2-A0YC-01	BRCA	0.566253889	4.324410117
566	TCGA-A2-A0YD-01	BRCA	1.64813956	3.725471035
567	TCGA-A2-A0YE-01	BRCA	0.695449298	5.276762867
568	TCGA-A2-A0YF-01	BRCA	0.615067016	5.371204166
569	TCGA-A2-A0YG-01	BRCA	1.328705395	5.768720816
570	TCGA-A2-A0YH-01	BRCA	1.894192372	4.097909234
571	TCGA-A2-A0YI-01	BRCA	0.30215145	2.093690757
572	TCGA-A2-A0YJ-01	BRCA	2.036647133	5.234556573
573	TCGA-A2-A0YK-01	BRCA	7.954597121	2.42635445
574	TCGA-A2-A0YL-01	BRCA	0.571395501	4.612751507
575	TCGA-A2-A0YM-01	BRCA	1.950200678	5.377934572
576	TCGA-A2-A0YT-01	BRCA	1.550176812	5.012602817
577	TCGA-A2-A1FV-01	BRCA	1.063660207	4.08020152
578	TCGA-A2-A1FW-01	BRCA	1.701164754	3.934235195
579	TCGA-A2-A1FX-01	BRCA	0.562287292	5.484346665
580	TCGA-A2-A1FZ-01	BRCA	0.620270478	3.837717866
581	TCGA-A2-A1G0-01	BRCA	0.550428058	3.432920486
582	TCGA-A2-A1G1-01	BRCA	0.720637361	5.79568066
583	TCGA-A2-A1G4-01	BRCA	0.784997888	4.820198925
584	TCGA-A2-A1G6-01	BRCA	0.224725167	1.181961876
585	TCGA-A2-A259-01	BRCA	0.565517796	2.913429496
586	TCGA-A2-A25A-01	BRCA	2.422867178	4.182592935
587	TCGA-A2-A25B-01	BRCA	2.40885642	5.892820976
588	TCGA-A2-A25C-01	BRCA	0.942825256	5.835862621
589	TCGA-A2-A25D-01	BRCA	1.347284454	3.664845241
590	TCGA-A2-A25E-01	BRCA	1.39048722	5.553224068
591	TCGA-A2-A25F-01	BRCA	0.059275609	5.013237371
592	TCGA-A2-A3KC-01	BRCA	0	4.496624052
593	TCGA-A2-A3KD-01	BRCA	0.177217267	4.467340711
594	TCGA-A2-A3XS-01	BRCA	0	4.717240975
595	TCGA-A2-A3XT-01	BRCA	1.398379296	5.662768161
596	TCGA-A2-A3XU-01	BRCA	0.367994362	4.684156489
597	TCGA-A2-A3XV-01	BRCA	0.783143352	3.283858719
598	TCGA-A2-A3XW-01	BRCA	0.108372779	2.808425852
599	TCGA-A2-A3XX-01	BRCA	0.623311672	5.232240661
600	TCGA-A2-A3XY-01	BRCA	0	3.648999649
601	TCGA-A2-A3XZ-01	BRCA	0.661372497	3.447471477
602	TCGA-A2-A3Y0-01	BRCA	3.013676343	4.983186276
603	TCGA-A2-A4RW-01	BRCA	0	3.225380152
604	TCGA-A2-A4RX-01	BRCA	0	5.208406299
605	TCGA-A2-A4RY-01	BRCA	0	1.792556111
606	TCGA-A2-A4S0-01	BRCA	0	2.956333792
607	TCGA-A2-A4S1-01	BRCA	1.486216276	2.879012738
608	TCGA-A2-A4S2-01	BRCA	0.56050265	3.593633652
609	TCGA-A2-A4S3-01	BRCA	1.178535746	5.286863738
610	TCGA-A7-A0CD-01	BRCA	0.550623381	5.014082899
611	TCGA-A7-A0CE-01	BRCA	2.532880177	5.662964606
612	TCGA-A7-A0CG-01	BRCA	1.005528964	4.168293297
613	TCGA-A7-A0CH-01	BRCA	0.810116334	3.812894945
614	TCGA-A7-A0CJ-01	BRCA	1.515103622	4.548610179
615	TCGA-A7-A0D9-01	BRCA	0.565405952	2.508545682
616	TCGA-A7-A0DA-01	BRCA	3.521748092	5.140022729
617	TCGA-A7-A0DB-01	BRCA	0.555954978	3.228701136
618	TCGA-A7-A13D-01	BRCA	1.788198924	3.402811015
619	TCGA-A7-A13E-01	BRCA	1.017541419	5.362019292
620	TCGA-A7-A13F-01	BRCA	0.923851488	6.023736252
621	TCGA-A7-A13G-01	BRCA	0.546292056	1.196374816
622	TCGA-A7-A13H-01	BRCA	0	2.885943609
623	TCGA-A7-A26E-01	BRCA	0.826114308	4.681820123
624	TCGA-A7-A26F-01	BRCA	0.908685924	2.157656547
625	TCGA-A7-A26G-01	BRCA	1.242457286	4.159016807
626	TCGA-A7-A26H-01	BRCA	3.042442132	4.979558212
627	TCGA-A7-A26I-01	BRCA	1.039252633	3.434897645
628	TCGA-A7-A26J-01	BRCA	0.371205468	4.575825756
629	TCGA-A7-A2KD-01	BRCA	0.573835705	5.049056895
630	TCGA-A7-A3IY-01	BRCA	0	4.071430731
631	TCGA-A7-A3IZ-01	BRCA	0	4.537253256
632	TCGA-A7-A3J0-01	BRCA	0	4.895062287
633	TCGA-A7-A3J1-01	BRCA	0	2.435527206
634	TCGA-A7-A3RF-01	BRCA	0.402228549	3.948167927
635	TCGA-A7-A425-01	BRCA	0.540239546	3.816203227
636	TCGA-A7-A426-01	BRCA	0	2.942106601
637	TCGA-A7-A4SA-01	BRCA	0	3.586165637
638	TCGA-A7-A4SB-01	BRCA	0	4.821343332
639	TCGA-A7-A4SC-01	BRCA	0.553679407	3.705249424
640	TCGA-A7-A4SD-01	BRCA	0.81590072	5.107349654
641	TCGA-A7-A4SE-01	BRCA	1.777066489	4.10479029
642	TCGA-A7-A4SF-01	BRCA	0	4.368299485
643	TCGA-A7-A56D-01	BRCA	2.455005011	2.089734811
644	TCGA-A7-A5ZV-01	BRCA	3.639939262	4.09678623
645	TCGA-A7-A5ZW-01	BRCA	0.560126537	3.601875602
646	TCGA-A7-A5ZX-01	BRCA	0.582023289	2.145672061
647	TCGA-A7-A6VV-01	BRCA	0.933106461	4.529443031
648	TCGA-A7-A6VW-01	BRCA	1.233883992	5.961879232
649	TCGA-A7-A6VX-01	BRCA	2.366355127	4.846632082
650	TCGA-A7-A6VY-01	BRCA	1.885564628	4.740060786
651	TCGA-A8-A06N-01	BRCA	0.92071659	3.201377719
652	TCGA-A8-A06O-01	BRCA	1.943532969	4.728264608
653	TCGA-A8-A06P-01	BRCA	0.922554826	2.206378564
654	TCGA-A8-A06Q-01	BRCA	5.794626168	5.257454304
655	TCGA-A8-A06R-01	BRCA	1.599425317	2.590297025
656	TCGA-A8-A06T-01	BRCA	0.729829967	3.218902404
657	TCGA-A8-A06U-01	BRCA	1.755015828	4.602901879
658	TCGA-A8-A06X-01	BRCA	5.25241816	4.291876172
659	TCGA-A8-A06Y-01	BRCA	0.767482703	3.599395799
660	TCGA-A8-A06Z-01	BRCA	1.910106789	3.476187433
661	TCGA-A8-A075-01	BRCA	1.879057209	4.761466068
662	TCGA-A8-A076-01	BRCA	1.978684987	4.485716747
663	TCGA-A8-A079-01	BRCA	1.702583347	5.274685374
664	TCGA-A8-A07B-01	BRCA	1.849553835	5.217739919
665	TCGA-A8-A07C-01	BRCA	3.436739415	5.578729087
666	TCGA-A8-A07E-01	BRCA	1.401638445	4.457268491
667	TCGA-A8-A07F-01	BRCA	0.749671202	5.263647628
668	TCGA-A8-A07G-01	BRCA	1.387742652	2.504968359
669	TCGA-A8-A07I-01	BRCA	1.116036587	3.820612075
670	TCGA-A8-A07J-01	BRCA	0.879075869	2.10990233
671	TCGA-A8-A07L-01	BRCA	2.266875416	5.794726422
672	TCGA-A8-A07O-01	BRCA	1.040256067	5.888271822
673	TCGA-A8-A07P-01	BRCA	1.252440732	4.276649824
674	TCGA-A8-A07U-01	BRCA	1.48380236	4.740778004
675	TCGA-A8-A07W-01	BRCA	3.298774559	5.007149159
676	TCGA-A8-A07Z-01	BRCA	0.449862495	4.852086681
677	TCGA-A8-A081-01	BRCA	2.692495557	4.399278348
678	TCGA-A8-A082-01	BRCA	0.476117769	5.110151025
679	TCGA-A8-A083-01	BRCA	0.931396185	2.116514315
680	TCGA-A8-A085-01	BRCA	1.825423883	3.801690194
681	TCGA-A8-A086-01	BRCA	0.482324699	4.259549179
682	TCGA-A8-A08A-01	BRCA	0.615202209	3.617905653
683	TCGA-A8-A08B-01	BRCA	1.192155249	5.770720628
684	TCGA-A8-A08C-01	BRCA	0	4.115790778
685	TCGA-A8-A08G-01	BRCA	1.316390077	4.329898501
686	TCGA-A8-A08H-01	BRCA	3.080128851	4.729464753
687	TCGA-A8-A08I-01	BRCA	0.982203516	5.366079065
688	TCGA-A8-A08J-01	BRCA	0.911077168	3.955159543
689	TCGA-A8-A08L-01	BRCA	5.819963233	5.726774219
690	TCGA-A8-A08O-01	BRCA	0.635603596	5.417701729
691	TCGA-A8-A08P-01	BRCA	1.73640708	5.071255522
692	TCGA-A8-A08R-01	BRCA	5.561288489	5.649887645
693	TCGA-A8-A08T-01	BRCA	1.110734062	3.438505996
694	TCGA-A8-A08X-01	BRCA	0.823187498	3.436187935
695	TCGA-A8-A08Z-01	BRCA	0.810204447	3.419498972
696	TCGA-A8-A090-01	BRCA	0.948637521	5.889091059
697	TCGA-A8-A091-01	BRCA	0.492997115	3.735424273
698	TCGA-A8-A092-01	BRCA	2.078289788	4.744066098
699	TCGA-A8-A093-01	BRCA	2.560909915	4.556234338
700	TCGA-A8-A094-01	BRCA	5.064678847	5.512606382
701	TCGA-A8-A095-01	BRCA	3.462054015	5.269331029
702	TCGA-A8-A096-01	BRCA	0.784664334	4.745133251
703	TCGA-A8-A097-01	BRCA	2.394869071	4.141994308
704	TCGA-A8-A099-01	BRCA	0.848349779	3.139429607
705	TCGA-A8-A09A-01	BRCA	5.579933467	5.804316013
706	TCGA-A8-A09B-01	BRCA	1.135406784	4.047561209
707	TCGA-A8-A09D-01	BRCA	1.086035883	5.627657364
708	TCGA-A8-A09G-01	BRCA	6.399085483	4.622504051
709	TCGA-A8-A09I-01	BRCA	3.29937308	5.037301859
710	TCGA-A8-A09M-01	BRCA	3.51114068	4.371578373
711	TCGA-A8-A09N-01	BRCA	1.621046029	5.345293169
712	TCGA-A8-A09Q-01	BRCA	3.622870228	3.666774223
713	TCGA-A8-A09R-01	BRCA	1.820362439	5.382513888
714	TCGA-A8-A09T-01	BRCA	0.63116202	3.480742926
715	TCGA-A8-A09V-01	BRCA	0.647602263	4.687857158
716	TCGA-A8-A09W-01	BRCA	2.149650493	6.310518836
717	TCGA-A8-A09X-01	BRCA	1.361181675	5.254006419
718	TCGA-A8-A09Z-01	BRCA	29.93253581	4.034672087
719	TCGA-A8-A0A1-01	BRCA	1.25571466	3.793988806
720	TCGA-A8-A0A2-01	BRCA	0.690446891	4.446917201
721	TCGA-A8-A0A4-01	BRCA	0.612394528	4.561132343
722	TCGA-A8-A0A6-01	BRCA	0.724418496	3.232752623
723	TCGA-A8-A0A7-01	BRCA	4.782553955	4.218929652
724	TCGA-A8-A0A9-01	BRCA	1.50656336	4.847373941
725	TCGA-A8-A0AB-01	BRCA	0.726116384	5.055648076
726	TCGA-A8-A0AD-01	BRCA	0.70752214	4.75968895
727	TCGA-AC-A23C-01	BRCA	3.192250297	4.15784879
728	TCGA-AC-A23E-01	BRCA	0.461466881	3.985851061
729	TCGA-AC-A23G-01	BRCA	0	3.681093028
730	TCGA-AC-A23H-01	BRCA	113.6536352	5.192820996
731	TCGA-AC-A2B8-01	BRCA	2.25097606	3.406637252
732	TCGA-AC-A2BK-01	BRCA	1.651754118	6.504982663
733	TCGA-AC-A2BM-01	BRCA	0.350238706	5.70669448
734	TCGA-AC-A2FB-01	BRCA	0.274964576	3.696337064
735	TCGA-AC-A2FE-01	BRCA	0	4.351812273
736	TCGA-AC-A2FF-01	BRCA	0.250711543	3.905623519
737	TCGA-AC-A2FG-01	BRCA	0.837094367	2.744733682
738	TCGA-AC-A2FK-01	BRCA	0	1.133704885
739	TCGA-AC-A2FM-01	BRCA	0	6.599027809
740	TCGA-AC-A2FO-01	BRCA	0.638338815	4.816051328
741	TCGA-AC-A2QH-01	BRCA	0.623028504	1.893766617
742	TCGA-AC-A2QI-01	BRCA	0	2.772005252
743	TCGA-AC-A2QJ-01	BRCA	0	3.105300331
744	TCGA-AC-A3BB-01	BRCA	0	2.713282455
745	TCGA-AC-A3EH-01	BRCA	0	3.97895156
746	TCGA-AC-A3HN-01	BRCA	0.227502903	3.936717538
747	TCGA-AC-A3OD-01	BRCA	0.516420893	1.595282757
748	TCGA-AC-A3QP-01	BRCA	0.444361566	1.596808073
749	TCGA-AC-A3QQ-01	BRCA	0.51902462	1.819709033
750	TCGA-AC-A3TM-01	BRCA	0	4.695773797
751	TCGA-AC-A3TN-01	BRCA	0	2.28926134
752	TCGA-AC-A3W5-01	BRCA	2.285389247	2.906697336
753	TCGA-AC-A3W6-01	BRCA	0	4.070796318
754	TCGA-AC-A3W7-01	BRCA	0	3.771801514
755	TCGA-AC-A3YI-01	BRCA	0.26400976	3.486015047
756	TCGA-AC-A3YJ-01	BRCA	0.331015606	3.684750358
757	TCGA-AC-A4ZE-01	BRCA	0.953817521	4.995449044
758	TCGA-AC-A5EH-01	BRCA	2.741678057	4.090560422
759	TCGA-AC-A5XS-01	BRCA	8.565477963	4.414676787
760	TCGA-AC-A5XU-01	BRCA	1.126761807	4.920068444
761	TCGA-AC-A62V-01	BRCA	1.386868203	6.544836599
762	TCGA-AC-A62X-01	BRCA	1.133994427	5.781209171
763	TCGA-AC-A62Y-01	BRCA	1.232267889	3.872169332
764	TCGA-AC-A6IV-01	BRCA	0.319141659	4.03479917
765	TCGA-AC-A6IW-01	BRCA	2.538996469	6.63588884
766	TCGA-AC-A6IX-01	BRCA	1.031780716	4.234589253
767	TCGA-AC-A6NO-01	BRCA	0.479263938	4.843456675
768	TCGA-AC-A7VB-01	BRCA	0.471412597	5.588235408
769	TCGA-AC-A7VC-01	BRCA	0.275659007	4.609929743
770	TCGA-AC-A8OP-01	BRCA	2.817719067	2.602250535
771	TCGA-AC-A8OQ-01	BRCA	1.422127704	4.410839307
772	TCGA-AC-A8OR-01	BRCA	0.291334238	3.684670349
773	TCGA-AC-A8OS-01	BRCA	0.849350425	2.8509634
774	TCGA-AN-A03X-01	BRCA	1.030065366	4.6245426
775	TCGA-AN-A03Y-01	BRCA	0.749388384	4.656721714
776	TCGA-AN-A041-01	BRCA	0.67536085	3.90066498
777	TCGA-AN-A046-01	BRCA	151.4675821	3.459569028
778	TCGA-AN-A049-01	BRCA	0.777855928	4.193961917
779	TCGA-AN-A04A-01	BRCA	1.00084321	3.993616564
780	TCGA-AN-A04C-01	BRCA	1.752274856	3.231757685
781	TCGA-AN-A04D-01	BRCA	2.11376929	6.015930751
782	TCGA-AN-A0AJ-01	BRCA	2.071553002	5.420463475
783	TCGA-AN-A0AK-01	BRCA	30.67376605	6.691024767
784	TCGA-AN-A0AL-01	BRCA	2.084453088	5.780107611
785	TCGA-AN-A0AM-01	BRCA	2.219249863	4.670102509
786	TCGA-AN-A0AR-01	BRCA	3.01553486	4.88245977
787	TCGA-AN-A0AS-01	BRCA	1.082843612	3.172051138
788	TCGA-AN-A0AT-01	BRCA	3.104127539	5.597727411
789	TCGA-AN-A0FD-01	BRCA	0.878179755	3.465450011
790	TCGA-AN-A0FF-01	BRCA	0.475618708	5.508570521
791	TCGA-AN-A0FJ-01	BRCA	2.225142585	5.668880501
792	TCGA-AN-A0FK-01	BRCA	0.882453519	4.789861922
793	TCGA-AN-A0FL-01	BRCA	4.186133262	3.547360885
794	TCGA-AN-A0FN-01	BRCA	0.920501019	3.51150527
795	TCGA-AN-A0FS-01	BRCA	1.548406615	3.037648208
796	TCGA-AN-A0FT-01	BRCA	2.1734985	2.113892076
797	TCGA-AN-A0FV-01	BRCA	1.99905528	4.414023059
798	TCGA-AN-A0FW-01	BRCA	2.780547357	5.177365969
799	TCGA-AN-A0FX-01	BRCA	3.102956233	4.414724136
800	TCGA-AN-A0FY-01	BRCA	1.221399677	4.484148325
801	TCGA-AN-A0FZ-01	BRCA	1.478323583	3.656255328
802	TCGA-AN-A0G0-01	BRCA	0.856091528	6.093878439
803	TCGA-AN-A0XL-01	BRCA	0.848195896	3.188206738
804	TCGA-AN-A0XN-01	BRCA	3.627104529	3.378167296
805	TCGA-AN-A0XO-01	BRCA	0.94428849	3.516490564
806	TCGA-AN-A0XP-01	BRCA	0.685723583	3.358953046
807	TCGA-AN-A0XR-01	BRCA	0.782239601	5.506358732
808	TCGA-AN-A0XS-01	BRCA	0.640865202	2.723230262
809	TCGA-AN-A0XT-01	BRCA	0.295681406	2.745440547
810	TCGA-AN-A0XU-01	BRCA	3.189158362	5.498631817
811	TCGA-AN-A0XV-01	BRCA	0.834925579	4.383935769
812	TCGA-AN-A0XW-01	BRCA	8.018824918	5.13821126
813	TCGA-AO-A03L-01	BRCA	0.897515207	5.79336551
814	TCGA-AO-A03M-01	BRCA	19.44442479	4.969660977
815	TCGA-AO-A03N-01	BRCA	2.432615548	3.471846922
816	TCGA-AO-A03O-01	BRCA	1.900938698	4.516703063
817	TCGA-AO-A03P-01	BRCA	0.98951935	3.603326261
818	TCGA-AO-A03R-01	BRCA	0.982863742	5.009534632
819	TCGA-AO-A03T-01	BRCA	2.354313228	4.152010591
820	TCGA-AO-A03U-01	BRCA	0.115861671	2.145548493
821	TCGA-AO-A03V-01	BRCA	1.465410306	3.300872914
822	TCGA-AO-A0J2-01	BRCA	1.477216946	4.898035425
823	TCGA-AO-A0J3-01	BRCA	2.124256245	4.255321577
824	TCGA-AO-A0J4-01	BRCA	2.587283381	4.561969368
825	TCGA-AO-A0J5-01	BRCA	1.270285282	3.546869265
826	TCGA-AO-A0J6-01	BRCA	2.693685274	5.131330751
827	TCGA-AO-A0J7-01	BRCA	0.452174897	6.026287262
828	TCGA-AO-A0J8-01	BRCA	0.548902281	3.586181287
829	TCGA-AO-A0J9-01	BRCA	2.716558411	2.773071398
830	TCGA-AO-A0JA-01	BRCA	0.653178205	5.631651915
831	TCGA-AO-A0JB-01	BRCA	2.668535091	1.644400611
832	TCGA-AO-A0JC-01	BRCA	3.487316229	3.470121136
833	TCGA-AO-A0JD-01	BRCA	2.87062582	6.960859502
834	TCGA-AO-A0JE-01	BRCA	1.21407632	3.145523063
835	TCGA-AO-A0JF-01	BRCA	0.666320682	3.770876666
836	TCGA-AO-A0JG-01	BRCA	0.418528683	2.181305156
837	TCGA-AO-A0JI-01	BRCA	0.386715179	5.446654375
838	TCGA-AO-A0JJ-01	BRCA	0.432571604	4.525179304
839	TCGA-AO-A0JM-01	BRCA	0.957627354	6.633622949
840	TCGA-AO-A124-01	BRCA	3.674361229	5.118932151
841	TCGA-AO-A125-01	BRCA	0.767745182	2.914571985
842	TCGA-AO-A126-01	BRCA	0.459951197	3.040317612
843	TCGA-AO-A128-01	BRCA	22.89573015	4.577273633
844	TCGA-AO-A129-01	BRCA	2.827034136	4.694305053
845	TCGA-AO-A12A-01	BRCA	0.393542463	3.944818441
846	TCGA-AO-A12B-01	BRCA	0.525328724	4.653717002
847	TCGA-AO-A12D-01	BRCA	1.355291152	3.624122681
848	TCGA-AO-A12E-01	BRCA	0.767216576	4.806589475
849	TCGA-AO-A12F-01	BRCA	1.001630153	5.359874083
850	TCGA-AO-A12G-01	BRCA	0.954886149	2.862129555
851	TCGA-AO-A12H-01	BRCA	0.555485876	4.277133337
852	TCGA-AO-A1KO-01	BRCA	0	1.333160345
853	TCGA-AO-A1KP-01	BRCA	0.463877647	4.568600469
854	TCGA-AO-A1KR-01	BRCA	1.980534169	3.989427483
855	TCGA-AO-A1KS-01	BRCA	0.895619141	7.031447575
856	TCGA-AO-A1KT-01	BRCA	0.91852768	4.94043661
857	TCGA-AQ-A04H-01	BRCA	1.709848397	5.480889034
858	TCGA-AQ-A04J-01	BRCA	1.790853195	5.139099399
859	TCGA-AQ-A0Y5-01	BRCA	1.510494706	2.48654569
860	TCGA-AQ-A1H2-01	BRCA	0.634276521	2.657493616
861	TCGA-AQ-A1H3-01	BRCA	0.595558687	5.279201055
862	TCGA-AQ-A54N-01	BRCA	0	4.687939525
863	TCGA-AQ-A54O-01	BRCA	0.408142354	3.970995498
864	TCGA-AQ-A7U7-01	BRCA	1.029021802	4.006104729
865	TCGA-AR-A0TP-01	BRCA	1.400582233	4.685396728
866	TCGA-AR-A0TQ-01	BRCA	0.826122227	5.859450784
867	TCGA-AR-A0TR-01	BRCA	0.786118215	3.875387083
868	TCGA-AR-A0TS-01	BRCA	1.604157481	4.486933265
869	TCGA-AR-A0TT-01	BRCA	1.337760178	2.920271147
870	TCGA-AR-A0TU-01	BRCA	1.759486989	6.451584731
871	TCGA-AR-A0TV-01	BRCA	1.508402978	4.856458164
872	TCGA-AR-A0TW-01	BRCA	1.436952531	2.999781811
873	TCGA-AR-A0TX-01	BRCA	7.100048254	3.757252275
874	TCGA-AR-A0TY-01	BRCA	2.004086926	7.02025824
875	TCGA-AR-A0TZ-01	BRCA	1.429344546	6.240792439
876	TCGA-AR-A0U0-01	BRCA	1.055831654	5.331200221
877	TCGA-AR-A0U2-01	BRCA	1.30445968	7.168800011
878	TCGA-AR-A0U3-01	BRCA	0.760895845	5.233658096
879	TCGA-AR-A0U4-01	BRCA	4.238782432	5.066632043
880	TCGA-AR-A1AH-01	BRCA	1.941159365	6.558709288
881	TCGA-AR-A1AI-01	BRCA	1.992954876	5.927788579
882	TCGA-AR-A1AJ-01	BRCA	0.900665543	4.410867857
883	TCGA-AR-A1AK-01	BRCA	1.529847662	3.600075506
884	TCGA-AR-A1AL-01	BRCA	0.602882667	4.229505276
885	TCGA-AR-A1AM-01	BRCA	0	1.9940498
886	TCGA-AR-A1AN-01	BRCA	0.569057607	3.61216168
887	TCGA-AR-A1AO-01	BRCA	2.053465483	3.033928284
888	TCGA-AR-A1AP-01	BRCA	0.81561609	3.340835715
889	TCGA-AR-A1AQ-01	BRCA	0.91474511	6.343592631
890	TCGA-AR-A1AR-01	BRCA	1.187534793	6.002606537
891	TCGA-AR-A1AS-01	BRCA	0.786977814	3.757070656
892	TCGA-AR-A1AT-01	BRCA	0.701970189	3.817791953
893	TCGA-AR-A1AU-01	BRCA	0.510862918	4.394276346
894	TCGA-AR-A1AV-01	BRCA	1.07362901	3.887625348
895	TCGA-AR-A1AW-01	BRCA	0.703304522	3.94166699
896	TCGA-AR-A1AX-01	BRCA	0.581341286	4.044321591
897	TCGA-AR-A1AY-01	BRCA	1.360185018	6.726519086
898	TCGA-AR-A24H-01	BRCA	3.5989204	4.819649083
899	TCGA-AR-A24K-01	BRCA	0.725421932	5.487427087
900	TCGA-AR-A24L-01	BRCA	1.05912078	4.419217121
901	TCGA-AR-A24M-01	BRCA	0.385342108	3.796799133
902	TCGA-AR-A24N-01	BRCA	0.939615245	5.567101055
903	TCGA-AR-A24O-01	BRCA	0.488220489	4.544846061
904	TCGA-AR-A24P-01	BRCA	0.579859414	5.056846705
905	TCGA-AR-A24Q-01	BRCA	4.169789696	5.753023002
906	TCGA-AR-A24R-01	BRCA	0.624646992	5.62960445
907	TCGA-AR-A24S-01	BRCA	1.180367832	3.99465392
908	TCGA-AR-A24T-01	BRCA	0.568956068	3.313168056
909	TCGA-AR-A24U-01	BRCA	0.738144332	4.623772897
910	TCGA-AR-A24V-01	BRCA	0.574271587	2.906436514
911	TCGA-AR-A24W-01	BRCA	0.280932478	3.193566786
912	TCGA-AR-A24X-01	BRCA	0.719844607	4.694125173
913	TCGA-AR-A24Z-01	BRCA	1.128337775	4.035451144
914	TCGA-AR-A250-01	BRCA	3.046512647	4.337085989
915	TCGA-AR-A251-01	BRCA	4.662879312	6.107768712
916	TCGA-AR-A252-01	BRCA	0.322497032	4.584096272
917	TCGA-AR-A254-01	BRCA	0.889587438	4.937134331
918	TCGA-AR-A255-01	BRCA	1.78072169	3.882432775
919	TCGA-AR-A256-01	BRCA	4.682041412	6.410431122
920	TCGA-AR-A2LE-01	BRCA	6.848463595	2.475289483
921	TCGA-AR-A2LH-01	BRCA	1.432256983	4.273409459
922	TCGA-AR-A2LJ-01	BRCA	0	3.320749205
923	TCGA-AR-A2LK-01	BRCA	0.848895954	5.520966612
924	TCGA-AR-A2LM-01	BRCA	0.299386065	2.835240333
925	TCGA-AR-A2LN-01	BRCA	0.889143909	1.539303782
926	TCGA-AR-A2LO-01	BRCA	0.318790045	4.121880047
927	TCGA-AR-A2LQ-01	BRCA	0.203060434	2.660129731
928	TCGA-AR-A5QM-01	BRCA	0.536370585	3.823536756
929	TCGA-AR-A5QN-01	BRCA	0.664679931	3.687149667
930	TCGA-AR-A5QP-01	BRCA	0.480059129	5.481487324
931	TCGA-AR-A5QQ-01	BRCA	1.353373303	5.397008621
932	TCGA-B6-A0I1-01	BRCA	1.042604921	4.401024411
933	TCGA-B6-A0I2-01	BRCA	1.291630007	3.014030236
934	TCGA-B6-A0I5-01	BRCA	0.504632244	3.988229279
935	TCGA-B6-A0I8-01	BRCA	2.90967247	3.421631026
936	TCGA-B6-A0I9-01	BRCA	1.960806448	4.867442312
937	TCGA-B6-A0IA-01	BRCA	0.620012702	3.80447198
938	TCGA-B6-A0IB-01	BRCA	1.60334118	5.401540252
939	TCGA-B6-A0IC-01	BRCA	0.841129932	4.593713627
940	TCGA-B6-A0IE-01	BRCA	0.634218661	4.279470561
941	TCGA-B6-A0IG-01	BRCA	0.977626741	4.390571716
942	TCGA-B6-A0IH-01	BRCA	0.840722812	1.625942638
943	TCGA-B6-A0IJ-01	BRCA	3.842676843	4.94688992
944	TCGA-B6-A0IK-01	BRCA	3.28996439	4.18936591
945	TCGA-B6-A0IM-01	BRCA	0.744270256	4.296703563
946	TCGA-B6-A0IN-01	BRCA	0.800608019	3.113486155
947	TCGA-B6-A0IO-01	BRCA	1.500708674	3.983095041
948	TCGA-B6-A0IP-01	BRCA	0.855099453	4.293468101
949	TCGA-B6-A0IQ-01	BRCA	1.79157497	5.037435812
950	TCGA-B6-A0RE-01	BRCA	3.836701703	5.247963692
951	TCGA-B6-A0RG-01	BRCA	1.779178819	3.61979299
952	TCGA-B6-A0RH-01	BRCA	0.972625511	3.723594548
953	TCGA-B6-A0RI-01	BRCA	0.526600508	5.135076043
954	TCGA-B6-A0RL-01	BRCA	1.218730424	5.074675968
955	TCGA-B6-A0RM-01	BRCA	0.74257777	3.57810931
956	TCGA-B6-A0RN-01	BRCA	0.611294245	2.856889647
957	TCGA-B6-A0RO-01	BRCA	0.895094279	3.877611083
958	TCGA-B6-A0RP-01	BRCA	0.52070654	3.434064125
959	TCGA-B6-A0RQ-01	BRCA	0.912502179	1.802432451
960	TCGA-B6-A0RS-01	BRCA	3.52588358	3.403796697
961	TCGA-B6-A0RT-01	BRCA	1.326770768	5.868850044
962	TCGA-B6-A0RU-01	BRCA	1.295532927	6.143133646
963	TCGA-B6-A0RV-01	BRCA	1.028556436	4.079251092
964	TCGA-B6-A0WS-01	BRCA	0.331874584	3.857278356
965	TCGA-B6-A0WT-01	BRCA	0.422427305	4.246227219
966	TCGA-B6-A0WV-01	BRCA	0.669083895	5.084019153
967	TCGA-B6-A0WW-01	BRCA	0.777026839	4.232503468
968	TCGA-B6-A0WX-01	BRCA	0.661524469	4.017155557
969	TCGA-B6-A0WY-01	BRCA	0.832976889	2.420197353
970	TCGA-B6-A0WZ-01	BRCA	1.780111532	4.039924466
971	TCGA-B6-A0X0-01	BRCA	0.438673897	3.186019117
972	TCGA-B6-A0X1-01	BRCA	1.990829555	7.517489458
973	TCGA-B6-A0X4-01	BRCA	0.552369661	3.498776596
974	TCGA-B6-A0X5-01	BRCA	1.061765325	5.350139475
975	TCGA-B6-A0X7-01	BRCA	0.338810191	2.329618339
976	TCGA-B6-A1KC-01	BRCA	0.668910964	4.477901128
977	TCGA-B6-A1KF-01	BRCA	1.36141713	5.930043855
978	TCGA-B6-A1KI-01	BRCA	0.489045862	2.462618362
979	TCGA-B6-A1KN-01	BRCA	1.519637772	5.549387105
980	TCGA-B6-A2IU-01	BRCA	0.970181983	5.004231378
981	TCGA-B6-A3ZX-01	BRCA	0	5.29527261
982	TCGA-B6-A400-01	BRCA	0	5.854089441
983	TCGA-B6-A401-01	BRCA	0.352259968	2.325496322
984	TCGA-B6-A402-01	BRCA	0	4.708010438
985	TCGA-B6-A408-01	BRCA	0	2.231079834
986	TCGA-B6-A409-01	BRCA	0.624213505	4.144243646
987	TCGA-B6-A40B-01	BRCA	0.834727096	4.332764109
988	TCGA-B6-A40C-01	BRCA	0.702327615	4.26683517
989	TCGA-BH-A0AU-01	BRCA	0.455885881	5.48216098
990	TCGA-BH-A0AV-01	BRCA	1.409175776	4.924411821
991	TCGA-BH-A0AW-01	BRCA	3.659348422	4.124419897
992	TCGA-BH-A0AY-01	BRCA	1.290694626	3.717268704
993	TCGA-BH-A0AZ-01	BRCA	1.428604283	2.710737793
994	TCGA-BH-A0B0-01	BRCA	1.482302747	3.147412246
995	TCGA-BH-A0B1-01	BRCA	1.259769585	4.62349303
996	TCGA-BH-A0B3-01	BRCA	0.973981711	5.847344905
997	TCGA-BH-A0B4-01	BRCA	1.818324938	5.220624633
998	TCGA-BH-A0B5-01	BRCA	1.582871885	5.533968275
999	TCGA-BH-A0B7-01	BRCA	0.860039359	3.32178583
1000	TCGA-BH-A0B8-01	BRCA	1.288653837	3.961045564
1001	TCGA-BH-A0B9-01	BRCA	0.808244696	5.155390944
1002	TCGA-BH-A0BA-01	BRCA	0.92999226	5.493951702
1003	TCGA-BH-A0BC-01	BRCA	0.781812938	4.82597642
1004	TCGA-BH-A0BD-01	BRCA	0.783068603	6.043148401
1005	TCGA-BH-A0BF-01	BRCA	0.503018334	4.379204452
1006	TCGA-BH-A0BG-01	BRCA	0.912862504	4.419508784
1007	TCGA-BH-A0BJ-01	BRCA	0.736181476	3.753198815
1008	TCGA-BH-A0BL-01	BRCA	1.478763186	5.706675434
1009	TCGA-BH-A0BM-01	BRCA	0.56704281	1.596139425
1010	TCGA-BH-A0BO-01	BRCA	0.663273642	2.670430375
1011	TCGA-BH-A0BP-01	BRCA	3.524411405	3.132745572
1012	TCGA-BH-A0BQ-01	BRCA	0.509398278	3.117797374
1013	TCGA-BH-A0BR-01	BRCA	1.28807663	3.288484211
1014	TCGA-BH-A0BT-01	BRCA	1.013463069	3.25112628
1015	TCGA-BH-A0BV-01	BRCA	0.746391823	3.439170491
1016	TCGA-BH-A0BW-01	BRCA	1.97508204	5.201359338
1017	TCGA-BH-A0BZ-01	BRCA	6.153157882	5.798771368
1018	TCGA-BH-A0C0-01	BRCA	2.688448248	3.593327681
1019	TCGA-BH-A0C1-01	BRCA	0.800237873	5.14009065
1020	TCGA-BH-A0C3-01	BRCA	0.27297469	4.51338858
1021	TCGA-BH-A0C7-01	BRCA	1.123936605	5.531838568
1022	TCGA-BH-A0DD-01	BRCA	0.543643481	6.79867327
1023	TCGA-BH-A0DE-01	BRCA	0.682762911	3.672627313
1024	TCGA-BH-A0DG-01	BRCA	0.875162261	3.424776285
1025	TCGA-BH-A0DH-01	BRCA	0.91626565	4.759095967
1026	TCGA-BH-A0DI-01	BRCA	0.981781945	2.599738455
1027	TCGA-BH-A0DK-01	BRCA	2.38114451	4.288807144
1028	TCGA-BH-A0DL-01	BRCA	1.219520084	4.041663864
1029	TCGA-BH-A0DO-01	BRCA	0.529390209	2.253547265
1030	TCGA-BH-A0DP-01	BRCA	0.703229193	4.021550066
1031	TCGA-BH-A0DQ-01	BRCA	0.812578675	4.243413728
1032	TCGA-BH-A0DS-01	BRCA	1.031569579	2.776552612
1033	TCGA-BH-A0DT-01	BRCA	0.425495691	4.087160581
1034	TCGA-BH-A0DV-01	BRCA	0.353242737	2.626538174
1035	TCGA-BH-A0DX-01	BRCA	1.475485183	3.942010051
1036	TCGA-BH-A0DZ-01	BRCA	5.947228261	5.243093273
1037	TCGA-BH-A0E0-01	BRCA	0.826675964	4.874313533
1038	TCGA-BH-A0E1-01	BRCA	0.62718799	6.317632225
1039	TCGA-BH-A0E2-01	BRCA	1.102844842	5.239786004
1040	TCGA-BH-A0E6-01	BRCA	1.659906283	4.828920239
1041	TCGA-BH-A0E7-01	BRCA	1.045705705	3.170581975
1042	TCGA-BH-A0E9-01	BRCA	0.727802332	3.465320019
1043	TCGA-BH-A0EA-01	BRCA	0.645043431	1.280648406
1044	TCGA-BH-A0EB-01	BRCA	1.227147377	3.224741143
1045	TCGA-BH-A0EE-01	BRCA	3.167615125	4.329271446
1046	TCGA-BH-A0EI-01	BRCA	0.433010384	3.764214985
1047	TCGA-BH-A0GY-01	BRCA	0.953904797	3.956817316
1048	TCGA-BH-A0GZ-01	BRCA	0.911967565	4.337249367
1049	TCGA-BH-A0H0-01	BRCA	0.511528791	5.598640347
1050	TCGA-BH-A0H3-01	BRCA	0.347189608	3.255927501
1051	TCGA-BH-A0H5-01	BRCA	2.712727278	3.409813452
1052	TCGA-BH-A0H6-01	BRCA	0.460866885	2.921678129
1053	TCGA-BH-A0H7-01	BRCA	1.445047455	4.332717871
1054	TCGA-BH-A0H9-01	BRCA	0.9687105	4.157045028
1055	TCGA-BH-A0HA-01	BRCA	7.751449843	3.690526424
1056	TCGA-BH-A0HB-01	BRCA	0.92855514	5.088651739
1057	TCGA-BH-A0HF-01	BRCA	23.08289305	3.38540407
1058	TCGA-BH-A0HI-01	BRCA	0.761047171	3.703887539
1059	TCGA-BH-A0HK-01	BRCA	2.316156833	2.331508532
1060	TCGA-BH-A0HL-01	BRCA	0.85519817	5.385040998
1061	TCGA-BH-A0HN-01	BRCA	0.627702859	3.756232953
1062	TCGA-BH-A0HO-01	BRCA	0.397996293	4.233299258
1063	TCGA-BH-A0HP-01	BRCA	6.225166832	5.041218841
1064	TCGA-BH-A0HQ-01	BRCA	0.736167234	3.924879921
1065	TCGA-BH-A0HU-01	BRCA	0.710836411	4.589996434
1066	TCGA-BH-A0HW-01	BRCA	0.855882492	4.414695821
1067	TCGA-BH-A0HX-01	BRCA	1.70464949	4.492717433
1068	TCGA-BH-A0HY-01	BRCA	1.48383889	4.714602247
1069	TCGA-BH-A0RX-01	BRCA	0.848404686	4.522786135
1070	TCGA-BH-A0W3-01	BRCA	0.453891115	5.105713432
1071	TCGA-BH-A0W4-01	BRCA	0.964568205	4.304887365
1072	TCGA-BH-A0W5-01	BRCA	0.633362188	2.839651152
1073	TCGA-BH-A0W7-01	BRCA	4.188796505	5.115062693
1074	TCGA-BH-A0WA-01	BRCA	2.380078685	4.183875947
1075	TCGA-BH-A18F-01	BRCA	1.237349712	4.981701662
1076	TCGA-BH-A18G-01	BRCA	30.54459751	4.424553537
1077	TCGA-BH-A18H-01	BRCA	0.968169948	2.276901128
1078	TCGA-BH-A18I-01	BRCA	0.614152515	3.472811844
1079	TCGA-BH-A18J-01	BRCA	1.763806483	3.631045841
1080	TCGA-BH-A18K-01	BRCA	0.976068799	3.24743223
1081	TCGA-BH-A18L-01	BRCA	1.02470781	5.68450557
1082	TCGA-BH-A18M-01	BRCA	0.314419853	4.320542428
1083	TCGA-BH-A18N-01	BRCA	0.814667676	2.270770981
1084	TCGA-BH-A18P-01	BRCA	6.969343949	6.080999398
1085	TCGA-BH-A18Q-01	BRCA	1.970854305	4.60455788
1086	TCGA-BH-A18R-01	BRCA	0.766435826	6.415004627
1087	TCGA-BH-A18S-01	BRCA	0.636634002	2.500126488
1088	TCGA-BH-A18T-01	BRCA	1.749068088	5.668083037
1089	TCGA-BH-A18U-01	BRCA	2.858194128	6.053218407
1090	TCGA-BH-A1EN-01	BRCA	1.604974237	4.097110076
1091	TCGA-BH-A1EO-01	BRCA	1.040781391	3.740238873
1092	TCGA-BH-A1ET-01	BRCA	0.620773293	2.700818754
1093	TCGA-BH-A1EU-01	BRCA	0.554567911	3.834283771
1094	TCGA-BH-A1EV-01	BRCA	2.151395936	4.607967498
1095	TCGA-BH-A1EW-01	BRCA	0.339445024	3.767812986
1096	TCGA-BH-A1EX-01	BRCA	0.642597264	3.584475826
1097	TCGA-BH-A1EY-01	BRCA	0.913731305	2.424765746
1098	TCGA-BH-A1F0-01	BRCA	1.178033168	4.446042487
1099	TCGA-BH-A1F2-01	BRCA	1.363079128	4.562169628
1100	TCGA-BH-A1F6-01	BRCA	0.982860132	5.795161896
1101	TCGA-BH-A1F8-01	BRCA	3.52608158	2.704049787
1102	TCGA-BH-A1FC-01	BRCA	2.852372439	6.203766253
1103	TCGA-BH-A1FD-01	BRCA	0.854296566	4.839037049
1104	TCGA-BH-A1FG-01	BRCA	0.439085211	2.908192714
1105	TCGA-BH-A1FH-01	BRCA	0.602835734	2.154178606
1106	TCGA-BH-A1FJ-01	BRCA	0.651391185	6.209555801
1107	TCGA-BH-A1FL-01	BRCA	0.536500946	4.723630741
1108	TCGA-BH-A1FM-01	BRCA	1.296219314	5.790048042
1109	TCGA-BH-A1FN-01	BRCA	2.576428419	5.143559655
1110	TCGA-BH-A1FR-01	BRCA	0.381206865	4.96711517
1111	TCGA-BH-A1FU-01	BRCA	2.127336664	3.633199717
1112	TCGA-BH-A201-01	BRCA	0.521188708	4.054881509
1113	TCGA-BH-A202-01	BRCA	0.679158966	5.345464522
1114	TCGA-BH-A203-01	BRCA	1.620358423	4.488967682
1115	TCGA-BH-A204-01	BRCA	0.979792839	5.913484825
1116	TCGA-BH-A208-01	BRCA	1.601203747	1.925872192
1117	TCGA-BH-A209-01	BRCA	2.304734161	4.947085198
1118	TCGA-BH-A28O-01	BRCA	0	1.962422469
1119	TCGA-BH-A28Q-01	BRCA	0.442468361	2.661806371
1120	TCGA-BH-A2L8-01	BRCA	11.3894191	3.418402664
1121	TCGA-BH-A42T-01	BRCA	0	5.232307336
1122	TCGA-BH-A42U-01	BRCA	0.250111595	2.328571784
1123	TCGA-BH-A42V-01	BRCA	0.788788293	2.131262043
1124	TCGA-BH-A5IZ-01	BRCA	1.253567743	6.617161396
1125	TCGA-BH-A5J0-01	BRCA	1.299065799	2.681063254
1126	TCGA-BH-A6R8-01	BRCA	0.59702921	4.082604541
1127	TCGA-BH-A6R9-01	BRCA	0.220171108	2.961367616
1128	TCGA-BH-A8FY-01	BRCA	0.774247513	4.261160069
1129	TCGA-BH-A8FZ-01	BRCA	1.132286784	2.542609473
1130	TCGA-BH-A8G0-01	BRCA	0.172631245	2.194962633
1131	TCGA-BH-AB28-01	BRCA	0.536562318	3.340971149
1132	TCGA-C8-A12K-01	BRCA	3.055319953	6.110739663
1133	TCGA-C8-A12L-01	BRCA	1.894739001	4.706205833
1134	TCGA-C8-A12M-01	BRCA	1.428859522	3.276619179
1135	TCGA-C8-A12N-01	BRCA	0.44059015	2.50093161
1136	TCGA-C8-A12O-01	BRCA	0.861352433	4.198947711
1137	TCGA-C8-A12P-01	BRCA	3.796329387	3.636727577
1138	TCGA-C8-A12Q-01	BRCA	2.655606489	3.751262899
1139	TCGA-C8-A12T-01	BRCA	4.087693108	6.062848656
1140	TCGA-C8-A12U-01	BRCA	1.196595724	5.750494991
1141	TCGA-C8-A12V-01	BRCA	1.00309452	5.333058502
1142	TCGA-C8-A12W-01	BRCA	1.33552196	4.378838786
1143	TCGA-C8-A12X-01	BRCA	1.127457173	3.91051654
1144	TCGA-C8-A12Y-01	BRCA	0.672240563	3.473254846
1145	TCGA-C8-A12Z-01	BRCA	1.198040892	4.604479936
1146	TCGA-C8-A130-01	BRCA	0.797736958	5.318591239
1147	TCGA-C8-A131-01	BRCA	1.512583307	3.536777046
1148	TCGA-C8-A132-01	BRCA	1.63663892	3.231204817
1149	TCGA-C8-A133-01	BRCA	0.621981177	3.743342884
1150	TCGA-C8-A134-01	BRCA	2.157501842	5.910198028
1151	TCGA-C8-A135-01	BRCA	1.312133751	3.167030113
1152	TCGA-C8-A137-01	BRCA	1.091553117	5.701952518
1153	TCGA-C8-A138-01	BRCA	1.074777899	3.428976311
1154	TCGA-C8-A1HE-01	BRCA	1.069016205	4.065024023
1155	TCGA-C8-A1HF-01	BRCA	0.581011795	6.684963742
1156	TCGA-C8-A1HG-01	BRCA	0.946943293	4.962569249
1157	TCGA-C8-A1HI-01	BRCA	1.135801799	2.946346748
1158	TCGA-C8-A1HJ-01	BRCA	2.721194346	5.001653926
1159	TCGA-C8-A1HK-01	BRCA	1.533076178	4.715358219
1160	TCGA-C8-A1HL-01	BRCA	0.692510373	4.352049705
1161	TCGA-C8-A1HM-01	BRCA	7.700409622	6.162420276
1162	TCGA-C8-A1HN-01	BRCA	1.135153451	5.996335218
1163	TCGA-C8-A1HO-01	BRCA	0.741911495	4.500453369
1164	TCGA-C8-A26V-01	BRCA	1.867405993	5.047027982
1165	TCGA-C8-A26W-01	BRCA	1.264154124	5.266822008
1166	TCGA-C8-A26X-01	BRCA	1.884696934	2.604573339
1167	TCGA-C8-A26Y-01	BRCA	17.68335999	4.865027478
1168	TCGA-C8-A26Z-01	BRCA	1.135998082	4.91960768
1169	TCGA-C8-A273-01	BRCA	0.44320372	4.816696796
1170	TCGA-C8-A274-01	BRCA	5.145472183	4.469938193
1171	TCGA-C8-A275-01	BRCA	2.90054274	6.345375028
1172	TCGA-C8-A278-01	BRCA	0.990497563	3.609404235
1173	TCGA-C8-A27A-01	BRCA	0.65520394	6.459811795
1174	TCGA-C8-A27B-01	BRCA	3.53555466	5.006609199
1175	TCGA-C8-A3M7-01	BRCA	2.721153707	4.276447927
1176	TCGA-C8-A3M8-01	BRCA	0.932209927	3.784877441
1177	TCGA-C8-A8HP-01	BRCA	2.906011214	3.250268884
1178	TCGA-C8-A8HQ-01	BRCA	4.482005357	5.187365297
1179	TCGA-C8-A8HR-01	BRCA	0.811154008	4.385911737
1180	TCGA-D8-A13Y-01	BRCA	1.723083564	6.563273494
1181	TCGA-D8-A13Z-01	BRCA	2.056372621	3.403517386
1182	TCGA-D8-A140-01	BRCA	2.33541837	3.532666831
1183	TCGA-D8-A141-01	BRCA	0.465097802	3.457999162
1184	TCGA-D8-A142-01	BRCA	3.021997892	4.224149333
1185	TCGA-D8-A143-01	BRCA	1.202792123	4.837464357
1186	TCGA-D8-A145-01	BRCA	0.99115103	3.077145143
1187	TCGA-D8-A147-01	BRCA	3.588090937	5.709489489
1188	TCGA-D8-A1J8-01	BRCA	19.52844334	5.987935671
1189	TCGA-D8-A1J9-01	BRCA	4.659258072	3.756539153
1190	TCGA-D8-A1JA-01	BRCA	23.67672539	4.220790003
1191	TCGA-D8-A1JB-01	BRCA	0.883244597	2.911578201
1192	TCGA-D8-A1JC-01	BRCA	2.032505006	5.153213917
1193	TCGA-D8-A1JD-01	BRCA	2.63927842	5.1078845
1194	TCGA-D8-A1JE-01	BRCA	0.844672789	5.06585864
1195	TCGA-D8-A1JF-01	BRCA	1.187203023	5.334570886
1196	TCGA-D8-A1JG-01	BRCA	3.377413743	4.871462629
1197	TCGA-D8-A1JH-01	BRCA	0.520088216	3.172878763
1198	TCGA-D8-A1JI-01	BRCA	0.613897421	3.573414569
1199	TCGA-D8-A1JJ-01	BRCA	1.645886481	3.546045353
1200	TCGA-D8-A1JK-01	BRCA	5.069802071	2.747536865
1201	TCGA-D8-A1JL-01	BRCA	2.415593777	6.505756911
1202	TCGA-D8-A1JM-01	BRCA	0.978710228	5.601467756
1203	TCGA-D8-A1JN-01	BRCA	3.497377184	2.817063228
1204	TCGA-D8-A1JP-01	BRCA	2.601515337	4.621848458
1205	TCGA-D8-A1JS-01	BRCA	0.518041873	2.962789894
1206	TCGA-D8-A1JT-01	BRCA	0.658872227	5.058449959
1207	TCGA-D8-A1JU-01	BRCA	0.4160084	1.560094249
1208	TCGA-D8-A1X5-01	BRCA	1.22773966	3.217967335
1209	TCGA-D8-A1X6-01	BRCA	1.042071314	4.501398022
1210	TCGA-D8-A1X7-01	BRCA	0.557111227	4.524868097
1211	TCGA-D8-A1X8-01	BRCA	0.642840252	3.7722961
1212	TCGA-D8-A1X9-01	BRCA	2.511616142	4.276463621
1213	TCGA-D8-A1XA-01	BRCA	0.69576598	4.622257114
1214	TCGA-D8-A1XB-01	BRCA	0.842721295	4.395865119
1215	TCGA-D8-A1XC-01	BRCA	0.798516446	3.639768444
1216	TCGA-D8-A1XF-01	BRCA	0.855510109	6.352247263
1217	TCGA-D8-A1XG-01	BRCA	0.421769124	4.262878845
1218	TCGA-D8-A1XJ-01	BRCA	2.090001955	4.463669986
1219	TCGA-D8-A1XK-01	BRCA	25.45964852	6.597470017
1220	TCGA-D8-A1XL-01	BRCA	2.438457962	4.319729695
1221	TCGA-D8-A1XM-01	BRCA	1.235157814	4.181854672
1222	TCGA-D8-A1XO-01	BRCA	0.336137825	3.698282882
1223	TCGA-D8-A1XQ-01	BRCA	20.72633214	5.112863745
1224	TCGA-D8-A1XR-01	BRCA	0.627394508	5.457229332
1225	TCGA-D8-A1XS-01	BRCA	0.482374668	5.232329101
1226	TCGA-D8-A1XT-01	BRCA	0.922191851	4.558616159
1227	TCGA-D8-A1XU-01	BRCA	0.638047133	2.924465566
1228	TCGA-D8-A1XV-01	BRCA	0.691291082	4.367446486
1229	TCGA-D8-A1XW-01	BRCA	2.255425614	4.162312373
1230	TCGA-D8-A1XY-01	BRCA	1.080883481	3.442003715
1231	TCGA-D8-A1XZ-01	BRCA	1.840541209	4.672476595
1232	TCGA-D8-A1Y0-01	BRCA	1.505210819	4.940300417
1233	TCGA-D8-A1Y1-01	BRCA	5.672788175	6.78647729
1234	TCGA-D8-A1Y2-01	BRCA	0.431885423	3.667107909
1235	TCGA-D8-A1Y3-01	BRCA	1.21938399	5.155498694
1236	TCGA-D8-A27E-01	BRCA	0.249010426	2.214612888
1237	TCGA-D8-A27F-01	BRCA	1.495207128	4.853086426
1238	TCGA-D8-A27G-01	BRCA	23.11975015	4.630865615
1239	TCGA-D8-A27H-01	BRCA	3.441397364	4.259055873
1240	TCGA-D8-A27I-01	BRCA	0.811716668	3.900802344
1241	TCGA-D8-A27K-01	BRCA	0.579261381	3.423866162
1242	TCGA-D8-A27L-01	BRCA	0.963977275	2.284398587
1243	TCGA-D8-A27M-01	BRCA	1.65246991	4.309184936
1244	TCGA-D8-A27N-01	BRCA	1.138004418	5.101598635
1245	TCGA-D8-A27P-01	BRCA	0.486876028	3.701093916
1246	TCGA-D8-A27R-01	BRCA	0.752596821	5.376780374
1247	TCGA-D8-A27T-01	BRCA	0.530729918	4.481999548
1248	TCGA-D8-A27V-01	BRCA	85.7806835	4.435379838
1249	TCGA-D8-A27W-01	BRCA	1.033593096	5.186663705
1250	TCGA-D8-A3Z5-01	BRCA	0	2.343935317
1251	TCGA-D8-A3Z6-01	BRCA	0.524191757	2.194878257
1252	TCGA-D8-A4Z1-01	BRCA	0.59179985	2.429921732
1253	TCGA-D8-A73U-01	BRCA	2.39407708	1.487334111
1254	TCGA-D8-A73W-01	BRCA	0.775580988	4.394644612
1255	TCGA-D8-A73X-01	BRCA	0.562589576	3.63939277
1256	TCGA-E2-A105-01	BRCA	1.377618368	4.449659336
1257	TCGA-E2-A107-01	BRCA	0.653431297	6.16205185
1258	TCGA-E2-A108-01	BRCA	3.294623628	3.394642422
1259	TCGA-E2-A109-01	BRCA	1.588124125	4.433489156
1260	TCGA-E2-A10A-01	BRCA	0.526371751	4.835798684
1261	TCGA-E2-A10B-01	BRCA	1.13717612	4.415291479
1262	TCGA-E2-A10C-01	BRCA	9.42711148	4.560650082
1263	TCGA-E2-A10F-01	BRCA	0.581182677	4.594953162
1264	TCGA-E2-A14N-01	BRCA	1.7416918	5.428067314
1265	TCGA-E2-A14O-01	BRCA	0.804118997	5.155500777
1266	TCGA-E2-A14P-01	BRCA	1.641592212	3.738292558
1267	TCGA-E2-A14Q-01	BRCA	0.701994059	4.232232382
1268	TCGA-E2-A14R-01	BRCA	2.816397	5.731128964
1269	TCGA-E2-A14T-01	BRCA	0.853408013	3.859038489
1270	TCGA-E2-A14U-01	BRCA	0	0.828655585
1271	TCGA-E2-A14V-01	BRCA	2.583775141	5.778228159
1272	TCGA-E2-A14W-01	BRCA	2.251794479	4.707300825
1273	TCGA-E2-A14X-01	BRCA	0.565931933	4.185725987
1274	TCGA-E2-A14Y-01	BRCA	0.759916591	4.649828699
1275	TCGA-E2-A14Z-01	BRCA	1.56236896	5.347501199
1276	TCGA-E2-A150-01	BRCA	1.642168514	4.612401289
1277	TCGA-E2-A152-01	BRCA	2.973908428	4.338891985
1278	TCGA-E2-A153-01	BRCA	0.564040016	2.990290442
1279	TCGA-E2-A154-01	BRCA	1.122443409	5.060687227
1280	TCGA-E2-A155-01	BRCA	1.577366463	6.151288573
1281	TCGA-E2-A156-01	BRCA	0.617812258	4.311390528
1282	TCGA-E2-A158-01	BRCA	1.94730211	3.488559663
1283	TCGA-E2-A159-01	BRCA	3.215767283	5.786612399
1284	TCGA-E2-A15A-01	BRCA	1.279468368	5.171637742
1285	TCGA-E2-A15C-01	BRCA	0.732454421	2.49780662
1286	TCGA-E2-A15D-01	BRCA	0.770950664	2.980997319
1287	TCGA-E2-A15E-01	BRCA	0.892107464	2.964238909
1288	TCGA-E2-A15F-01	BRCA	0.578772716	4.003400994
1289	TCGA-E2-A15G-01	BRCA	1.329811161	3.140782846
1290	TCGA-E2-A15H-01	BRCA	0.748807257	4.351195518
1291	TCGA-E2-A15I-01	BRCA	0.612722359	1.978776689
1292	TCGA-E2-A15J-01	BRCA	0.502651925	3.3311808
1293	TCGA-E2-A15K-01	BRCA	1.037135262	4.391412748
1294	TCGA-E2-A15L-01	BRCA	0.749928335	5.621217179
1295	TCGA-E2-A15M-01	BRCA	1.894295213	4.285577147
1296	TCGA-E2-A15O-01	BRCA	0.708450862	4.401531027
1297	TCGA-E2-A15P-01	BRCA	0.691725615	3.59173625
1298	TCGA-E2-A15R-01	BRCA	0.859357083	5.200374204
1299	TCGA-E2-A15S-01	BRCA	1.27767488	5.860656987
1300	TCGA-E2-A15T-01	BRCA	0.78743069	4.887852259
1301	TCGA-E2-A1AZ-01	BRCA	1.274845449	6.966117039
1302	TCGA-E2-A1B0-01	BRCA	1.093611704	4.095636709
1303	TCGA-E2-A1B1-01	BRCA	1.117183282	3.91981548
1304	TCGA-E2-A1B4-01	BRCA	0.84223962	2.201512112
1305	TCGA-E2-A1B5-01	BRCA	0.787234723	2.89533365
1306	TCGA-E2-A1B6-01	BRCA	1.013847235	5.52058862
1307	TCGA-E2-A1BC-01	BRCA	0.773332942	1.378048352
1308	TCGA-E2-A1BD-01	BRCA	1.010502149	4.107844867
1309	TCGA-E2-A1IE-01	BRCA	0.494767844	4.799667506
1310	TCGA-E2-A1IF-01	BRCA	0.512220952	3.385243577
1311	TCGA-E2-A1IG-01	BRCA	1.152259127	3.068225061
1312	TCGA-E2-A1IH-01	BRCA	1.774625792	3.408647282
1313	TCGA-E2-A1II-01	BRCA	0.727366405	5.114116666
1314	TCGA-E2-A1IJ-01	BRCA	0.402807382	3.00963398
1315	TCGA-E2-A1IK-01	BRCA	0.363790336	4.271112917
1316	TCGA-E2-A1IL-01	BRCA	0.566539177	3.230188025
1317	TCGA-E2-A1IN-01	BRCA	4.31298455	3.0995658
1318	TCGA-E2-A1IO-01	BRCA	0.327600446	3.01931517
1319	TCGA-E2-A1IU-01	BRCA	0.440940729	3.803483318
1320	TCGA-E2-A1L6-01	BRCA	0.480038286	3.604290188
1321	TCGA-E2-A1L7-01	BRCA	1.842655811	5.443228134
1322	TCGA-E2-A1L8-01	BRCA	0.696567484	2.703598436
1323	TCGA-E2-A1L9-01	BRCA	0.637207458	3.921794867
1324	TCGA-E2-A1LA-01	BRCA	2.094557655	5.52092631
1325	TCGA-E2-A1LB-01	BRCA	1.079404412	3.560306789
1326	TCGA-E2-A1LE-01	BRCA	0	3.230527352
1327	TCGA-E2-A1LG-01	BRCA	3.66978425	4.428175488
1328	TCGA-E2-A1LH-01	BRCA	4.943481005	3.497084896
1329	TCGA-E2-A1LI-01	BRCA	0.735905287	5.478704596
1330	TCGA-E2-A1LK-01	BRCA	0.918030571	4.781042326
1331	TCGA-E2-A1LL-01	BRCA	1.047014847	4.480141649
1332	TCGA-E2-A1LS-01	BRCA	1.825772983	2.824143747
1333	TCGA-E2-A2P5-01	BRCA	0	5.07657141
1334	TCGA-E2-A2P6-01	BRCA	2.273734052	4.652437813
1335	TCGA-E2-A3DX-01	BRCA	0	2.584177302
1336	TCGA-E2-A56Z-01	BRCA	0.892162258	5.716048583
1337	TCGA-E2-A570-01	BRCA	0.410200698	4.623226382
1338	TCGA-E2-A572-01	BRCA	0.440348891	2.991053077
1339	TCGA-E2-A573-01	BRCA	0.869873387	5.47010094
1340	TCGA-E2-A574-01	BRCA	1.916370591	4.110021879
1341	TCGA-E2-A576-01	BRCA	1.015751795	4.450367584
1342	TCGA-E2-A9RU-01	BRCA	1.383392711	5.379570016
1343	TCGA-E9-A1N3-01	BRCA	0.685714095	4.577912362
1344	TCGA-E9-A1N4-01	BRCA	0.572294256	4.490652376
1345	TCGA-E9-A1N5-01	BRCA	0.846526687	5.393630901
1346	TCGA-E9-A1N8-01	BRCA	0.888817699	3.673967002
1347	TCGA-E9-A1N9-01	BRCA	1.119167692	3.517369781
1348	TCGA-E9-A1NA-01	BRCA	2.598042904	5.219613988
1349	TCGA-E9-A1NC-01	BRCA	1.913412982	4.802362565
1350	TCGA-E9-A1ND-01	BRCA	2.327829631	4.334713506
1351	TCGA-E9-A1NE-01	BRCA	1.349955454	5.021537194
1352	TCGA-E9-A1NF-01	BRCA	1.310187846	3.10785238
1353	TCGA-E9-A1NG-01	BRCA	0.390843683	3.700305477
1354	TCGA-E9-A1NH-01	BRCA	0.635042034	2.687823721
1355	TCGA-E9-A1NI-01	BRCA	0.933351285	4.166171871
1356	TCGA-E9-A1QZ-01	BRCA	0.450422946	5.266913184
1357	TCGA-E9-A1R0-01	BRCA	0.656904669	4.638296492
1358	TCGA-E9-A1R2-01	BRCA	1.611903512	4.396803712
1359	TCGA-E9-A1R3-01	BRCA	0.598802144	0.359331097
1360	TCGA-E9-A1R4-01	BRCA	3.006465791	4.882472218
1361	TCGA-E9-A1R5-01	BRCA	1.088871297	3.102701628
1362	TCGA-E9-A1R6-01	BRCA	0.703694567	5.593340963
1363	TCGA-E9-A1R7-01	BRCA	1.185965361	5.057499138
1364	TCGA-E9-A1RA-01	BRCA	0.389378673	3.847301741
1365	TCGA-E9-A1RB-01	BRCA	0.684200014	6.534792855
1366	TCGA-E9-A1RC-01	BRCA	1.070510908	5.710071649
1367	TCGA-E9-A1RD-01	BRCA	0.483176299	4.269956515
1368	TCGA-E9-A1RE-01	BRCA	1.24737757	5.062441672
1369	TCGA-E9-A1RF-01	BRCA	3.730192477	3.466167652
1370	TCGA-E9-A1RG-01	BRCA	0.995680897	4.656648066
1371	TCGA-E9-A1RH-01	BRCA	2.118330028	2.936824357
1372	TCGA-E9-A1RI-01	BRCA	0.343159957	3.474875745
1373	TCGA-E9-A226-01	BRCA	1.426408911	4.567740596
1374	TCGA-E9-A227-01	BRCA	0.43486923	3.976285635
1375	TCGA-E9-A228-01	BRCA	1.063565761	5.533194075
1376	TCGA-E9-A229-01	BRCA	0.43878187	3.885016064
1377	TCGA-E9-A22A-01	BRCA	0.740760895	4.829255639
1378	TCGA-E9-A22B-01	BRCA	1.49189448	3.650724875
1379	TCGA-E9-A22D-01	BRCA	0.726532077	4.403427575
1380	TCGA-E9-A22E-01	BRCA	3.094443311	3.508135466
1381	TCGA-E9-A22G-01	BRCA	2.409206207	6.961069628
1382	TCGA-E9-A22H-01	BRCA	0.680166654	5.522677202
1383	TCGA-E9-A243-01	BRCA	1.705752032	4.535202952
1384	TCGA-E9-A244-01	BRCA	2.064046574	4.221869824
1385	TCGA-E9-A245-01	BRCA	0.480725935	4.854807535
1386	TCGA-E9-A247-01	BRCA	0.932490573	5.907387992
1387	TCGA-E9-A248-01	BRCA	0.802052422	4.689648324
1388	TCGA-E9-A249-01	BRCA	0.437664356	4.830728191
1389	TCGA-E9-A24A-01	BRCA	0.611271195	4.255955837
1390	TCGA-E9-A295-01	BRCA	2.186844202	5.072624088
1391	TCGA-E9-A2JS-01	BRCA	1.423334435	5.50302873
1392	TCGA-E9-A2JT-01	BRCA	0.372094014	3.117455553
1393	TCGA-E9-A3HO-01	BRCA	1.2227941	4.518217116
1394	TCGA-E9-A3Q9-01	BRCA	0	1.422368033
1395	TCGA-E9-A3QA-01	BRCA	0.869454768	4.970588375
1396	TCGA-E9-A3X8-01	BRCA	0.520961946	3.668496092
1397	TCGA-E9-A54X-01	BRCA	0	5.762669795
1398	TCGA-E9-A54Y-01	BRCA	0.746936545	4.067740455
1399	TCGA-E9-A5FK-01	BRCA	0.421606321	2.655692284
1400	TCGA-E9-A5FL-01	BRCA	1.606902803	2.391442193
1401	TCGA-E9-A5UO-01	BRCA	0.527527955	5.508209165
1402	TCGA-E9-A5UP-01	BRCA	0	2.162886556
1403	TCGA-E9-A6HE-01	BRCA	0.378085985	4.972017309
1404	TCGA-EW-A1IW-01	BRCA	2.057199734	5.810356153
1405	TCGA-EW-A1IX-01	BRCA	0.713216753	1.789863446
1406	TCGA-EW-A1IY-01	BRCA	0.632817776	5.480180023
1407	TCGA-EW-A1IZ-01	BRCA	10.04407278	5.420065328
1408	TCGA-EW-A1J1-01	BRCA	0.377298784	4.233148507
1409	TCGA-EW-A1J2-01	BRCA	0.896038178	2.264064178
1410	TCGA-EW-A1J3-01	BRCA	0.601848673	5.028622863
1411	TCGA-EW-A1J5-01	BRCA	10.56776194	5.027736979
1412	TCGA-EW-A1J6-01	BRCA	0.75422454	3.389158991
1413	TCGA-EW-A1OV-01	BRCA	2.721495895	3.167597692
1414	TCGA-EW-A1OX-01	BRCA	0.323514402	4.375108624
1415	TCGA-EW-A1OY-01	BRCA	1.591698549	4.352907336
1416	TCGA-EW-A1OZ-01	BRCA	1.503399073	3.293514199
1417	TCGA-EW-A1P0-01	BRCA	0.529290879	4.612786354
1418	TCGA-EW-A1P1-01	BRCA	0.028660581	3.335286039
1419	TCGA-EW-A1P3-01	BRCA	0.526442576	4.580958604
1420	TCGA-EW-A1P4-01	BRCA	1.564014602	4.885075717
1421	TCGA-EW-A1P5-01	BRCA	0.36221559	4.855288437
1422	TCGA-EW-A1P6-01	BRCA	0.617651271	3.681940466
1423	TCGA-EW-A1P7-01	BRCA	0.418229463	2.97689483
1424	TCGA-EW-A1P8-01	BRCA	0.791036114	5.597389556
1425	TCGA-EW-A1PA-01	BRCA	0.902652709	4.093282135
1426	TCGA-EW-A1PB-01	BRCA	3.567408553	5.453788833
1427	TCGA-EW-A1PC-01	BRCA	0	7.307122361
1428	TCGA-EW-A1PD-01	BRCA	2.059101732	4.975130695
1429	TCGA-EW-A1PE-01	BRCA	0.775477419	3.721770227
1430	TCGA-EW-A1PG-01	BRCA	0.268401463	2.051160964
1431	TCGA-EW-A1PH-01	BRCA	1.214390914	4.20671203
1432	TCGA-EW-A2FR-01	BRCA	0.791176564	3.171542399
1433	TCGA-EW-A2FS-01	BRCA	0.700080601	4.34047302
1434	TCGA-EW-A2FV-01	BRCA	104.9388794	5.16377013
1435	TCGA-EW-A2FW-01	BRCA	0.634256908	6.91960446
1436	TCGA-EW-A3E8-01	BRCA	0	3.951770827
1437	TCGA-EW-A3U0-01	BRCA	0	4.069683494
1438	TCGA-EW-A423-01	BRCA	0.841289868	3.359495783
1439	TCGA-EW-A6S9-01	BRCA	0.318036573	4.955742237
1440	TCGA-EW-A6SA-01	BRCA	1.338929606	5.38113524
1441	TCGA-EW-A6SB-01	BRCA	1.235449842	3.611673379
1442	TCGA-EW-A6SC-01	BRCA	0.504031267	5.836321258
1443	TCGA-EW-A6SD-01	BRCA	0.874334542	3.580762629
1444	TCGA-GI-A2C8-01	BRCA	3.190229628	0.957994665
1445	TCGA-GI-A2C9-01	BRCA	0	4.721856219
1446	TCGA-GM-A2D9-01	BRCA	11.76060835	2.445842732
1447	TCGA-GM-A2DA-01	BRCA	0.843053901	3.378840221
1448	TCGA-GM-A2DB-01	BRCA	3.158911539	3.953960618
1449	TCGA-GM-A2DC-01	BRCA	0.369668895	1.516142804
1450	TCGA-GM-A2DD-01	BRCA	1.342597881	2.089183412
1451	TCGA-GM-A2DF-01	BRCA	0.915871309	4.296050591
1452	TCGA-GM-A2DH-01	BRCA	4.395549693	4.881599576
1453	TCGA-GM-A2DI-01	BRCA	1.595753437	3.198389365
1454	TCGA-GM-A2DK-01	BRCA	0.522484689	3.671146055
1455	TCGA-GM-A2DL-01	BRCA	1.146533706	4.902289176
1456	TCGA-GM-A2DM-01	BRCA	0.668462156	2.948542459
1457	TCGA-GM-A2DN-01	BRCA	0.461802244	4.223364234
1458	TCGA-GM-A2DO-01	BRCA	3.527145128	4.217402883
1459	TCGA-GM-A3NW-01	BRCA	1.06777311	3.10482738
1460	TCGA-GM-A3NY-01	BRCA	0	3.022109691
1461	TCGA-GM-A3XG-01	BRCA	0	2.013272781
1462	TCGA-GM-A3XL-01	BRCA	1.843218377	6.062357727
1463	TCGA-GM-A3XN-01	BRCA	0	3.239857028
1464	TCGA-GM-A4E0-01	BRCA	0.325266528	1.283848117
1465	TCGA-GM-A5PV-01	BRCA	0.504497607	2.39075306
1466	TCGA-GM-A5PX-01	BRCA	0.515733869	1.443192976
1467	TCGA-HN-A2NL-01	BRCA	1.836473765	6.312859816
1468	TCGA-HN-A2OB-01	BRCA	0.313739087	1.432435097
1469	TCGA-JL-A3YW-01	BRCA	0	2.437916665
1470	TCGA-JL-A3YX-01	BRCA	0.502012075	4.533031317
1471	TCGA-LD-A66U-01	BRCA	0.553116746	2.981702567
1472	TCGA-LD-A74U-01	BRCA	3.841404928	4.018549939
1473	TCGA-LD-A7W6-01	BRCA	0.546482831	4.258605814
1474	TCGA-LD-A9QF-01	BRCA	0.31642338	3.363338015
1475	TCGA-LL-A440-01	BRCA	0.045303438	2.231205347
1476	TCGA-LL-A441-01	BRCA	0	3.537236085
1477	TCGA-LL-A50Y-01	BRCA	0.51210212	3.286733174
1478	TCGA-LL-A5YL-01	BRCA	1.129778593	4.395591127
1479	TCGA-LL-A5YM-01	BRCA	0.439304484	4.375927556
1480	TCGA-LL-A5YN-01	BRCA	0.554761088	3.13835494
1481	TCGA-LL-A5YO-01	BRCA	0.681407644	3.4837416
1482	TCGA-LL-A5YP-01	BRCA	1.399506371	4.593063244
1483	TCGA-LL-A6FP-01	BRCA	1.116880976	2.697652247
1484	TCGA-LL-A6FQ-01	BRCA	0.877697801	3.596925001
1485	TCGA-LL-A6FR-01	BRCA	0.701287163	4.024124921
1486	TCGA-LL-A73Y-01	BRCA	2.05915577	4.152719133
1487	TCGA-LL-A73Z-01	BRCA	0.713629855	4.023033995
1488	TCGA-LL-A740-01	BRCA	0.850337244	3.930044627
1489	TCGA-LL-A7SZ-01	BRCA	1.176496181	4.52353589
1490	TCGA-LL-A7T0-01	BRCA	0.858588739	4.078605614
1491	TCGA-LL-A8F5-01	BRCA	2.701537532	4.85563123
1492	TCGA-LL-A9Q3-01	BRCA	1.050769028	2.392322642
1493	TCGA-LQ-A4E4-01	BRCA	0	5.040830295
1494	TCGA-MS-A51U-01	BRCA	0	2.988560093
1495	TCGA-OK-A5Q2-01	BRCA	0.531405189	5.129920746
1496	TCGA-OL-A5D6-01	BRCA	0.644628952	2.767022556
1497	TCGA-OL-A5D7-01	BRCA	1.16322044	5.642438156
1498	TCGA-OL-A5D8-01	BRCA	0.49654226	5.088313552
1499	TCGA-OL-A5DA-01	BRCA	1.151167372	4.446470125
1500	TCGA-OL-A5RU-01	BRCA	0.715956594	2.650877267
1501	TCGA-OL-A5RV-01	BRCA	0.158988878	2.98792553
1502	TCGA-OL-A5RW-01	BRCA	3.160378802	4.37882309
1503	TCGA-OL-A5RX-01	BRCA	0.473628255	2.486955755
1504	TCGA-OL-A5RY-01	BRCA	0.139464765	4.410855275
1505	TCGA-OL-A5RZ-01	BRCA	1.900141158	4.183311594
1506	TCGA-OL-A5S0-01	BRCA	0.637596224	4.333043377
1507	TCGA-OL-A66H-01	BRCA	0.362773663	4.21059446
1508	TCGA-OL-A66I-01	BRCA	0.849631217	6.829034964
1509	TCGA-OL-A66J-01	BRCA	1.023037416	2.978669824
1510	TCGA-OL-A66K-01	BRCA	0.605411124	4.00909599
1511	TCGA-OL-A66L-01	BRCA	1.211372652	2.383024786
1512	TCGA-OL-A66N-01	BRCA	0.693889378	2.499248713
1513	TCGA-OL-A66O-01	BRCA	0.570979042	5.821937412
1514	TCGA-OL-A66P-01	BRCA	1.737809825	2.40510511
1515	TCGA-OL-A6VO-01	BRCA	0.347781111	6.101217569
1516	TCGA-OL-A6VQ-01	BRCA	0.807900251	3.286548329
1517	TCGA-OL-A6VR-01	BRCA	0.184997139	2.76485933
1518	TCGA-OL-A97C-01	BRCA	1.206932405	3.573939963
1519	TCGA-PE-A5DC-01	BRCA	1.963090699	4.490721942
1520	TCGA-PE-A5DD-01	BRCA	1.027753859	3.791503252
1521	TCGA-PE-A5DE-01	BRCA	7.777406069	3.62509564
1522	TCGA-PL-A8LV-01	BRCA	2.160574805	5.610232598
1523	TCGA-PL-A8LX-01	BRCA	0.642630924	2.428980954
1524	TCGA-PL-A8LY-01	BRCA	0.021965099	3.641069073
1525	TCGA-PL-A8LZ-01	BRCA	1.709161587	4.846346047
1526	TCGA-S3-A6ZF-01	BRCA	0.577869697	5.027764904
1527	TCGA-S3-A6ZG-01	BRCA	0.791639186	5.663706843
1528	TCGA-S3-A6ZH-01	BRCA	0.620838974	4.755158601
1529	TCGA-S3-AA0Z-01	BRCA	1.070578831	6.15141673
1530	TCGA-S3-AA10-01	BRCA	1.890704255	6.609922372
1531	TCGA-S3-AA11-01	BRCA	1.073791147	4.579380902
1532	TCGA-S3-AA12-01	BRCA	0.626706979	4.155531238
1533	TCGA-S3-AA14-01	BRCA	0.292784491	3.463721342
1534	TCGA-S3-AA15-01	BRCA	0.454021787	4.034581813
1535	TCGA-S3-AA17-01	BRCA	1.722875219	3.646759808
1536	TCGA-UL-AAZ6-01	BRCA	1.519363619	3.837079489
1537	TCGA-UU-A93S-01	BRCA	2.425376499	3.868812621
1538	TCGA-V7-A7HQ-01	BRCA	0.466576498	3.760484952
1539	TCGA-W8-A86G-01	BRCA	0.277292031	3.11002545
1540	TCGA-WT-AB41-01	BRCA	0.789752488	2.830960341
1541	TCGA-WT-AB44-01	BRCA	0.564524054	0.465803115
1542	TCGA-XX-A899-01	BRCA	0.698862381	3.333264592
1543	TCGA-XX-A89A-01	BRCA	2.980709991	2.706730966
1544	TCGA-Z7-A8R5-01	BRCA	0.345315195	2.298711134
1545	TCGA-Z7-A8R6-01	BRCA	1.324529233	5.042052388
1546	TCGA-HM-A6W2-06	CESC	0	6.779490133
1547	TCGA-BI-A0VR-01	CESC	2.765326909	5.213798077
1548	TCGA-BI-A0VS-01	CESC	2.968805589	4.632712613
1549	TCGA-BI-A20A-01	CESC	1.421775578	5.88306859
1550	TCGA-C5-A0TN-01	CESC	0.571099052	5.575090302
1551	TCGA-C5-A1BE-01	CESC	1.789291244	4.777764495
1552	TCGA-C5-A1BF-01	CESC	1.758775189	5.231558289
1553	TCGA-C5-A1BJ-01	CESC	3.77400759	5.440701748
1554	TCGA-C5-A1BK-01	CESC	4.219401617	4.719090703
1555	TCGA-C5-A1BL-01	CESC	5.749886145	6.021306976
1556	TCGA-C5-A1BM-01	CESC	3.420589424	3.804773314
1557	TCGA-C5-A1BN-01	CESC	1.746532803	6.889101113
1558	TCGA-C5-A1BQ-01	CESC	0	5.568353256
1559	TCGA-C5-A1M5-01	CESC	1.489144553	5.794296615
1560	TCGA-C5-A1M6-01	CESC	3.521380372	4.373384168
1561	TCGA-C5-A1M7-01	CESC	2.83320606	3.771602014
1562	TCGA-C5-A1M8-01	CESC	1.692855387	5.407106589
1563	TCGA-C5-A1M9-01	CESC	1.143050013	5.513955306
1564	TCGA-C5-A1ME-01	CESC	1.610982548	4.495496287
1565	TCGA-C5-A1MF-01	CESC	2.411720116	4.430099678
1566	TCGA-C5-A1MI-01	CESC	1.149504355	6.096628206
1567	TCGA-C5-A1MJ-01	CESC	2.303906765	5.498451951
1568	TCGA-C5-A1MK-01	CESC	7.903950948	3.812303902
1569	TCGA-C5-A1ML-01	CESC	1.898646513	5.03067072
1570	TCGA-C5-A1MN-01	CESC	3.839506671	4.58448028
1571	TCGA-C5-A1MP-01	CESC	1.242462232	5.290041191
1572	TCGA-C5-A1MQ-01	CESC	1.088509686	3.691220333
1573	TCGA-C5-A2LS-01	CESC	0.978000693	5.398994528
1574	TCGA-C5-A2LT-01	CESC	0.619676562	4.420823311
1575	TCGA-C5-A2LV-01	CESC	1.242569921	5.566166432
1576	TCGA-C5-A2LX-01	CESC	3.787573269	5.310006457
1577	TCGA-C5-A2LY-01	CESC	1.685612256	4.341356876
1578	TCGA-C5-A2LZ-01	CESC	0	5.224369373
1579	TCGA-C5-A2M1-01	CESC	1.744504375	6.095883552
1580	TCGA-C5-A2M2-01	CESC	1.106649815	4.956403887
1581	TCGA-C5-A3HD-01	CESC	0	6.159101067
1582	TCGA-C5-A3HF-01	CESC	0.608455479	4.265019472
1583	TCGA-C5-A3HL-01	CESC	0	5.428910971
1584	TCGA-C5-A7X5-01	CESC	4.04492177	3.930544781
1585	TCGA-DG-A2KH-01	CESC	1.298203993	5.226334416
1586	TCGA-DG-A2KJ-01	CESC	1.678388928	3.389915817
1587	TCGA-DG-A2KK-01	CESC	6.109416973	5.732369015
1588	TCGA-DG-A2KL-01	CESC	3.246903708	5.125117487
1589	TCGA-DG-A2KM-01	CESC	3.272192824	3.931814134
1590	TCGA-DR-A0ZL-01	CESC	1.55163853	5.497214187
1591	TCGA-DR-A0ZM-01	CESC	31.16264191	3.478823389
1592	TCGA-DS-A0VK-01	CESC	2.983767961	4.494858764
1593	TCGA-DS-A0VL-01	CESC	1.650884979	5.437355995
1594	TCGA-DS-A0VM-01	CESC	7.125530499	6.050268244
1595	TCGA-DS-A0VN-01	CESC	3.25253545	5.215278027
1596	TCGA-DS-A1OA-01	CESC	1.271306882	4.815674762
1597	TCGA-DS-A1OB-01	CESC	15.22768927	5.238416721
1598	TCGA-DS-A1OC-01	CESC	7.788757389	4.952232141
1599	TCGA-DS-A1OD-01	CESC	3.07291233	5.510828057
1600	TCGA-DS-A3LQ-01	CESC	0.759043241	5.656036842
1601	TCGA-DS-A5RQ-01	CESC	1.888103118	5.083647671
1602	TCGA-EA-A1QS-01	CESC	1.116129702	3.435371349
1603	TCGA-EA-A1QT-01	CESC	1.886415227	5.569545139
1604	TCGA-EA-A3HQ-01	CESC	1.748382953	5.340539012
1605	TCGA-EA-A3HR-01	CESC	1.302887906	4.453954879
1606	TCGA-EA-A3HS-01	CESC	15.33815807	5.666644644
1607	TCGA-EA-A3HT-01	CESC	1.943974651	4.717508142
1608	TCGA-EA-A3HU-01	CESC	21.03316684	5.494642916
1609	TCGA-EA-A3QD-01	CESC	1.896780713	4.558177547
1610	TCGA-EA-A3QE-01	CESC	1.142624647	4.89147346
1611	TCGA-EA-A3Y4-01	CESC	2.457449266	4.298662234
1612	TCGA-EA-A410-01	CESC	31.92157637	6.363238075
1613	TCGA-EA-A411-01	CESC	1.059919586	4.959992933
1614	TCGA-EA-A439-01	CESC	2.046025075	6.480821619
1615	TCGA-EA-A43B-01	CESC	3.263228005	5.235718545
1616	TCGA-EA-A44S-01	CESC	0	5.224564612
1617	TCGA-EA-A4BA-01	CESC	0	5.914853259
1618	TCGA-EA-A50E-01	CESC	0	5.50150534
1619	TCGA-EA-A556-01	CESC	0	5.012292718
1620	TCGA-EA-A5FO-01	CESC	1.374097559	6.546545862
1621	TCGA-EA-A5O9-01	CESC	1.084824299	5.196380463
1622	TCGA-EA-A5ZD-01	CESC	0.412296307	4.458892711
1623	TCGA-EA-A5ZE-01	CESC	0.870828103	5.469670868
1624	TCGA-EA-A5ZF-01	CESC	1.293620419	5.782221973
1625	TCGA-EK-A2GZ-01	CESC	1.244367822	3.910527106
1626	TCGA-EK-A2H0-01	CESC	3.273991512	4.76422327
1627	TCGA-EK-A2H1-01	CESC	0.554771749	4.910397978
1628	TCGA-EK-A2IP-01	CESC	2.268812282	4.314009497
1629	TCGA-EK-A2PG-01	CESC	11.55964998	4.581734269
1630	TCGA-EK-A2PI-01	CESC	1.620134851	4.917532223
1631	TCGA-EK-A2PK-01	CESC	0.485337346	3.992671858
1632	TCGA-EK-A2PL-01	CESC	3.561211096	4.411647427
1633	TCGA-EK-A2PM-01	CESC	5.828647397	5.286114882
1634	TCGA-EK-A2R7-01	CESC	2.407667346	5.903905651
1635	TCGA-EK-A2R8-01	CESC	5.570848844	6.468745132
1636	TCGA-EK-A2R9-01	CESC	0.953817193	5.762301919
1637	TCGA-EK-A2RA-01	CESC	4.181181788	4.685888934
1638	TCGA-EK-A2RB-01	CESC	2.057199978	5.148623091
1639	TCGA-EK-A2RC-01	CESC	3.332678662	4.924561151
1640	TCGA-EK-A2RE-01	CESC	0.344512567	5.12867927
1641	TCGA-EK-A2RJ-01	CESC	7.285376164	5.322802919
1642	TCGA-EK-A2RK-01	CESC	4.48663773	5.098212649
1643	TCGA-EK-A2RL-01	CESC	0.455165752	6.327584202
1644	TCGA-EK-A2RN-01	CESC	2.871136454	3.001730967
1645	TCGA-EK-A2RO-01	CESC	2.476900371	4.413575018
1646	TCGA-EK-A3GJ-01	CESC	4.704030066	5.897558002
1647	TCGA-EK-A3GK-01	CESC	25.49647326	5.639157102
1648	TCGA-EK-A3GM-01	CESC	3.460306686	4.023138927
1649	TCGA-EK-A3GN-01	CESC	0.979089858	5.18025856
1650	TCGA-EX-A1H5-01	CESC	1.092320089	6.255378835
1651	TCGA-EX-A1H6-01	CESC	1.727574598	3.787726357
1652	TCGA-EX-A3L1-01	CESC	0.798236891	4.258389477
1653	TCGA-FU-A23K-01	CESC	2.666038849	4.942116818
1654	TCGA-FU-A23L-01	CESC	4.292876106	4.731889941
1655	TCGA-FU-A2QG-01	CESC	1.570210822	5.014055997
1656	TCGA-FU-A3EO-01	CESC	1.033053914	5.009077521
1657	TCGA-FU-A3HY-01	CESC	3.444719012	6.235666155
1658	TCGA-FU-A3HZ-01	CESC	44.33334299	6.556928698
1659	TCGA-FU-A3NI-01	CESC	1.878864443	5.18392422
1660	TCGA-FU-A3TQ-01	CESC	1.095057298	4.446394381
1661	TCGA-FU-A3TX-01	CESC	1.235199734	5.177192293
1662	TCGA-FU-A3WB-01	CESC	1.35235771	5.962260307
1663	TCGA-FU-A3YQ-01	CESC	1.313667362	4.668727107
1664	TCGA-FU-A40J-01	CESC	3.911546741	5.057292797
1665	TCGA-FU-A57G-01	CESC	0	4.05239237
1666	TCGA-FU-A5XV-01	CESC	1.744895369	5.079078383
1667	TCGA-HG-A2PA-01	CESC	1.245787054	5.362036305
1668	TCGA-HM-A3JJ-01	CESC	1.192576744	4.497318893
1669	TCGA-HM-A3JK-01	CESC	1.015822638	3.785707687
1670	TCGA-HM-A4S6-01	CESC	0	5.124023167
1671	TCGA-HM-A6W2-01	CESC	0.76553882	5.644313263
1672	TCGA-IR-A3L7-01	CESC	0.534466171	5.81245918
1673	TCGA-IR-A3LA-01	CESC	21.48532614	5.793614302
1674	TCGA-IR-A3LB-01	CESC	0.929137694	3.706258783
1675	TCGA-IR-A3LC-01	CESC	0.717110498	5.742317004
1676	TCGA-IR-A3LF-01	CESC	2.071777927	5.665767826
1677	TCGA-IR-A3LH-01	CESC	16.43425622	4.234963804
1678	TCGA-IR-A3LI-01	CESC	6.564548788	4.430713593
1679	TCGA-IR-A3LK-01	CESC	25.48998932	5.588319258
1680	TCGA-IR-A3LL-01	CESC	8.148459187	4.61026806
1681	TCGA-JW-A5VG-01	CESC	0.597339615	6.354545694
1682	TCGA-JW-A5VH-01	CESC	1.436485534	6.993121488
1683	TCGA-JW-A5VI-01	CESC	1.40386251	5.494312359
1684	TCGA-JW-A5VJ-01	CESC	4.036483827	4.669052974
1685	TCGA-JW-A5VK-01	CESC	0.83622657	5.218158654
1686	TCGA-JW-A5VL-01	CESC	40.84498915	4.263030635
1687	TCGA-JX-A3PZ-01	CESC	0.993091432	5.064080955
1688	TCGA-JX-A3Q0-01	CESC	14.88312291	4.923857554
1689	TCGA-JX-A3Q8-01	CESC	1.119779715	6.507609791
1690	TCGA-JX-A5QV-01	CESC	0.924924353	5.464026818
1691	TCGA-LP-A4AU-01	CESC	0.817021314	5.197130329
1692	TCGA-LP-A4AV-01	CESC	8.678988879	4.362268591
1693	TCGA-LP-A4AW-01	CESC	1.857922006	5.350326839
1694	TCGA-LP-A4AX-01	CESC	0.740461948	6.197558388
1695	TCGA-LP-A5U2-01	CESC	4.266361014	5.632031536
1696	TCGA-LP-A5U3-01	CESC	0.845305362	6.090874993
1697	TCGA-MA-AA3Y-01	CESC	3.142649353	4.403091494
1698	TCGA-MU-A51Y-01	CESC	0	4.914662187
1699	TCGA-MY-A5BD-01	CESC	0	6.530589262
1700	TCGA-MY-A5BE-01	CESC	0	5.637522907
1701	TCGA-MY-A5BF-01	CESC	0	7.172579367
1702	TCGA-Q1-A5R1-01	CESC	1.126976983	5.410889042
1703	TCGA-Q1-A5R2-01	CESC	6.956502133	5.261748636
1704	TCGA-Q1-A5R3-01	CESC	1.261678496	4.321571992
1705	TCGA-VS-A8EJ-01	CESC	2.746369855	3.910493711
1706	TCGA-VS-A8EK-01	CESC	4.419245636	5.017889403
1707	TCGA-VS-A9UI-01	CESC	2.458413722	3.5911166
1708	TCGA-VS-A9UJ-01	CESC	7.433775525	5.995624731
1709	TCGA-ZJ-AAX8-01	CESC	1.118057028	4.05154052
1710	TCGA-3X-AAV9-01	CHOL	0.629106042	2.035681269
1711	TCGA-3X-AAVA-01	CHOL	0.550709828	2.641162331
1712	TCGA-3X-AAVB-01	CHOL	0.545693686	3.037340785
1713	TCGA-3X-AAVC-01	CHOL	0.924284159	3.585297129
1714	TCGA-3X-AAVE-01	CHOL	0.701996187	3.95634571
1715	TCGA-4G-AAZO-01	CHOL	0.699647368	1.687295387
1716	TCGA-4G-AAZT-01	CHOL	0.860303539	0.725726279
1717	TCGA-W5-AA2G-01	CHOL	0.678445113	2.786194743
1718	TCGA-W5-AA2H-01	CHOL	0.047412682	2.412209984
1719	TCGA-W5-AA2I-01	CHOL	0.959692415	3.527845063
1720	TCGA-W5-AA2O-01	CHOL	0.513328072	3.581448778
1721	TCGA-W5-AA2Q-01	CHOL	0.840875262	2.891791513
1722	TCGA-W5-AA2R-01	CHOL	0.401548209	1.828961643
1723	TCGA-W5-AA2T-01	CHOL	0.688638231	5.175794722
1724	TCGA-W5-AA2U-01	CHOL	1.309541814	3.901172124
1725	TCGA-W5-AA2W-01	CHOL	0.536132386	4.208634889
1726	TCGA-W5-AA2X-01	CHOL	1.116441878	4.308652448
1727	TCGA-W5-AA2Z-01	CHOL	0.531219173	3.023644582
1728	TCGA-W5-AA30-01	CHOL	1.055375452	3.947479215
1729	TCGA-W5-AA31-01	CHOL	0.90646431	2.593308456
1730	TCGA-W5-AA33-01	CHOL	0.574152408	2.253089588
1731	TCGA-W5-AA34-01	CHOL	0.641453802	3.087664158
1732	TCGA-W5-AA36-01	CHOL	0.884216558	3.605415981
1733	TCGA-W5-AA38-01	CHOL	0.601545189	3.420017731
1734	TCGA-W5-AA39-01	CHOL	14.94891427	3.710622606
1735	TCGA-W6-AA0S-01	CHOL	0.765881191	2.839635408
1736	TCGA-WD-A7RX-01	CHOL	0.532967812	2.309300406
1737	TCGA-YR-A95A-01	CHOL	0.519122931	3.461674976
1738	TCGA-ZD-A8I3-01	CHOL	0.730540068	3.315446925
1739	TCGA-ZH-A8Y1-01	CHOL	0.727698313	2.849283351
1740	TCGA-ZH-A8Y2-01	CHOL	1.000937127	2.570004515
1741	TCGA-ZH-A8Y4-01	CHOL	1.032006284	3.574409295
1742	TCGA-ZH-A8Y5-01	CHOL	0.448741258	3.19296079
1743	TCGA-ZH-A8Y6-01	CHOL	0.677536475	2.546421776
1744	TCGA-ZH-A8Y8-01	CHOL	0.603776263	1.726657461
1745	TCGA-ZU-A8S4-01	CHOL	0.760848361	6.170109234
1746	TCGA-NH-A8F7-06	COAD	0	3.284466471
1747	TCGA-3L-AA1B-01	COAD	2.697224651	4.836124428
1748	TCGA-4N-A93T-01	COAD	2.099683694	2.705020687
1749	TCGA-4T-AA8H-01	COAD	2.83327291	5.463603965
1750	TCGA-5M-AAT4-01	COAD	3.887086006	5.275682505
1751	TCGA-5M-AAT6-01	COAD	43.25282164	5.16467782
1752	TCGA-5M-AATE-01	COAD	2.55267081	5.3915825
1753	TCGA-A6-2671-01	COAD	1.550327587	2.720021542
1754	TCGA-A6-2674-01	COAD	2.423917548	4.632246747
1755	TCGA-A6-2675-01	COAD	2.124851296	2.547692542
1756	TCGA-A6-2677-01	COAD	2.885741762	5.917356522
1757	TCGA-A6-2678-01	COAD	4.250582372	5.344822017
1758	TCGA-A6-2683-01	COAD	5.617341276	1.617875299
1759	TCGA-A6-2684-01	COAD	2.315757764	4.948497923
1760	TCGA-A6-2685-01	COAD	1.084466705	3.608939431
1761	TCGA-A6-2686-01	COAD	53.79114409	5.4325632
1762	TCGA-A6-3809-01	COAD	27.84254496	4.031529124
1763	TCGA-A6-4105-01	COAD	3.618571399	5.835427254
1764	TCGA-A6-4107-01	COAD	4.149346172	5.429909275
1765	TCGA-A6-5656-01	COAD	2.413607539	3.654183273
1766	TCGA-A6-5657-01	COAD	2.462581203	4.385591862
1767	TCGA-A6-5659-01	COAD	4.549142217	3.83380028
1768	TCGA-A6-5660-01	COAD	2.791346753	4.22667524
1769	TCGA-A6-5661-01	COAD	29.02333212	6.49910182
1770	TCGA-A6-5662-01	COAD	1.456847072	3.634288342
1771	TCGA-A6-5664-01	COAD	1.438675617	5.339264969
1772	TCGA-A6-5665-01	COAD	42.14237419	6.678378477
1773	TCGA-A6-5666-01	COAD	2.082153182	6.54718817
1774	TCGA-A6-5667-01	COAD	1.475822094	5.009481183
1775	TCGA-A6-6137-01	COAD	2.693161839	4.076193929
1776	TCGA-A6-6138-01	COAD	2.288918306	5.066428447
1777	TCGA-A6-6141-01	COAD	0	4.949190519
1778	TCGA-A6-6142-01	COAD	2.009744245	3.599627668
1779	TCGA-A6-6648-01	COAD	2.111803134	4.975150062
1780	TCGA-A6-6649-01	COAD	2.786236233	5.366894055
1781	TCGA-A6-6650-01	COAD	0	5.481389148
1782	TCGA-A6-6651-01	COAD	2.011516172	5.243225864
1783	TCGA-A6-6652-01	COAD	1.902565197	3.840147021
1784	TCGA-A6-6653-01	COAD	27.14104518	6.039218746
1785	TCGA-A6-6654-01	COAD	4.220730417	4.356871029
1786	TCGA-A6-6780-01	COAD	27.59535143	6.713087926
1787	TCGA-A6-6781-01	COAD	45.66164436	3.349507036
1788	TCGA-A6-6782-01	COAD	3.354598575	4.131432431
1789	TCGA-A6-A565-01	COAD	8.987569599	4.463369487
1790	TCGA-A6-A566-01	COAD	3.853309185	5.472923022
1791	TCGA-A6-A567-01	COAD	1.252983046	4.232753121
1792	TCGA-A6-A56B-01	COAD	2.207521841	3.717112919
1793	TCGA-AA-3489-01	COAD	2.809246143	4.920591298
1794	TCGA-AA-3492-01	COAD	50.83334141	5.851515641
1795	TCGA-AA-3496-01	COAD	3.112406293	3.93318387
1796	TCGA-AA-3502-01	COAD	4.156743632	5.207187695
1797	TCGA-AA-3506-01	COAD	3.412823859	4.206104046
1798	TCGA-AA-3510-01	COAD	79.28818528	5.483716898
1799	TCGA-AA-3511-01	COAD	3.115644383	4.699240139
1800	TCGA-AA-3514-01	COAD	4.442083794	3.72669235
1801	TCGA-AA-3517-01	COAD	1.57070571	4.397228159
1802	TCGA-AA-3519-01	COAD	3.076974623	5.335882431
1803	TCGA-AA-3520-01	COAD	3.391184683	5.010463485
1804	TCGA-AA-3521-01	COAD	2.75126012	4.556025034
1805	TCGA-AA-3522-01	COAD	2.868006614	5.629273506
1806	TCGA-AA-3524-01	COAD	2.589202204	6.581064146
1807	TCGA-AA-3526-01	COAD	3.800031127	6.674204205
1808	TCGA-AA-3527-01	COAD	3.355357429	2.882372386
1809	TCGA-AA-3529-01	COAD	1.292060402	4.440942508
1810	TCGA-AA-3531-01	COAD	2.878555439	4.245632206
1811	TCGA-AA-3532-01	COAD	2.833020363	4.983014489
1812	TCGA-AA-3534-01	COAD	3.264687831	6.280875931
1813	TCGA-AA-3538-01	COAD	2.283822578	4.509543659
1814	TCGA-AA-3544-01	COAD	3.182168601	4.158679572
1815	TCGA-AA-3548-01	COAD	2.822962241	3.61177944
1816	TCGA-AA-3549-01	COAD	2.822202098	3.860386539
1817	TCGA-AA-3560-01	COAD	3.04824205	3.237389818
1818	TCGA-AA-3561-01	COAD	2.779069852	6.436582009
1819	TCGA-AA-3655-01	COAD	1.880296754	5.745425103
1820	TCGA-AA-3660-01	COAD	3.026001758	4.660417578
1821	TCGA-AA-3663-01	COAD	52.17963688	6.48993327
1822	TCGA-AA-3664-01	COAD	3.88627023	5.025908348
1823	TCGA-AA-3666-01	COAD	4.403177748	4.92923763
1824	TCGA-AA-3667-01	COAD	1.922337232	2.57278106
1825	TCGA-AA-3673-01	COAD	1.897531656	5.97263753
1826	TCGA-AA-3675-01	COAD	2.030890659	5.511925092
1827	TCGA-AA-3678-01	COAD	1.861671155	4.232572473
1828	TCGA-AA-3679-01	COAD	1.759637775	4.578583547
1829	TCGA-AA-3680-01	COAD	2.940240161	4.07838799
1830	TCGA-AA-3681-01	COAD	2.777564043	4.469604541
1831	TCGA-AA-3684-01	COAD	3.351507441	2.980481171
1832	TCGA-AA-3685-01	COAD	2.194129094	4.542842792
1833	TCGA-AA-3688-01	COAD	1.830381323	4.884712126
1834	TCGA-AA-3692-01	COAD	1.931897636	4.317788022
1835	TCGA-AA-3693-01	COAD	3.738650747	5.393022068
1836	TCGA-AA-3696-01	COAD	2.352727171	5.651928643
1837	TCGA-AA-3710-01	COAD	0	5.824331636
1838	TCGA-AA-3712-01	COAD	3.047221306	6.084301401
1839	TCGA-AA-3713-01	COAD	26.3572232	5.997897069
1840	TCGA-AA-3715-01	COAD	62.13049009	4.451478814
1841	TCGA-AA-3812-01	COAD	3.05462934	2.32248418
1842	TCGA-AA-3814-01	COAD	2.486459862	5.169812857
1843	TCGA-AA-3818-01	COAD	3.80594505	5.162115949
1844	TCGA-AA-3819-01	COAD	5.02210613	4.623622899
1845	TCGA-AA-3831-01	COAD	2.863978529	5.650845596
1846	TCGA-AA-3833-01	COAD	16.03356289	4.876410369
1847	TCGA-AA-3837-01	COAD	3.33344669	4.473961581
1848	TCGA-AA-3841-01	COAD	1.875712938	3.489762946
1849	TCGA-AA-3846-01	COAD	2.576957845	5.7618435
1850	TCGA-AA-3848-01	COAD	3.586851408	2.869176087
1851	TCGA-AA-3852-01	COAD	4.046704127	5.452817206
1852	TCGA-AA-3854-01	COAD	3.781288948	4.220703441
1853	TCGA-AA-3856-01	COAD	1.660813908	4.682580192
1854	TCGA-AA-3858-01	COAD	1.603518524	4.728423517
1855	TCGA-AA-3875-01	COAD	3.25119373	6.311596313
1856	TCGA-AA-3947-01	COAD	57.60675088	7.454769647
1857	TCGA-AA-3952-01	COAD	2.810895242	4.993439281
1858	TCGA-AA-3955-01	COAD	3.754886349	6.6916104
1859	TCGA-AA-3956-01	COAD	4.276765848	4.034903738
1860	TCGA-AA-3966-01	COAD	31.92374086	5.158205694
1861	TCGA-AA-3968-01	COAD	3.966434912	6.2027095
1862	TCGA-AA-3973-01	COAD	2.325439222	4.500301438
1863	TCGA-AA-3975-01	COAD	4.222213949	3.263207905
1864	TCGA-AA-3976-01	COAD	2.465807367	5.230943003
1865	TCGA-AA-3982-01	COAD	3.592945335	4.423343451
1866	TCGA-AA-3984-01	COAD	130.3744762	6.880116843
1867	TCGA-AA-3986-01	COAD	2.295170388	4.919526983
1868	TCGA-AA-3989-01	COAD	3.25615313	4.199016119
1869	TCGA-AA-3994-01	COAD	4.813596592	4.833262604
1870	TCGA-AA-A004-01	COAD	2.137375038	2.187184189
1871	TCGA-AA-A00O-01	COAD	0	3.588171083
1872	TCGA-AA-A00Z-01	COAD	2.48935888	5.481465586
1873	TCGA-AA-A017-01	COAD	1.704082139	3.224764487
1874	TCGA-AA-A01C-01	COAD	2.267200256	4.935973066
1875	TCGA-AA-A01D-01	COAD	0	5.627620862
1876	TCGA-AA-A01I-01	COAD	3.018582606	5.75528601
1877	TCGA-AA-A01K-01	COAD	0	4.320029536
1878	TCGA-AA-A01S-01	COAD	1.425825609	3.130317648
1879	TCGA-AA-A01T-01	COAD	2.525263179	1.139798637
1880	TCGA-AA-A01V-01	COAD	3.107886023	4.131981803
1881	TCGA-AA-A01X-01	COAD	1.798284293	2.937785024
1882	TCGA-AA-A01Z-01	COAD	2.835942818	3.824704533
1883	TCGA-AA-A024-01	COAD	2.511699704	3.225075786
1884	TCGA-AA-A029-01	COAD	0	5.190510248
1885	TCGA-AA-A02E-01	COAD	3.967613733	4.066242797
1886	TCGA-AA-A02F-01	COAD	1.745203196	6.038379368
1887	TCGA-AA-A02H-01	COAD	2.320658072	4.091521916
1888	TCGA-AA-A02J-01	COAD	0	4.897040304
1889	TCGA-AA-A02O-01	COAD	4.477823029	4.216809033
1890	TCGA-AA-A02R-01	COAD	36.19818075	5.726051695
1891	TCGA-AA-A02W-01	COAD	2.712430081	4.238083998
1892	TCGA-AA-A02Y-01	COAD	3.320191327	4.90154487
1893	TCGA-AA-A03F-01	COAD	3.422669866	2.372565365
1894	TCGA-AA-A03J-01	COAD	2.328021098	2.880689732
1895	TCGA-AD-5900-01	COAD	35.35743232	6.581747444
1896	TCGA-AD-6548-01	COAD	3.010541614	6.28523377
1897	TCGA-AD-6888-01	COAD	2.507824023	5.078022323
1898	TCGA-AD-6889-01	COAD	43.03975439	5.636958026
1899	TCGA-AD-6890-01	COAD	2.359948085	5.653986772
1900	TCGA-AD-6895-01	COAD	38.70972236	5.469722832
1901	TCGA-AD-6899-01	COAD	3.420528483	3.985432597
1902	TCGA-AD-6901-01	COAD	5.571305795	2.522335359
1903	TCGA-AD-6963-01	COAD	1.705764629	6.129247954
1904	TCGA-AD-6964-01	COAD	35.2693136	5.184112835
1905	TCGA-AD-6965-01	COAD	2.703969841	5.438702819
1906	TCGA-AD-A5EJ-01	COAD	37.38963198	5.83785436
1907	TCGA-AD-A5EK-01	COAD	1.848311584	5.629886249
1908	TCGA-AM-5820-01	COAD	1.718521057	4.785846635
1909	TCGA-AM-5821-01	COAD	30.00368715	6.457327692
1910	TCGA-AU-3779-01	COAD	2.322284959	4.798039445
1911	TCGA-AU-6004-01	COAD	24.33113237	6.027743826
1912	TCGA-AY-4070-01	COAD	4.268624084	3.64008856
1913	TCGA-AY-4071-01	COAD	3.172862836	3.679697637
1914	TCGA-AY-5543-01	COAD	2.283850026	4.811942405
1915	TCGA-AY-6196-01	COAD	5.418387463	3.097361122
1916	TCGA-AY-6197-01	COAD	27.32478418	6.159337099
1917	TCGA-AY-6386-01	COAD	2.575791723	5.694009752
1918	TCGA-AY-A54L-01	COAD	3.475611917	6.582350133
1919	TCGA-AY-A69D-01	COAD	4.346186341	5.342646245
1920	TCGA-AY-A71X-01	COAD	2.119342154	4.959967616
1921	TCGA-AY-A8YK-01	COAD	1.393258302	4.544459577
1922	TCGA-AZ-4315-01	COAD	158.5655486	6.091243202
1923	TCGA-AZ-4323-01	COAD	1.169962809	4.722339195
1924	TCGA-AZ-4615-01	COAD	24.52054162	6.622625701
1925	TCGA-AZ-4616-01	COAD	2.643624662	5.503663545
1926	TCGA-AZ-4682-01	COAD	1.795500834	4.953996856
1927	TCGA-AZ-5403-01	COAD	1.848882384	4.398510913
1928	TCGA-AZ-5407-01	COAD	2.310653375	5.986905098
1929	TCGA-AZ-6598-01	COAD	56.57541925	6.453795815
1930	TCGA-AZ-6599-01	COAD	5.48784818	4.848869712
1931	TCGA-AZ-6600-01	COAD	3.085974204	4.676721373
1932	TCGA-AZ-6603-01	COAD	1.791675792	4.062636257
1933	TCGA-AZ-6605-01	COAD	2.591610217	4.158644624
1934	TCGA-AZ-6606-01	COAD	3.273847001	4.386674902
1935	TCGA-AZ-6607-01	COAD	1.620579501	4.088782386
1936	TCGA-CA-5254-01	COAD	4.914038241	5.210945228
1937	TCGA-CA-5255-01	COAD	1.127378875	5.080657661
1938	TCGA-CA-5796-01	COAD	1.428490019	4.447508305
1939	TCGA-CA-5797-01	COAD	1.437994253	4.327579987
1940	TCGA-CA-6715-01	COAD	2.358608758	5.831891651
1941	TCGA-CA-6716-01	COAD	3.601951946	4.758442424
1942	TCGA-CA-6717-01	COAD	246.3268291	5.632604691
1943	TCGA-CA-6718-01	COAD	89.14486172	6.654057796
1944	TCGA-CA-6719-01	COAD	3.002332013	3.0853392
1945	TCGA-CK-4947-01	COAD	2.098161977	5.990490703
1946	TCGA-CK-4948-01	COAD	2.368066703	4.932930625
1947	TCGA-CK-4950-01	COAD	4.143053321	5.255152026
1948	TCGA-CK-4951-01	COAD	106.0945212	6.121294815
1949	TCGA-CK-4952-01	COAD	3.436616016	5.436586052
1950	TCGA-CK-5912-01	COAD	1.423344523	4.720547752
1951	TCGA-CK-5913-01	COAD	19.64755217	7.090223318
1952	TCGA-CK-5914-01	COAD	3.153406166	5.970456156
1953	TCGA-CK-5915-01	COAD	2.013302595	6.782943966
1954	TCGA-CK-5916-01	COAD	33.7740575	6.289334322
1955	TCGA-CK-6746-01	COAD	31.34443997	7.218106581
1956	TCGA-CK-6747-01	COAD	3.445745209	5.637299938
1957	TCGA-CK-6748-01	COAD	1.288351057	4.334064528
1958	TCGA-CK-6751-01	COAD	4.114892391	5.963710052
1959	TCGA-CM-4743-01	COAD	26.97734549	5.342422292
1960	TCGA-CM-4744-01	COAD	3.344955052	5.952221481
1961	TCGA-CM-4746-01	COAD	17.8105698	5.184056218
1962	TCGA-CM-4747-01	COAD	1.930873754	3.02253489
1963	TCGA-CM-4748-01	COAD	1.589567352	4.071979224
1964	TCGA-CM-4750-01	COAD	2.085849224	5.286920893
1965	TCGA-CM-4751-01	COAD	2.215947515	4.375981081
1966	TCGA-CM-4752-01	COAD	2.658521283	3.599870509
1967	TCGA-CM-5341-01	COAD	3.644505951	5.837117859
1968	TCGA-CM-5344-01	COAD	1.383184317	3.650213115
1969	TCGA-CM-5348-01	COAD	3.986320221	3.041852465
1970	TCGA-CM-5349-01	COAD	2.285882731	4.272950877
1971	TCGA-CM-5860-01	COAD	2.499761008	4.291935669
1972	TCGA-CM-5861-01	COAD	33.58665376	6.073499474
1973	TCGA-CM-5862-01	COAD	2.089639606	3.937575581
1974	TCGA-CM-5863-01	COAD	1.58924977	4.321965585
1975	TCGA-CM-5864-01	COAD	4.440169649	6.452149083
1976	TCGA-CM-5868-01	COAD	2.017775255	5.279462006
1977	TCGA-CM-6161-01	COAD	1.874838327	6.202651252
1978	TCGA-CM-6162-01	COAD	25.18735289	5.551862889
1979	TCGA-CM-6163-01	COAD	2.358035256	4.159841009
1980	TCGA-CM-6164-01	COAD	1.557243943	5.2398955
1981	TCGA-CM-6165-01	COAD	2.543614297	5.305403361
1982	TCGA-CM-6166-01	COAD	1.991372467	4.639711503
1983	TCGA-CM-6167-01	COAD	1.834611345	4.435851972
1984	TCGA-CM-6168-01	COAD	5.075837968	6.555603796
1985	TCGA-CM-6169-01	COAD	2.516664386	3.754123964
1986	TCGA-CM-6170-01	COAD	1.941052945	3.812380777
1987	TCGA-CM-6171-01	COAD	28.70875296	5.946395585
1988	TCGA-CM-6172-01	COAD	2.031593256	4.794139534
1989	TCGA-CM-6674-01	COAD	21.1150394	5.924142073
1990	TCGA-CM-6675-01	COAD	2.012960692	5.045250927
1991	TCGA-CM-6676-01	COAD	2.329216796	5.546481759
1992	TCGA-CM-6677-01	COAD	3.327886874	5.778029575
1993	TCGA-CM-6678-01	COAD	3.077742601	4.789106785
1994	TCGA-CM-6679-01	COAD	1.671793856	3.833534044
1995	TCGA-D5-5537-01	COAD	2.346715228	4.856419879
1996	TCGA-D5-5538-01	COAD	2.534419813	4.582063797
1997	TCGA-D5-5539-01	COAD	2.261442568	4.843841648
1998	TCGA-D5-5540-01	COAD	2.558889843	6.285304071
1999	TCGA-D5-5541-01	COAD	1.347579704	4.715497483
[truncated: 7,385 more rows]
