# Supplementary material for: PDZ Binding Kinase/T-LAK Cell-Derived Protein Kinase Plays an Oncogenic Role and Promotes Immune Escape in Human Tumors
Source: J Oncol. 2021 Sep 23;2021:8892479. doi: 10.1155/2021/8892479 (PMC8486520; doi:10.1155/2021/8892479)
Supplement: Supplementary Materials — Table S1: expression comparison of PBK/TOPK expression in tumor and normal tissues across cancers from TCGA and GTEx. Table S2: the correlation of PBK/TOPK expression with immune cells in TIMER2.0. Table S3: the correlation of PBK/TOPK expression with TMB across cancers from TCGA. Table S4: the correlation of PBK/TOPK expression with MSI across cancers from TCGA. Table S5: the correlation of PBK/TOPK expression with the expression of immune checkpoints genes across cancers from TCGA. Table S6: analysis of the correlation between PBK/TOPK expression and the immune response based on TIDE in KRIC, LGG, and LIHC. Table S7: the correlations of PBK/TOPK with DNA mismatch genes and methyltransferases. Table S8: similar genes of PBK/TOPK from GEPIA2. Table S9: the correlation of PBK/TOPK with top 5 similar genes from GEPIA2. Table S10: the result of Venn. Table S11: the GO and KEGG enrichment analysis of PBK/TOPK-related differentially genes in KIRC. Table S12: the GO and KEGG enrichment analysis of PBK/TOPK-related differentially genes in LGG. Table S13: the GO and KEGG enrichment analysis of PBK/TOPK-related differentially genes in LIHC. Table S14: Gene_outcome of PBK in the TIMER2.0 database. Figure S1: PBK mRNA expression based on the pathological stage and tumor grade of other cancers in TCGA. Click the link to download the supplements: (https://pan.baidu.com/s/1GFqYHhkAK0Y_34zLnH049g) (password 1234). [file 8892479.f1.zip › 8892479.f1/Table S4.txt]

Gene1	cor	p.value
ACC	0.187	0.099031978
BLCA	0.017	0.739133535
BRCA	-0.03	0.337323934
CESC	-0.015	0.792856103
CHOL	0.153	0.372721027
COAD	0.01	0.836616726
DLBC	-0.267	0.066533454
ESCA	0.008	0.9149611
GBM	0.053	0.517129559
HNSC	0.077	0.084701129
KICH	0.039	0.759911906
KIRC	0.096	0.079346412
KIRP	0.085	0.15140303
LAML	-0.01	0.917464065
LGG	-0.046	0.305975733
LIHC	0.12	0.021224851
LUAD	-0.056	0.204489671
LUSC	0.084	0.063832736
MESO	0.258	0.019349083
OV	-0.105	0.081703151
PAAD	-0.066	0.382426552
PCPG	0.045	0.552102638
PRAD	-0.005	0.916111528
READ	0.285	0.000382316
SARC	0.275	8.88E-06
SKCM	-0.015	0.744945892
STAD	0.416	4.72E-17
TGCT	-0.108	0.214907167
THCA	-0.012	0.784486677
THYM	-0.008	0.931683451
UCEC	0.345	1.68E-16
UCS	-0.1	0.462442472
UVM	0.151	0.180131698
