# Supplementary material for: PDZ Binding Kinase/T-LAK Cell-Derived Protein Kinase Plays an Oncogenic Role and Promotes Immune Escape in Human Tumors
Source: J Oncol. 2021 Sep 23;2021:8892479. doi: 10.1155/2021/8892479 (PMC8486520; doi:10.1155/2021/8892479)
Supplement: Supplementary Materials — Table S1: expression comparison of PBK/TOPK expression in tumor and normal tissues across cancers from TCGA and GTEx. Table S2: the correlation of PBK/TOPK expression with immune cells in TIMER2.0. Table S3: the correlation of PBK/TOPK expression with TMB across cancers from TCGA. Table S4: the correlation of PBK/TOPK expression with MSI across cancers from TCGA. Table S5: the correlation of PBK/TOPK expression with the expression of immune checkpoints genes across cancers from TCGA. Table S6: analysis of the correlation between PBK/TOPK expression and the immune response based on TIDE in KRIC, LGG, and LIHC. Table S7: the correlations of PBK/TOPK with DNA mismatch genes and methyltransferases. Table S8: similar genes of PBK/TOPK from GEPIA2. Table S9: the correlation of PBK/TOPK with top 5 similar genes from GEPIA2. Table S10: the result of Venn. Table S11: the GO and KEGG enrichment analysis of PBK/TOPK-related differentially genes in KIRC. Table S12: the GO and KEGG enrichment analysis of PBK/TOPK-related differentially genes in LGG. Table S13: the GO and KEGG enrichment analysis of PBK/TOPK-related differentially genes in LIHC. Table S14: Gene_outcome of PBK in the TIMER2.0 database. Figure S1: PBK mRNA expression based on the pathological stage and tumor grade of other cancers in TCGA. Click the link to download the supplements: (https://pan.baidu.com/s/1GFqYHhkAK0Y_34zLnH049g) (password 1234). [file 8892479.f1.zip › 8892479.f1/Table S5.txt]

Type	Genes	Cor	pvalue	pstar
ACC	CD274	-0.088	0.43891976
ACC	CTLA4	-0.235	0.036993013	*
ACC	HAVCR2	0.024	0.831899816
ACC	LAG3	0.11	0.334857076
ACC	PDCD1	-0.162	0.153700096
ACC	PDCD1LG2	-0.157	0.167437676
ACC	TIGIT	-0.226	0.045306505	*
ACC	SIGLEC15	0.008	0.945126949
BLCA	CD274	0.213	1.50E-05	**
BLCA	CTLA4	0.096	0.052687265
BLCA	HAVCR2	0.114	0.021821726	*
BLCA	LAG3	0.206	2.77E-05	**
BLCA	PDCD1	0.08	0.108492504
BLCA	PDCD1LG2	0.166	0.000781213	**
BLCA	TIGIT	0.091	0.066092984
BLCA	SIGLEC15	-0.337	3.58E-12	**
BRCA	CD274	0.05	0.096036288
BRCA	CTLA4	0.086	0.004567249	**
BRCA	HAVCR2	0.034	0.259081754
BRCA	LAG3	0.161	8.69E-08	**
BRCA	PDCD1	0.024	0.433716584
BRCA	PDCD1LG2	0.035	0.240547297
BRCA	TIGIT	0.069	0.022738041	*
BRCA	SIGLEC15	-0.308	1.81E-25	**
CESC	CD274	-0.047	0.411247446
CESC	CTLA4	-0.059	0.305540545
CESC	HAVCR2	-0.058	0.309598044
CESC	LAG3	0	0.995939965
CESC	PDCD1	-0.063	0.273322633
CESC	PDCD1LG2	-0.076	0.186670098
CESC	TIGIT	-0.035	0.537135909
CESC	SIGLEC15	0.093	0.103255179
CHOL	CD274	-0.128	0.454762723
CHOL	CTLA4	-0.162	0.344888894
CHOL	HAVCR2	-0.271	0.10984116
CHOL	LAG3	-0.004	0.982671284
CHOL	PDCD1	0.077	0.652258531
CHOL	PDCD1LG2	-0.321	0.056370933
CHOL	TIGIT	-0.29	0.086926084
CHOL	SIGLEC15	-0.034	0.841467122
COAD	CD274	0.235	4.32E-07	**
COAD	CTLA4	0.11	0.018468121	*
COAD	HAVCR2	0.135	0.003855378	**
COAD	LAG3	0.166	0.000389781	**
COAD	PDCD1	0.086	0.066383254
COAD	PDCD1LG2	0.144	0.002064096	**
COAD	TIGIT	0.137	0.003337661	**
COAD	SIGLEC15	-0.112	0.017281883	*
DLBC	CD274	0.092	0.532603071
DLBC	CTLA4	-0.164	0.263099347
DLBC	HAVCR2	0.106	0.471439988
DLBC	LAG3	-0.107	0.469165583
DLBC	PDCD1	0.054	0.716606878
DLBC	PDCD1LG2	0.114	0.437516228
DLBC	TIGIT	-0.253	0.082288711
DLBC	SIGLEC15	-0.06	0.684411724
ESCA	CD274	-0.044	0.578276802
ESCA	CTLA4	0.008	0.919183157
ESCA	HAVCR2	-0.094	0.235495644
ESCA	LAG3	-0.01	0.900113759
ESCA	PDCD1	-0.058	0.463601551
ESCA	PDCD1LG2	-0.069	0.380304595
ESCA	TIGIT	-0.044	0.573669092
ESCA	SIGLEC15	0.064	0.41703611
GBM	CD274	-0.283	0.000411931	**
GBM	CTLA4	-0.277	0.000522601	**
GBM	HAVCR2	-0.346	1.35E-05	**
GBM	LAG3	0.098	0.226123475
GBM	PDCD1	-0.064	0.43275299
GBM	PDCD1LG2	-0.33	3.36E-05	**
GBM	TIGIT	-0.201	0.012782933	*
GBM	SIGLEC15	-0.138	0.088291465
HNSC	CD274	0.078	0.080529053
HNSC	CTLA4	0.102	0.0222874	*
HNSC	HAVCR2	0.098	0.028909563	*
HNSC	LAG3	0.147	0.000979819	**
HNSC	PDCD1	0.145	0.001095056	**
HNSC	PDCD1LG2	-0.028	0.535399241
HNSC	TIGIT	0.085	0.058072225
HNSC	SIGLEC15	0.043	0.34110657
KICH	CD274	0.185	0.140058747
KICH	CTLA4	0.102	0.421020971
KICH	HAVCR2	-0.164	0.191448737
KICH	LAG3	0.023	0.853856656
KICH	PDCD1	-0.082	0.516241169
KICH	PDCD1LG2	0.036	0.777966684
KICH	TIGIT	0.032	0.799586152
KICH	SIGLEC15	0.384	0.001697728	**
KIRC	CD274	0.061	0.160068768
KIRC	CTLA4	0.168	0.000105328	**
KIRC	HAVCR2	0.168	0.000109104	**
KIRC	LAG3	0.163	0.000171947	**
KIRC	PDCD1	0.109	0.011886646	*
KIRC	PDCD1LG2	0.251	5.02E-09	**
KIRC	TIGIT	0.198	4.67E-06	**
KIRC	SIGLEC15	0.131	0.002531265	**
KIRP	CD274	-0.08	0.175429397
KIRP	CTLA4	-0.025	0.675239102
KIRP	HAVCR2	-0.114	0.05417597
KIRP	LAG3	0.051	0.392104279
KIRP	PDCD1	0.018	0.762794483
KIRP	PDCD1LG2	0.032	0.591721511
KIRP	TIGIT	-0.003	0.956862741
KIRP	SIGLEC15	-0.06	0.312465619
LAML	CD274	0.083	0.310507727
LAML	CTLA4	0.156	0.055506881
LAML	HAVCR2	-0.324	5.34E-05	**
LAML	LAG3	-0.029	0.722267287
LAML	PDCD1	-0.059	0.469087466
LAML	PDCD1LG2	0.07	0.391181733
LAML	TIGIT	0.112	0.169113841
LAML	SIGLEC15	-0.185	0.023328347	*
LGG	CD274	-0.028	0.53139479
LGG	CTLA4	0.151	0.00060036	**
LGG	HAVCR2	0.12	0.006713849	**
LGG	LAG3	0.304	3.04E-12	**
LGG	PDCD1	0.172	9.12E-05	**
LGG	PDCD1LG2	0.138	0.001834271	**
LGG	TIGIT	-0.044	0.325986009
LGG	SIGLEC15	0.12	0.00646767	**
LIHC	CD274	0.199	0.000113666	**
LIHC	CTLA4	0.289	1.49E-08	**
LIHC	HAVCR2	0.278	6.02E-08	**
LIHC	LAG3	0.229	8.59E-06	**
LIHC	PDCD1	0.27	1.25E-07	**
LIHC	PDCD1LG2	0.106	0.040652148	*
LIHC	TIGIT	0.254	7.93E-07	**
LIHC	SIGLEC15	0.103	0.046450392	*
LUAD	CD274	0.053	0.230453303
LUAD	CTLA4	-0.003	0.938822954
LUAD	HAVCR2	-0.039	0.377094437
LUAD	LAG3	0.134	0.002438944	**
LUAD	PDCD1	0.048	0.277200339
LUAD	PDCD1LG2	0.066	0.136064556
LUAD	TIGIT	-0.009	0.839351418
LUAD	SIGLEC15	0.013	0.774362519
LUSC	CD274	0.098	0.02902972	*
LUSC	CTLA4	-0.127	0.00458538	**
LUSC	HAVCR2	-0.171	0.000118447	**
LUSC	LAG3	0.002	0.963726158
LUSC	PDCD1	-0.114	0.010894691	*
LUSC	PDCD1LG2	-0.005	0.906843884
LUSC	TIGIT	-0.114	0.010987455	*
LUSC	SIGLEC15	-0.149	0.000850878	**
MESO	CD274	0.138	0.203850296
MESO	CTLA4	0.049	0.65209653
MESO	HAVCR2	0.058	0.597470079
MESO	LAG3	0.001	0.996001801
MESO	PDCD1	0.067	0.540631917
MESO	PDCD1LG2	0.138	0.205408907
MESO	TIGIT	0.066	0.547646093
MESO	SIGLEC15	-0.008	0.941044872
OV	CD274	0.04	0.445134026
OV	CTLA4	-0.015	0.777669724
OV	HAVCR2	-0.061	0.242036329
OV	LAG3	-0.014	0.78432755
OV	PDCD1	-0.088	0.087726359
OV	PDCD1LG2	-0.004	0.941344897
OV	TIGIT	-0.005	0.918995389
OV	SIGLEC15	-0.041	0.431877971
PAAD	CD274	0.187	0.012527492	*
PAAD	CTLA4	-0.136	0.069900783
PAAD	HAVCR2	-0.072	0.336622939
PAAD	LAG3	0.06	0.424278085
PAAD	PDCD1	-0.147	0.049986922	*
PAAD	PDCD1LG2	0.015	0.842329846
PAAD	TIGIT	-0.122	0.103870171
PAAD	SIGLEC15	0.079	0.294353217
PCPG	CD274	-0.024	0.744023706
PCPG	CTLA4	-0.009	0.907697506
PCPG	HAVCR2	0.011	0.885257602
PCPG	LAG3	0.022	0.772808723
PCPG	PDCD1	0.051	0.500483375
PCPG	PDCD1LG2	-0.012	0.871190661
PCPG	TIGIT	-0.045	0.544236132
PCPG	SIGLEC15	-0.033	0.65757668
PRAD	CD274	0.057	0.206736011
PRAD	CTLA4	0.081	0.07047277
PRAD	HAVCR2	0.26	5.09E-09	**
PRAD	LAG3	-0.164	0.000245194	**
PRAD	PDCD1	-0.02	0.648925943
PRAD	PDCD1LG2	0.094	0.03572947	*
PRAD	TIGIT	0.117	0.009395447	**
PRAD	SIGLEC15	0.053	0.237726641
READ	CD274	0.238	0.002097768	**
READ	CTLA4	0.063	0.420410361
READ	HAVCR2	-0.063	0.418835558
READ	LAG3	-0.076	0.3298986
READ	PDCD1	-0.068	0.384789583
READ	PDCD1LG2	0.049	0.534727601
READ	TIGIT	-0.004	0.95773478
READ	SIGLEC15	-0.065	0.40327806
SARC	CD274	0.093	0.136650622
SARC	CTLA4	-0.012	0.850358881
SARC	HAVCR2	-0.025	0.690651467
SARC	LAG3	-0.007	0.908362414
SARC	PDCD1	-0.078	0.212308761
SARC	PDCD1LG2	0.003	0.964211464
SARC	TIGIT	-0.045	0.469886339
SARC	SIGLEC15	0.216	0.000473101	**
SKCM	CD274	0.127	0.006048816	**
SKCM	CTLA4	0.103	0.024991396	*
SKCM	HAVCR2	0.07	0.132077748
SKCM	LAG3	-0.017	0.712176578
SKCM	PDCD1	-0.068	0.140158067
SKCM	PDCD1LG2	0.121	0.008515855	**
SKCM	TIGIT	0.031	0.504606164
SKCM	SIGLEC15	0.007	0.883456514
STAD	CD274	0.253	7.48E-07	**
STAD	CTLA4	0.128	0.012971763	*
STAD	HAVCR2	0.053	0.309865452
STAD	LAG3	0.12	0.019803076	*
STAD	PDCD1	0.013	0.808533295
STAD	PDCD1LG2	0.01	0.844611998
STAD	TIGIT	-0.014	0.791274714
STAD	SIGLEC15	-0.077	0.139074008
TGCT	CD274	0.157	0.069880749
TGCT	CTLA4	0.116	0.183619492
TGCT	HAVCR2	-0.027	0.754249586
TGCT	LAG3	0.086	0.325456761
TGCT	PDCD1	0.14	0.10611024
TGCT	PDCD1LG2	0.061	0.484665708
TGCT	TIGIT	0.117	0.176846329
TGCT	SIGLEC15	0.125	0.150262114
THCA	CD274	0.193	1.21E-05	**
THCA	CTLA4	0.261	2.24E-09	**
THCA	HAVCR2	0.258	3.60E-09	**
THCA	LAG3	0.161	0.000267228	**
THCA	PDCD1	0.081	0.067554428
THCA	PDCD1LG2	0.201	4.76E-06	**
THCA	TIGIT	0.239	5.30E-08	**
THCA	SIGLEC15	0.088	0.047647967	*
THYM	CD274	-0.216	0.018565769	*
THYM	CTLA4	-0.377	2.74E-05	**
THYM	HAVCR2	-0.387	1.64E-05	**
THYM	LAG3	-0.516	3.04E-09	**
THYM	PDCD1	0.695	2.20E-116	**
THYM	PDCD1LG2	-0.124	0.179112455
THYM	TIGIT	-0.382	2.12E-05	**
THYM	SIGLEC15	-0.221	0.015934091	*
UCEC	CD274	0.135	0.001657583	**
UCEC	CTLA4	-0.011	0.803121969
UCEC	HAVCR2	0.037	0.394730819
UCEC	LAG3	0.173	5.03E-05	**
UCEC	PDCD1	-0.036	0.405633236
UCEC	PDCD1LG2	0.167	9.60E-05	**
UCEC	TIGIT	0.105	0.014117429	*
UCEC	SIGLEC15	-0.046	0.280485724
UCS	CD274	0.288	0.031702725	*
UCS	CTLA4	-0.344	0.009374703	**
UCS	HAVCR2	0.087	0.52396558
UCS	LAG3	-0.112	0.411434343
UCS	PDCD1	-0.285	0.033898428	*
UCS	PDCD1LG2	0.057	0.677873464
UCS	TIGIT	-0.229	0.089746304
UCS	SIGLEC15	0.146	0.280747066
UVM	CD274	0.176	0.117873234
UVM	CTLA4	0.084	0.45700321
UVM	HAVCR2	0.136	0.227215312
UVM	LAG3	0.073	0.518478278
UVM	PDCD1	0.104	0.356408831
UVM	PDCD1LG2	0.097	0.391948058
UVM	TIGIT	0.062	0.587696138
UVM	SIGLEC15	0.017	0.879727289
