# Supplementary material for: PDZ Binding Kinase/T-LAK Cell-Derived Protein Kinase Plays an Oncogenic Role and Promotes Immune Escape in Human Tumors
Source: J Oncol. 2021 Sep 23;2021:8892479. doi: 10.1155/2021/8892479 (PMC8486520; doi:10.1155/2021/8892479)
Supplement: Supplementary Materials — Table S1: expression comparison of PBK/TOPK expression in tumor and normal tissues across cancers from TCGA and GTEx. Table S2: the correlation of PBK/TOPK expression with immune cells in TIMER2.0. Table S3: the correlation of PBK/TOPK expression with TMB across cancers from TCGA. Table S4: the correlation of PBK/TOPK expression with MSI across cancers from TCGA. Table S5: the correlation of PBK/TOPK expression with the expression of immune checkpoints genes across cancers from TCGA. Table S6: analysis of the correlation between PBK/TOPK expression and the immune response based on TIDE in KRIC, LGG, and LIHC. Table S7: the correlations of PBK/TOPK with DNA mismatch genes and methyltransferases. Table S8: similar genes of PBK/TOPK from GEPIA2. Table S9: the correlation of PBK/TOPK with top 5 similar genes from GEPIA2. Table S10: the result of Venn. Table S11: the GO and KEGG enrichment analysis of PBK/TOPK-related differentially genes in KIRC. Table S12: the GO and KEGG enrichment analysis of PBK/TOPK-related differentially genes in LGG. Table S13: the GO and KEGG enrichment analysis of PBK/TOPK-related differentially genes in LIHC. Table S14: Gene_outcome of PBK in the TIMER2.0 database. Figure S1: PBK mRNA expression based on the pathological stage and tumor grade of other cancers in TCGA. Click the link to download the supplements: (https://pan.baidu.com/s/1GFqYHhkAK0Y_34zLnH049g) (password 1234). [file 8892479.f1.zip › 8892479.f1/Table S6.txt]

Genes	No benefits	Responder	TIDE	IFNG	MSI Expr Sig	Merck18	CD274	CD8	CTL.flag	Dysfunction	Exclusion	MDSC	CAF	TAM M2
TCGA-DH-5140-01	FALSE	FALSE	1.94	0.33	0.15	-0.01	-0.45	0.58	FALSE	-0.64	1.94	0.19	0.1	0
TCGA-TQ-A7RM-01	FALSE	FALSE	1.79	-0.69	0.24	-0.68	-1.3	-0.72	FALSE	-1.43	1.79	0.21	-0.01	0.05
TCGA-TM-A84J-01	FALSE	FALSE	1.73	-0.68	0.14	-0.66	-0.89	-0.59	FALSE	-0.94	1.73	0.18	0.06	0.02
TCGA-HT-8011-01	FALSE	FALSE	1.7	0.25	0.27	0.04	-0.35	-0.27	FALSE	-1.01	1.7	0.19	0.05	0.01
TCGA-DU-A5TR-01	FALSE	FALSE	1.68	1.28	0.45	1.41	0.39	1.6	TRUE	1.68	-1.58	-0.15	-0.04	-0.04
TCGA-TM-A84F-01	FALSE	FALSE	1.67	3.21	0.59	1.94	1.14	1.88	TRUE	1.67	-2.06	-0.15	-0.05	-0.11
TCGA-FG-5964-01	FALSE	FALSE	1.67	0.27	0.49	0.65	0.04	0.18	TRUE	1.67	-1.05	-0.07	-0.09	0
TCGA-DU-A7T6-01	FALSE	FALSE	1.66	0.23	0.46	0.03	-0.71	0.07	FALSE	-0.16	1.66	0.2	0	0.05
TCGA-FG-A87N-01	FALSE	FALSE	1.62	-0.05	0.25	-0.15	-1	0.4	FALSE	-0.68	1.62	0.17	0.05	0.02
TCGA-DB-A75P-01	FALSE	FALSE	1.6	0.26	0.47	0.72	1.45	1.35	TRUE	1.6	0.21	-0.03	0.09	-0.02
TCGA-E1-A7YV-01	FALSE	FALSE	1.6	-0.55	0.4	-0.44	-0.23	-0.06	FALSE	-0.81	1.6	0.21	0.02	0
TCGA-HT-8018-01	FALSE	FALSE	1.58	1.31	0.41	0.67	0.32	1.02	TRUE	1.58	-0.28	-0.06	0.09	-0.07
TCGA-P5-A736-01	FALSE	FALSE	1.56	0.58	0.46	0.65	1.17	0.82	TRUE	1.56	-1.3	-0.17	0.02	-0.04
TCGA-E1-A7YI-01	FALSE	FALSE	1.53	0.05	0.15	-0.17	-1.21	0.09	FALSE	-0.91	1.53	0.21	0.02	-0.01
TCGA-HT-7477-01	FALSE	FALSE	1.45	0.55	0.22	-0.04	-0.48	-0.48	FALSE	-0.8	1.45	0.21	0.02	-0.02
TCGA-E1-5304-01	FALSE	FALSE	1.42	-0.02	0.21	-0.47	-1.31	-0.54	FALSE	-1.55	1.42	0.2	-0.05	0.05
TCGA-DB-A64W-01	TRUE	FALSE	1.41	-1.05	0.62	-0.94	-0.71	-0.15	FALSE	-0.79	1.41	0.2	-0.07	0.08
TCGA-DU-A7TJ-01	FALSE	FALSE	1.41	0.69	0.11	0.2	0.34	-0.4	FALSE	-0.59	1.41	0.12	0.11	-0.03
TCGA-S9-A7IS-01	FALSE	FALSE	1.41	0.51	0.21	0.08	-0.42	-0.26	FALSE	-0.83	1.41	0.22	0	-0.02
TCGA-HT-8104-01	FALSE	FALSE	1.38	1.31	0.31	0.36	1.11	0.02	FALSE	-0.39	1.38	0.12	0.14	-0.04
TCGA-HT-7880-01	FALSE	FALSE	1.37	-0.37	0.67	-0.16	0	0.53	TRUE	1.37	-0.54	-0.06	-0.05	0.03
TCGA-FG-A4MW-01	FALSE	FALSE	1.33	0.89	0.4	0.13	-0.15	-0.16	FALSE	0.34	1.33	0.12	0.1	-0.02
TCGA-HT-7606-01	FALSE	FALSE	1.33	-0.31	0.31	-0.38	-0.71	-0.57	FALSE	-1.49	1.33	0.19	-0.04	0.04
TCGA-HT-A5RA-01	FALSE	FALSE	1.3	2.93	0.35	0.97	0.12	-0.23	FALSE	-0.48	1.3	0.12	0.15	-0.08
TCGA-S9-A7J0-01	FALSE	FALSE	1.28	-0.38	0.15	-0.37	-0.69	-0.73	FALSE	-1.17	1.28	0.21	-0.08	0.04
TCGA-DB-A4XG-01	FALSE	FALSE	1.28	-0.78	0.62	-0.72	-0.04	-0.42	FALSE	-1.04	1.28	0.15	-0.02	0.06
TCGA-VM-A8C9-01	FALSE	FALSE	1.26	1.21	0.8	1.89	0.73	2.1	TRUE	1.26	0.21	-0.03	0.08	-0.01
TCGA-DU-7010-01	FALSE	FALSE	1.25	0.75	0.21	0.01	-0.55	-0.39	FALSE	-1.17	1.25	0.15	0.04	0
TCGA-E1-A7YN-01	FALSE	FALSE	1.25	1.92	0.41	2.2	1.21	2.6	TRUE	1.25	-1.95	-0.16	0.04	-0.17
TCGA-DU-7018-01	FALSE	FALSE	1.25	-0.21	0.57	-0.42	-0.57	-0.34	FALSE	-0.89	1.25	0.18	-0.02	0.03
TCGA-DU-6406-01	FALSE	FALSE	1.24	2.61	0.08	0.92	2.52	-0.4	FALSE	-0.25	1.24	0.16	0.09	-0.06
TCGA-FG-5963-01	FALSE	FALSE	1.23	1.61	0.13	1.38	0.58	1.59	TRUE	1.23	-0.42	-0.04	0.05	-0.06
TCGA-CS-6188-01	FALSE	FALSE	1.2	0.59	0.18	0.16	0.16	-0.54	FALSE	-0.34	1.2	0.06	0.18	-0.06
TCGA-HT-7875-01	FALSE	FALSE	1.18	-0.39	0.54	-0.59	-0.53	-0.41	FALSE	-0.43	1.18	0.06	0.06	0.06
TCGA-DU-6404-01	FALSE	FALSE	1.17	1.17	0.31	0.41	-0.66	0.17	FALSE	0.14	1.17	0.09	0.11	-0.02
TCGA-TM-A7C3-01	FALSE	FALSE	1.16	0.62	0.19	0.07	0.01	-0.02	FALSE	-0.57	1.16	0.1	0.08	-0.01
TCGA-DU-6405-01	FALSE	FALSE	1.14	0.64	0.27	0.32	1.41	-0.34	FALSE	-0.4	1.14	0.1	0.11	-0.05
TCGA-DB-A4XA-01	FALSE	FALSE	1.1	0.22	0.51	0.4	0.01	0.6	TRUE	1.1	-0.41	-0.05	-0.05	0.04
TCGA-HT-8015-01	FALSE	FALSE	1.1	0.08	0.63	0.05	0.4	0.86	TRUE	1.1	-0.53	-0.06	0	-0.02
TCGA-FG-A4MU-01	FALSE	FALSE	1.1	2.21	0.14	0.89	0.96	-0.39	FALSE	-0.13	1.1	0.08	0.16	-0.08
TCGA-HT-A5RC-01	FALSE	FALSE	1.09	0.03	0.17	0.2	2.67	-0.21	FALSE	-0.38	1.09	0.05	0.15	-0.04
TCGA-P5-A72X-01	FALSE	FALSE	1.09	0.05	0.34	0.21	0.19	0.32	TRUE	1.09	0.21	-0.01	0.08	-0.04
TCGA-VM-A8CA-01	FALSE	FALSE	1.09	0.25	0.77	0.32	0.76	0.72	TRUE	1.09	-0.18	-0.03	0.02	-0.02
TCGA-DB-A64V-01	FALSE	FALSE	1.08	1.01	0.65	0.98	0.43	1.29	TRUE	1.08	-1.41	-0.15	-0.02	-0.05
TCGA-WY-A858-01	FALSE	FALSE	1.07	0.58	0.39	0.85	0.34	0.51	TRUE	1.07	-1.31	-0.1	-0.07	-0.02
TCGA-TM-A84C-01	FALSE	FALSE	1.07	0.82	0.28	0.35	0.98	-0.21	FALSE	-0.11	1.07	0.04	0.2	-0.08
TCGA-TM-A84M-01	FALSE	FALSE	1.07	-0.51	0.45	-0.44	-0.88	-0.51	FALSE	-0.74	1.07	0.13	-0.01	0.04
TCGA-DU-A76L-01	FALSE	FALSE	1.06	1.76	0.11	0.88	2.26	0.35	FALSE	0.07	1.06	0.08	0.18	-0.1
TCGA-S9-A6WL-01	FALSE	FALSE	1.06	-0.19	0.38	-0.35	0.11	-0.26	FALSE	0.37	1.06	0.07	0.07	0.02
TCGA-F6-A8O3-01	FALSE	FALSE	1.04	-0.49	0.61	-0.5	-0.75	-0.23	FALSE	-0.88	1.04	0.12	-0.04	0.07
TCGA-S9-A6WG-01	FALSE	FALSE	1.04	0.6	0.25	0.61	0.28	0.43	TRUE	1.04	0.52	0.04	0.14	-0.1
TCGA-HT-A74O-01	FALSE	FALSE	1.03	0.99	0.52	1.31	0.34	0.72	TRUE	1.03	-0.54	-0.05	-0.01	-0.02
TCGA-DU-A6S3-01	FALSE	FALSE	1.03	-0.54	0.58	-0.29	-0.46	0.26	TRUE	1.03	0.25	0.08	-0.11	0.06
TCGA-DU-7292-01	FALSE	FALSE	1.03	0.24	0.51	-0.06	0.12	0.34	FALSE	0.51	1.03	0.07	0.09	0
TCGA-DU-7006-01	FALSE	FALSE	1.01	0.96	0.12	1.09	2.99	0.78	FALSE	-0.35	1.01	0.03	0.16	-0.04
TCGA-FG-7637-01	FALSE	FALSE	1	-0.24	0.6	-0.15	-0.81	-0.11	FALSE	-1.1	1	0.09	0.06	0.01
TCGA-HT-7483-01	FALSE	FALSE	1	0.06	0.53	-0.04	0.2	-0.04	FALSE	-0.52	1	0.07	0.08	0
TCGA-P5-A730-01	FALSE	FALSE	1	0.36	0.76	0.13	-0.1	0.12	FALSE	-0.84	1	0.1	0.04	0.01
TCGA-P5-A72Z-01	FALSE	FALSE	0.99	-0.47	0.39	-0.32	-0.71	-0.21	FALSE	-0.46	0.99	0.15	-0.04	0.04
TCGA-DU-7013-01	FALSE	FALSE	0.99	1.36	0.1	0.67	1.64	1.52	FALSE	-0.5	0.99	0.1	0.09	-0.04
TCGA-HT-A74K-01	FALSE	FALSE	0.99	0.17	0.65	0.46	-0.36	0.26	TRUE	0.99	0.73	0.09	0	0.02
TCGA-FG-A70Z-01	FALSE	FALSE	0.98	1.51	0.34	0.67	0.13	0.17	FALSE	1.03	0.98	0.06	0.13	-0.04
TCGA-HT-A4DV-01	FALSE	FALSE	0.98	-0.23	0.74	-0.02	-0.27	0.19	TRUE	0.98	-0.53	-0.04	-0.05	0.01
TCGA-RY-A840-01	FALSE	FALSE	0.98	-0.08	0.77	-0.04	-0.44	-0.19	FALSE	-0.53	0.98	0.11	-0.04	0.07
TCGA-S9-A6U9-01	FALSE	FALSE	0.97	0.11	0.35	0.17	0.24	0.29	TRUE	0.97	-1.5	-0.16	0.02	-0.07
TCGA-P5-A72U-01	FALSE	FALSE	0.96	1.03	0.19	1.37	1.51	1.21	TRUE	0.96	0.54	-0.01	0.14	-0.04
TCGA-FG-8181-01	FALSE	FALSE	0.95	0.31	0.82	-0.2	0.12	0.96	TRUE	0.95	-0.39	-0.03	-0.01	-0.02
TCGA-E1-A7YK-01	FALSE	FALSE	0.95	0.95	0.4	1.11	-0.1	1.26	TRUE	0.95	-0.98	-0.11	0.02	-0.06
TCGA-HT-7476-01	FALSE	FALSE	0.95	0.33	0.57	0.16	0.05	0.59	TRUE	0.95	0.45	0.01	0.05	0.02
TCGA-S9-A7IY-01	FALSE	FALSE	0.95	0.11	0.58	0.17	0.14	0.39	TRUE	0.95	-1.32	-0.15	-0.01	-0.04
TCGA-HT-7469-01	FALSE	FALSE	0.94	-0.12	0.28	-0.24	-0.43	-0.86	FALSE	-1.2	0.94	0.11	0.04	-0.01
TCGA-HT-A74H-01	FALSE	FALSE	0.93	0.62	0.59	0.77	0.43	1.41	TRUE	0.93	-0.47	-0.08	0.02	0
TCGA-DU-6393-01	FALSE	FALSE	0.92	-0.3	0.51	-0.35	-0.84	-0.44	FALSE	-0.68	0.92	0.16	-0.05	0.03
TCGA-CS-5395-01	FALSE	FALSE	0.92	-0.35	0.38	-0.34	-0.48	-0.16	FALSE	-0.56	0.92	0.06	0.06	0.02
TCGA-HT-A4DS-01	FALSE	FALSE	0.92	1.7	0.73	1.48	0.73	0.89	TRUE	0.92	0.12	0.05	-0.01	-0.03
TCGA-HT-8564-01	FALSE	FALSE	0.92	0.77	0.39	0.41	0.62	0.77	TRUE	0.92	0.29	0.02	0.04	-0.01
TCGA-P5-A5ET-01	FALSE	FALSE	0.92	-0.88	0.69	-0.5	-0.55	-0.11	FALSE	-0.07	0.92	0.09	-0.05	0.1
TCGA-P5-A5EY-01	FALSE	FALSE	0.9	0.57	0.72	0.6	0.48	1.59	TRUE	0.9	-0.24	-0.06	0.03	0
TCGA-DH-A669-01	FALSE	FALSE	0.9	2.18	0.31	0.93	0.76	-0.24	FALSE	-0.4	0.9	0.18	-0.01	-0.05
TCGA-HT-7857-01	FALSE	FALSE	0.9	2.76	0.13	2.33	3.19	2.03	TRUE	0.9	-0.16	-0.07	0.14	-0.09
TCGA-FG-A4MT-01	FALSE	FALSE	0.89	-0.55	0.63	-0.38	-0.2	-0.48	FALSE	-0.35	0.89	0.11	-0.04	0.06
TCGA-DB-5281-01	FALSE	FALSE	0.89	-0.07	0.36	-0.16	0.13	-0.02	FALSE	0.24	0.89	0.05	0.1	0
TCGA-CS-6666-01	FALSE	FALSE	0.89	0.64	0.21	0.31	-0.22	0.01	FALSE	-0.78	0.89	0.08	0.06	0
TCGA-DU-6410-01	FALSE	FALSE	0.89	-0.6	0.41	-0.77	-0.79	-0.29	FALSE	-1.12	0.89	0.14	-0.06	0.05
TCGA-CS-5397-01	FALSE	FALSE	0.89	0.33	0.31	0.01	1.01	0.05	FALSE	0.2	0.89	0.04	0.12	-0.02
TCGA-TQ-A7RN-01	FALSE	FALSE	0.88	-0.35	0.52	-0.21	-0.69	-0.35	FALSE	-0.56	0.88	0.08	0	0.06
TCGA-DB-5277-01	FALSE	FALSE	0.88	0.28	0.24	-0.12	-0.51	-0.27	FALSE	-1.03	0.88	0.12	-0.02	0.03
TCGA-S9-A7QW-01	FALSE	FALSE	0.87	-0.21	0.76	-0.51	-0.68	-0.16	FALSE	-0.66	0.87	0.14	-0.07	0.06
TCGA-FG-A60L-01	FALSE	FALSE	0.86	0.03	0.81	0.5	0.48	0.18	TRUE	0.86	-0.55	-0.03	-0.06	0
TCGA-VW-A7QS-01	FALSE	FALSE	0.85	-0.19	0.78	-0.03	0.57	-0.3	FALSE	-0.59	0.85	0.09	0.06	-0.02
TCGA-DU-5849-01	FALSE	FALSE	0.85	-0.02	0.6	-0.06	-0.07	0.42	TRUE	0.85	-0.3	-0.01	-0.04	0.01
TCGA-TM-A84G-01	FALSE	FALSE	0.84	-0.33	0.47	-0.47	-0.78	-0.57	FALSE	-0.7	0.84	0.09	-0.02	0.05
TCGA-FG-A6J1-01	FALSE	FALSE	0.84	-0.11	0.81	0.44	-0.24	0.08	TRUE	0.84	0.32	0.05	-0.06	0.05
TCGA-TM-A84I-01	FALSE	FALSE	0.83	0.27	0.23	0.06	-0.52	0.16	FALSE	-1.15	0.83	0.12	-0.02	0.02
TCGA-HT-7604-01	FALSE	FALSE	0.82	-0.37	0.57	-0.41	-0.31	-0.59	FALSE	-1.37	0.82	0.1	-0.01	0.02
TCGA-DU-A7T8-01	FALSE	FALSE	0.82	1.01	0.39	0.4	0.34	0.15	TRUE	0.82	0.46	0.04	0.08	-0.05
TCGA-DB-A4XE-01	FALSE	FALSE	0.82	-0.62	0.44	-0.62	-0.43	-0.48	FALSE	-0.48	0.82	0.11	-0.04	0.05
TCGA-S9-A7J2-01	FALSE	FALSE	0.81	-0.92	0.53	-0.48	-0.48	-0.36	FALSE	-0.29	0.81	0.07	0.01	0.04
TCGA-DU-5874-01	FALSE	FALSE	0.8	-0.44	0.41	-0.22	-0.58	-0.28	FALSE	-0.5	0.8	0.13	-0.06	0.04
TCGA-HT-8113-01	FALSE	FALSE	0.8	-0.36	0.85	-0.4	0.14	0.55	TRUE	0.8	-0.39	-0.02	-0.05	0.02
TCGA-HT-7468-01	FALSE	FALSE	0.79	0	0.5	-0.09	-0.26	0.07	FALSE	-1.43	0.79	0.07	0.03	0.02
TCGA-P5-A731-01	FALSE	FALSE	0.78	0.65	0.6	0.28	1.36	0.24	TRUE	0.78	1.05	0.04	0.17	-0.04
TCGA-R8-A6ML-01	FALSE	FALSE	0.77	-0.32	0.66	-0.11	-0.39	-0.01	FALSE	-0.78	0.77	0.07	0.04	0
TCGA-IK-7675-01	FALSE	FALSE	0.77	-0.35	0.24	-0.45	-0.38	-0.28	FALSE	-1.18	0.77	0.07	0.02	0.03
TCGA-DU-6407-01	FALSE	FALSE	0.76	-0.33	0.5	-0.28	-0.09	-0.38	FALSE	-0.53	0.76	0.07	0.03	0.03
TCGA-DU-6394-01	FALSE	FALSE	0.76	0.72	0.36	0.11	1.18	-0.55	FALSE	-0.64	0.76	0.09	0.07	-0.04
TCGA-HT-7681-01	FALSE	FALSE	0.74	0.74	0.77	0.53	-0.22	1.05	TRUE	0.74	0.1	-0.02	0.01	0.03
TCGA-R8-A73M-01	FALSE	FALSE	0.74	-0.36	0.86	-0.11	-0.41	-0.03	FALSE	0.04	0.74	0.11	-0.07	0.06
TCGA-DU-7011-01	FALSE	FALSE	0.74	1.3	0.43	0.72	0.56	0.38	TRUE	0.74	-0.89	-0.15	0.04	-0.01
TCGA-S9-A6U5-01	FALSE	FALSE	0.73	1.02	0.57	0.95	0.1	1.32	TRUE	0.73	-0.5	-0.09	0.03	-0.01
TCGA-P5-A5EU-01	FALSE	FALSE	0.72	2.51	0.28	1.13	1.57	-0.39	FALSE	-0.48	0.72	0.09	0.1	-0.08
TCGA-CS-5396-01	FALSE	FALSE	0.72	0.55	0.43	0.3	-0.2	-0.23	FALSE	-0.45	0.72	0.03	0.09	-0.01
TCGA-DU-8168-01	FALSE	FALSE	0.72	-0.16	0.42	-0.32	-0.19	-0.52	FALSE	-0.77	0.72	0.13	-0.06	0.04
TCGA-HT-7478-01	FALSE	FALSE	0.72	1.54	0.4	1.31	0.47	0.87	TRUE	0.72	-1.32	-0.15	0.03	-0.08
TCGA-S9-A6UB-01	FALSE	FALSE	0.71	-0.84	0.65	-0.57	-0.86	-0.55	FALSE	-0.85	0.71	0.11	-0.07	0.06
TCGA-DH-A7UR-01	FALSE	FALSE	0.71	-0.06	0.43	-0.11	-0.58	-0.14	FALSE	0.06	0.71	0.17	-0.1	0.04
TCGA-E1-5318-01	FALSE	FALSE	0.71	0.27	0.42	-0.02	-0.33	-0.37	FALSE	-0.72	0.71	0.07	0.01	0.03
TCGA-CS-5390-01	FALSE	FALSE	0.7	-0.01	0.64	-0.19	-0.43	0.27	FALSE	-0.6	0.7	0.13	-0.06	0.04
TCGA-FG-7643-01	FALSE	FALSE	0.7	0.13	0.7	0.12	1.45	0.5	TRUE	0.7	-0.05	-0.03	0.04	-0.01
TCGA-E1-A7Z2-01	FALSE	FALSE	0.69	-0.41	0.53	-0.56	-0.2	-0.02	FALSE	0.52	0.69	0.07	0.02	0.02
TCGA-FG-7634-01	FALSE	FALSE	0.68	0.6	0.19	0.23	-0.42	-0.67	FALSE	-0.34	0.68	0.02	0.13	-0.04
TCGA-DB-A64R-01	FALSE	FALSE	0.68	-0.75	0.58	-0.59	-0.89	-0.6	FALSE	-0.61	0.68	0.07	-0.02	0.05
TCGA-WY-A85E-01	FALSE	FALSE	0.67	0.04	0.47	-0.35	-0.63	-0.02	FALSE	-0.48	0.67	0.12	-0.04	0.01
TCGA-DU-A76K-01	FALSE	FALSE	0.67	-0.13	0.65	-0.09	0.04	0.35	TRUE	0.67	0.93	0.08	0.06	0
TCGA-S9-A6UA-01	FALSE	FALSE	0.67	1.72	0.2	1.79	1.28	1.87	TRUE	0.67	0.96	0.02	0.2	-0.07
TCGA-QH-A6CX-01	FALSE	FALSE	0.66	0.39	0.63	0.55	0.71	0.47	TRUE	0.66	-0.14	-0.07	0.11	-0.06
TCGA-DU-7294-01	FALSE	FALSE	0.66	-0.43	0.58	-0.41	-0.65	-0.21	FALSE	-1.29	0.66	0.07	-0.03	0.05
TCGA-DU-7008-01	FALSE	FALSE	0.66	-0.37	0.58	-0.41	-0.4	-0.11	FALSE	-0.46	0.66	0.11	-0.08	0.07
TCGA-E1-5311-01	FALSE	FALSE	0.66	-0.9	0.58	-0.61	-0.46	-0.11	FALSE	-0.23	0.66	0.08	0	0.03
TCGA-P5-A5F4-01	FALSE	FALSE	0.65	-0.6	0.71	-0.38	0.11	0.52	TRUE	0.65	0.39	0.06	-0.06	0.06
TCGA-TM-A84O-01	FALSE	FALSE	0.65	0.01	0.43	0.08	-0.62	0.05	FALSE	0.23	0.65	0.05	0.02	0.03
TCGA-HT-7690-01	FALSE	FALSE	0.64	1.34	0.33	0.91	-0.22	0.39	TRUE	0.64	0.38	0	0.08	-0.02
TCGA-CS-4943-01	FALSE	FALSE	0.64	0.12	0.28	-0.12	-0.71	-0.42	FALSE	-1.14	0.64	0.14	-0.09	0.03
TCGA-HT-A619-01	FALSE	FALSE	0.64	0.2	0.5	-0.1	-0.93	-0.02	FALSE	-1.01	0.64	0.12	-0.08	0.05
TCGA-QH-A65X-01	FALSE	FALSE	0.64	0.92	0.77	0.94	-0.61	0.63	TRUE	0.64	1.04	0.13	0	0.02
TCGA-DU-A76R-01	FALSE	FALSE	0.62	-0.29	0.62	-0.18	0.62	-0.24	FALSE	0.14	0.62	0.01	0.08	0.01
TCGA-HT-7474-01	FALSE	FALSE	0.62	0.22	0.68	-0.14	-0.07	0.3	TRUE	0.62	-0.23	-0.03	0.01	0
TCGA-DU-8164-01	FALSE	FALSE	0.62	-0.59	0.56	-0.48	-0.32	-0.4	FALSE	-0.79	0.62	0.07	-0.03	0.05
TCGA-RY-A83Z-01	FALSE	FALSE	0.62	-0.27	0.69	0.17	-0.87	-0.06	FALSE	-0.13	0.62	0.13	-0.1	0.04
TCGA-FG-8185-01	FALSE	FALSE	0.61	-0.03	0.55	-0.04	-0.46	-0.16	FALSE	-0.81	0.61	0.07	0	0.01
TCGA-QH-A6XC-01	FALSE	FALSE	0.59	0.95	0.48	0.28	0.31	0.04	FALSE	1.04	0.59	0.08	0.04	-0.03
TCGA-CS-5394-01	FALSE	FALSE	0.59	-0.02	0.59	-0.05	-0.7	-0.32	FALSE	-1.08	0.59	0.09	-0.04	0.04
TCGA-HT-7882-01	FALSE	FALSE	0.59	1.93	0.09	1.88	2.18	2.43	TRUE	0.59	0.45	-0.07	0.25	-0.1
TCGA-S9-A6U0-01	FALSE	FALSE	0.58	2.08	0.13	1.58	0.56	1.5	TRUE	0.58	0.65	0.02	0.14	-0.05
TCGA-EZ-7264-01	FALSE	FALSE	0.58	-0.7	0.51	-0.42	-0.68	-0.38	FALSE	-1.2	0.58	0.07	-0.03	0.05
TCGA-S9-A7QZ-01	FALSE	FALSE	0.58	-0.54	0.56	-0.34	-0.5	0.02	FALSE	0.45	0.58	0.08	-0.05	0.06
TCGA-QH-A86X-01	FALSE	FALSE	0.57	-0.43	0.63	0	-0.31	0.28	FALSE	0	0.57	0.04	0	0.04
TCGA-S9-A6WP-01	FALSE	FALSE	0.57	0.21	0.38	0.36	-0.07	0.21	TRUE	0.57	-0.61	-0.02	-0.09	0.01
TCGA-RY-A83Y-01	FALSE	FALSE	0.55	0.15	0.75	0.6	-0.27	0.31	TRUE	0.55	-0.21	0.01	-0.06	0.01
TCGA-DU-A6S8-01	FALSE	FALSE	0.54	-0.38	0.44	-0.3	-0.76	-0.14	FALSE	-0.36	0.54	0.11	-0.09	0.06
TCGA-DB-A64P-01	FALSE	FALSE	0.54	0.4	0.65	0.03	-0.26	-0.09	FALSE	-0.53	0.54	0.06	0.01	0.01
TCGA-TQ-A7RS-01	FALSE	FALSE	0.54	-0.83	0.62	-0.54	-0.59	-0.51	FALSE	-0.34	0.54	0.06	-0.01	0.03
TCGA-RY-A83X-01	FALSE	FALSE	0.54	-1.03	0.55	-0.66	-0.7	-0.46	FALSE	-0.69	0.54	0.07	-0.04	0.05
TCGA-F6-A8O4-01	FALSE	FALSE	0.53	-0.5	0.67	-0.34	-0.36	0.02	FALSE	-0.16	0.53	0.05	-0.03	0.06
TCGA-TQ-A7RP-01	FALSE	FALSE	0.53	0.31	0.77	0.35	-0.09	0.74	TRUE	0.53	-0.07	-0.07	0.1	-0.03
TCGA-DU-A6S6-01	FALSE	FALSE	0.53	-0.93	0.54	-0.58	-0.53	0.12	FALSE	1.21	0.53	0.05	-0.02	0.05
TCGA-DU-7012-01	FALSE	FALSE	0.52	3.11	0.22	2.34	1.97	1.9	TRUE	0.52	-0.27	-0.08	0.13	-0.07
TCGA-HT-A618-01	FALSE	FALSE	0.52	1.16	0.5	0.93	0.82	0.56	TRUE	0.52	-1.56	-0.16	0	-0.07
TCGA-HT-7601-01	FALSE	FALSE	0.52	1.98	0.39	1.45	0.4	1.03	TRUE	0.52	-1.03	-0.13	0.04	-0.06
TCGA-HT-A617-01	FALSE	FALSE	0.52	1.39	0.61	1.25	1.39	0.99	TRUE	0.52	-0.13	-0.08	0.1	-0.04
TCGA-DU-8158-01	FALSE	FALSE	0.52	1.34	0.26	1.26	0.93	1.64	TRUE	0.52	-0.06	-0.04	0.1	-0.06
TCGA-E1-A7YO-01	FALSE	FALSE	0.52	-0.82	0.49	-0.37	-0.08	-0.12	FALSE	0.16	0.52	0.07	0.01	0
TCGA-HT-8110-01	FALSE	FALSE	0.52	1.87	0.44	1.12	1.07	0.2	TRUE	0.52	-1.06	-0.1	0.01	-0.07
TCGA-S9-A6TY-01	FALSE	FALSE	0.5	-0.7	0.77	-0.55	-0.24	-0.06	FALSE	-0.45	0.5	0.1	-0.1	0.08
TCGA-FG-A6J3-01	FALSE	FALSE	0.5	2.18	0.58	1.98	0.58	1.91	TRUE	0.5	0.6	0.04	0.07	-0.03
TCGA-HT-7480-01	FALSE	FALSE	0.5	-0.3	0.37	-0.37	-0.38	-0.46	FALSE	-0.03	0.5	0.03	0.01	0.04
TCGA-FG-A6IZ-01	FALSE	FALSE	0.49	0.22	0.9	0.53	-0.44	0.02	FALSE	0.19	0.49	0.08	-0.07	0.05
TCGA-DU-7300-01	FALSE	FALSE	0.49	0.54	0.6	0.39	0.19	0.59	TRUE	0.49	-0.07	-0.01	0.02	-0.01
TCGA-DB-A64Q-01	FALSE	FALSE	0.49	-0.74	0.77	-0.52	-0.54	-0.69	FALSE	-1.3	0.49	0.03	0.01	0.02
TCGA-HT-8563-01	FALSE	FALSE	0.48	4.4	0.24	3.19	2.98	1.99	TRUE	0.48	-0.99	-0.14	0.09	-0.1
TCGA-DU-8161-01	FALSE	FALSE	0.48	3.3	0.46	1.79	1.05	1.38	TRUE	0.48	-0.6	-0.06	0.07	-0.1
TCGA-HT-7684-01	FALSE	FALSE	0.48	0.5	0.9	0.48	0.47	0.31	TRUE	0.48	-0.62	-0.04	0.01	-0.07
TCGA-E1-5305-01	FALSE	FALSE	0.48	0	0.61	-0.08	-0.52	-0.26	FALSE	-0.6	0.48	0.05	0.03	0
TCGA-HW-7491-01	FALSE	FALSE	0.47	-0.32	0.38	-0.34	-0.93	-0.35	FALSE	-0.9	0.47	0.05	-0.02	0.04
TCGA-DB-5278-01	FALSE	FALSE	0.47	-0.56	0.55	-0.37	-0.65	0.04	FALSE	0.19	0.47	-0.02	0.04	0.06
TCGA-DU-6392-01	FALSE	FALSE	0.46	0.73	0.25	0.48	-0.63	0.3	TRUE	0.46	0.85	0.1	0.06	-0.02
TCGA-S9-A6WN-01	FALSE	FALSE	0.46	1.44	0.41	1.35	3.59	0.56	TRUE	0.46	-0.18	-0.08	0.13	-0.07
TCGA-DB-A4XB-01	FALSE	FALSE	0.45	-0.22	0.39	-0.23	-0.52	-0.32	FALSE	-0.31	0.45	0.07	-0.04	0.03
TCGA-DU-6397-01	FALSE	FALSE	0.45	0.14	0.49	0.32	-0.51	0.08	FALSE	0.21	0.45	0.02	0.02	0.03
TCGA-QH-A6CV-01	FALSE	FALSE	0.45	0.55	0.2	0.55	0.91	-0.15	FALSE	0.08	0.45	0.06	0.03	-0.02
TCGA-HT-7471-01	FALSE	FALSE	0.44	1.13	0.42	0.42	0.12	-0.21	FALSE	0.16	0.44	0.08	0.01	-0.03
TCGA-FG-A4MX-01	FALSE	FALSE	0.44	0.03	0.54	0.13	-0.07	0.5	TRUE	0.44	-0.57	-0.01	-0.07	-0.01
TCGA-CS-4941-01	FALSE	FALSE	0.44	2.26	0.32	1.35	2	0.83	TRUE	0.44	-0.52	-0.03	0.05	-0.1
TCGA-DB-5280-01	FALSE	FALSE	0.43	0.01	0.27	-0.19	-0.12	-0.44	FALSE	-0.66	0.43	-0.01	0.05	0.03
TCGA-DU-7302-01	FALSE	FALSE	0.43	-0.38	0.57	-0.68	-0.09	-0.19	FALSE	-0.4	0.43	0.05	-0.01	0.03
TCGA-DU-A5TW-01	FALSE	FALSE	0.42	-1.09	0.41	-0.72	0.04	-0.55	FALSE	-0.93	0.42	0.08	-0.07	0.04
TCGA-VV-A829-01	FALSE	FALSE	0.41	0.3	0.64	0.18	-0.46	-0.32	FALSE	-0.65	0.41	0.04	0.02	0.01
TCGA-DU-6396-01	FALSE	FALSE	0.41	1.88	0.17	1.3	0.12	0.67	TRUE	0.41	-1.16	-0.11	0.03	-0.09
TCGA-DU-8165-01	FALSE	FALSE	0.41	1.63	0.09	0.98	-0.3	0.77	FALSE	-0.5	0.41	0.05	0.05	-0.04
TCGA-DU-7009-01	FALSE	FALSE	0.41	-0.46	0.6	-0.6	-0.3	-0.03	FALSE	-0.91	0.41	0.07	-0.05	0.04
TCGA-HT-7677-01	FALSE	FALSE	0.41	-0.53	0.39	-0.28	-0.44	-0.26	FALSE	-0.7	0.41	0.05	0.01	0
TCGA-QH-A65R-01	FALSE	FALSE	0.41	-0.13	0.78	-0.08	-0.21	0.14	FALSE	-0.22	0.41	0.1	-0.05	0.01
TCGA-DU-5853-01	FALSE	FALSE	0.38	0.82	0.43	0.71	0.29	0.78	TRUE	0.38	-1.53	-0.16	-0.05	-0.01
TCGA-VM-A8CB-01	FALSE	FALSE	0.37	-0.15	0.87	-0.24	-0.6	-0.08	FALSE	-0.44	0.37	0.08	-0.09	0.05
TCGA-E1-A7YS-01	FALSE	FALSE	0.37	-0.37	0.56	-0.47	-0.51	-0.54	FALSE	-0.94	0.37	0.1	-0.05	0
TCGA-S9-A6TX-01	FALSE	FALSE	0.37	-0.3	0.56	0.05	-0.38	-0.16	FALSE	0.67	0.37	0.07	-0.03	0.02
TCGA-P5-A5F0-01	FALSE	FALSE	0.37	-0.72	0.57	-0.45	-0.42	0.21	FALSE	0.46	0.37	0.05	-0.07	0.06
TCGA-P5-A5EZ-01	FALSE	FALSE	0.37	0.73	0.35	0.81	0.22	1.77	TRUE	0.37	-1.06	-0.04	-0.11	0
TCGA-VM-A8CE-01	FALSE	FALSE	0.37	-0.63	0.49	-0.25	-0.2	-0.38	FALSE	0.21	0.37	-0.01	0.06	0.01
TCGA-TQ-A7RQ-01	FALSE	FALSE	0.36	-0.95	0.62	-0.56	-0.66	-0.19	FALSE	-0.06	0.36	0.06	-0.04	0.04
TCGA-TQ-A7RK-01	FALSE	FALSE	0.36	-0.45	0.45	-0.33	-0.08	-0.25	FALSE	-0.59	0.36	0.09	-0.08	0.03
TCGA-P5-A5EX-01	FALSE	FALSE	0.36	1.93	0.53	1.92	4.25	1.71	TRUE	0.36	-0.18	-0.07	0.14	-0.09
TCGA-DU-5852-01	FALSE	FALSE	0.36	1.16	0.16	0.56	0.68	0.12	TRUE	0.36	0.94	0.09	0.09	-0.03
TCGA-E1-A7YL-01	FALSE	FALSE	0.36	1.17	0.36	1.16	0.53	0.88	TRUE	0.36	0.6	0.05	0.11	-0.08
TCGA-HT-7475-01	FALSE	FALSE	0.35	-0.62	0.64	-0.49	-0.46	0.2	FALSE	-0.03	0.35	0.1	-0.11	0.06
TCGA-KT-A74X-01	FALSE	FALSE	0.35	0.22	0.58	0.26	-0.55	0.13	FALSE	-0.22	0.35	0.07	-0.06	0.03
TCGA-S9-A7IX-01	FALSE	FALSE	0.34	0.6	0.24	0.44	1.39	0.07	FALSE	1.07	0.34	0.01	0.1	-0.04
TCGA-S9-A6TW-01	FALSE	FALSE	0.34	0.29	0.56	0.4	-0.26	0.5	TRUE	0.34	0.39	0.05	-0.01	0.02
TCGA-R8-A6MK-01	FALSE	FALSE	0.34	-0.15	0.73	-0.13	0.06	-0.23	FALSE	-0.76	0.34	0.03	0	0.02
TCGA-TQ-A8XE-01	FALSE	FALSE	0.34	-0.46	0.67	-0.3	-0.41	-0.46	FALSE	-0.57	0.34	0.05	-0.03	0.03
TCGA-S9-A89V-01	FALSE	FALSE	0.34	-0.22	0.3	-0.13	0.9	0.18	FALSE	0.25	0.34	-0.03	0.11	-0.02
TCGA-DH-A7US-01	FALSE	FALSE	0.34	-0.16	0.57	-0.17	-0.49	-0.38	FALSE	0.14	0.34	0.03	-0.03	0.05
TCGA-HT-7616-01	FALSE	FALSE	0.33	2.14	0.41	1.77	0.92	1.2	TRUE	0.33	-1.09	-0.07	0.04	-0.12
TCGA-P5-A72W-01	FALSE	FALSE	0.33	0.1	0.81	0.17	0	0.18	FALSE	0.11	0.33	0.04	-0.04	0.04
TCGA-HT-7902-01	FALSE	FALSE	0.32	-0.09	0.41	-0.13	-0.15	0.16	TRUE	0.32	-0.4	-0.02	-0.01	-0.03
TCGA-HW-7495-01	FALSE	FALSE	0.31	-0.91	0.62	-0.71	-0.28	-0.18	FALSE	0.12	0.31	0.01	0.03	0.02
TCGA-DB-5273-01	FALSE	FALSE	0.31	0.97	0.46	0.66	0.38	0	FALSE	-0.03	0.31	-0.02	0.1	-0.04
TCGA-DU-5870-01	FALSE	FALSE	0.31	-0.09	0.46	0.02	-0.47	-0.24	FALSE	0	0.31	-0.02	0.08	0
TCGA-P5-A77X-01	FALSE	FALSE	0.31	-0.54	0.69	-0.48	-0.08	0.21	FALSE	-0.22	0.31	0.06	-0.07	0.06
TCGA-DB-5275-01	FALSE	FALSE	0.3	0.09	0.42	-0.07	-0.28	-0.18	FALSE	-0.14	0.3	0.06	0.03	-0.05
TCGA-S9-A6WE-01	FALSE	FALSE	0.3	-0.59	0.66	-0.34	-0.5	0.14	FALSE	-0.71	0.3	0	0	0.04
TCGA-DB-A4XD-01	FALSE	FALSE	0.29	-0.64	0.49	-0.54	-0.43	-0.46	FALSE	-1.09	0.29	-0.01	0.02	0.04
TCGA-CS-6668-01	FALSE	FALSE	0.28	-0.58	0.51	-0.43	-0.63	-0.55	FALSE	-0.98	0.28	0.06	-0.06	0.03
TCGA-HW-8322-01	FALSE	FALSE	0.28	0.08	0.44	-0.01	-0.76	-0.22	FALSE	-0.77	0.28	0.05	-0.05	0.04
TCGA-DU-5872-01	FALSE	FALSE	0.27	1.45	0.59	0.84	0.94	0.56	TRUE	0.27	-0.59	-0.03	0	-0.05
TCGA-HW-A5KJ-01	FALSE	FALSE	0.27	-0.09	0.73	0.45	0.01	0.72	TRUE	0.27	0.15	0.1	-0.09	0.01
TCGA-E1-A7YQ-01	FALSE	FALSE	0.27	2.25	0.22	1.16	1.21	0.27	TRUE	0.27	0.16	0.01	0.11	-0.1
TCGA-DH-5144-01	FALSE	FALSE	0.27	-0.18	0.65	-0.01	-0.42	-0.25	FALSE	-1.18	0.27	0.05	-0.05	0.03
TCGA-DU-A5TP-01	FALSE	FALSE	0.26	0.94	0.39	1	2.57	0.54	TRUE	0.26	-0.91	-0.03	0.02	-0.13
TCGA-DU-5854-01	FALSE	FALSE	0.26	0.55	0.17	0.67	0.64	0.79	FALSE	0.38	0.26	-0.02	0.11	-0.05
TCGA-HT-7473-01	FALSE	FALSE	0.26	0.93	0.28	0.85	0.93	0.53	TRUE	0.26	-1.91	-0.22	0.01	-0.07
TCGA-WY-A859-01	FALSE	FALSE	0.25	-0.78	0.68	-0.66	-0.26	0.24	FALSE	0.66	0.25	0.04	-0.07	0.06
TCGA-HT-8114-01	FALSE	FALSE	0.25	1.15	0.42	0.69	0.79	0.37	TRUE	0.25	-0.37	-0.1	0.11	-0.06
TCGA-DB-A64U-01	FALSE	FALSE	0.25	-0.67	0.59	-0.48	-0.33	-0.61	FALSE	-0.74	0.25	0.03	-0.02	0.03
TCGA-DB-A4XH-01	FALSE	FALSE	0.25	-0.06	0.75	-0.17	-0.13	0.42	TRUE	0.25	-0.48	0.01	-0.09	0.02
TCGA-FG-A60K-01	FALSE	FALSE	0.25	-0.23	0.64	-0.24	-0.71	-0.45	FALSE	-0.88	0.25	0	0	0.02
TCGA-IK-8125-01	FALSE	FALSE	0.24	-0.19	0.6	-0.25	-0.03	-0.03	FALSE	-0.04	0.24	0.02	-0.04	0.05
TCGA-DH-A66F-01	FALSE	FALSE	0.24	-0.15	0.79	-0.2	-0.19	-0.17	FALSE	-0.74	0.24	0	0.02	0.01
TCGA-S9-A6WD-01	FALSE	FALSE	0.22	-0.25	0.74	-0.3	0.29	-0.21	FALSE	-0.53	0.22	0.07	-0.08	0.04
TCGA-TM-A84S-01	FALSE	FALSE	0.22	0.05	0.65	0.08	0.19	-0.08	FALSE	-0.09	0.22	-0.02	0.04	0.01
TCGA-DU-6399-01	FALSE	FALSE	0.22	0.27	0.33	0.34	-0.13	0	FALSE	-0.13	0.22	0.01	0.02	0.01
TCGA-DB-A64X-01	FALSE	FALSE	0.2	0.1	0.79	0.12	0.08	0.27	TRUE	0.2	0.4	0.05	-0.02	0.03
TCGA-P5-A77W-01	FALSE	FALSE	0.2	-0.23	0.5	-0.4	-0.43	-0.06	FALSE	-0.88	0.2	0.11	-0.12	0.04
TCGA-WH-A86K-01	FALSE	FALSE	0.19	0.31	0.57	0.32	-0.06	0.32	TRUE	0.19	-0.58	-0.03	-0.06	0.01
TCGA-HT-7695-01	FALSE	FALSE	0.19	-0.55	0.67	-0.56	-0.29	0.05	FALSE	0.11	0.19	0.01	-0.02	0.04
TCGA-DB-A64O-01	FALSE	FALSE	0.18	0.11	0.64	-0.03	0.21	-0.1	FALSE	0.41	0.18	-0.03	0.08	-0.01
TCGA-DU-6402-01	FALSE	FALSE	0.18	1.6	0.24	1.64	3.31	1.86	TRUE	0.18	1.11	0.06	0.16	-0.06
TCGA-W9-A837-01	FALSE	FALSE	0.18	-0.69	0.71	-0.59	-0.33	-0.14	FALSE	0	0.18	0	-0.01	0.04
TCGA-TM-A7C4-01	FALSE	FALSE	0.17	-0.5	0.58	-0.46	0.03	0.49	FALSE	0.32	0.17	0.02	-0.04	0.05
TCGA-DU-7298-01	FALSE	FALSE	0.17	-0.23	0.56	-0.32	-0.02	-0.44	FALSE	-0.84	0.17	0.07	-0.07	0.02
TCGA-HT-A61C-01	FALSE	FALSE	0.17	2.18	0.21	1.22	1.32	1.24	TRUE	0.17	1.23	0.17	0.07	-0.06
TCGA-HT-A5RB-01	FALSE	FALSE	0.17	-0.43	0.41	-0.46	-0.08	-0.01	FALSE	0.02	0.17	0.02	-0.06	0.07
TCGA-DU-A5TY-01	FALSE	FALSE	0.16	1.37	0.17	0.85	0.85	0.79	TRUE	0.16	-0.38	-0.06	0.06	-0.06
TCGA-QH-A65Z-01	FALSE	FALSE	0.16	-0.48	0.74	-0.18	0.06	-0.03	FALSE	-0.28	0.16	0.04	-0.05	0.03
TCGA-DU-A5TT-01	FALSE	FALSE	0.16	0.5	0.35	0.26	0.21	-0.22	FALSE	0.27	0.16	0.03	0.05	-0.06
TCGA-S9-A6U2-01	FALSE	FALSE	0.16	-0.16	0.49	-0.09	-0.37	-0.26	FALSE	-0.32	0.16	-0.05	0.1	-0.02
TCGA-DB-A4XF-01	FALSE	FALSE	0.15	0.29	0.39	0.2	1.01	-0.05	FALSE	0.12	0.15	0.02	0.05	-0.03
TCGA-FG-7638-01	FALSE	FALSE	0.15	0.31	0.7	0.25	-0.11	0.3	TRUE	0.15	0.46	0.04	0.01	0.03
TCGA-DU-A7TC-01	FALSE	FALSE	0.15	-0.26	0.85	-0.22	-0.09	0.47	FALSE	0.77	0.15	0.06	-0.1	0.06
TCGA-FG-7636-01	FALSE	FALSE	0.15	0.03	0.56	-0.04	-0.57	-0.17	FALSE	0.01	0.15	0.02	-0.04	0.03
TCGA-S9-A7R1-01	FALSE	FALSE	0.14	0.03	0.74	-0.23	0.12	0.07	FALSE	-0.07	0.14	0.03	0.01	-0.01
TCGA-DU-6408-01	FALSE	FALSE	0.14	0.19	0.53	0.12	0.41	-0.21	FALSE	0.11	0.14	0.03	0.01	-0.02
TCGA-FG-7641-01	FALSE	FALSE	0.14	-1.07	0.69	-0.84	-0.5	-0.14	FALSE	-0.27	0.14	0.02	-0.04	0.04
TCGA-CS-6670-01	FALSE	FALSE	0.14	-0.48	0.68	-0.38	-0.25	0.15	FALSE	0.42	0.14	0.04	-0.01	0
TCGA-VW-A8FI-01	FALSE	FALSE	0.14	1.47	0.36	0.67	0.84	0.54	TRUE	0.14	0.18	0.07	0.01	-0.07
TCGA-R8-A6MO-01	FALSE	FALSE	0.14	-0.21	0.58	0.03	-0.8	0.34	TRUE	0.14	-0.26	0.01	-0.04	-0.01
TCGA-S9-A7IQ-01	FALSE	FALSE	0.13	-0.87	0.8	-0.64	0	0.54	FALSE	0.88	0.13	0.01	-0.03	0.04
TCGA-TQ-A7RV-01	FALSE	FALSE	0.13	-0.48	0.5	-0.43	-0.6	-0.11	FALSE	0.01	0.13	0.01	-0.06	0.08
TCGA-TQ-A7RF-01	FALSE	FALSE	0.13	-0.05	0.7	0.07	0.79	-0.05	FALSE	-0.45	0.13	0.02	0.01	-0.01
TCGA-HW-7493-01	FALSE	FALSE	0.13	0.73	0.62	0.36	0.83	0.5	TRUE	0.13	-0.45	-0.08	0.07	-0.05
TCGA-CS-4944-01	FALSE	FALSE	0.12	0.42	0.85	0.67	0.76	1.16	TRUE	0.12	0.16	-0.04	0.06	0
TCGA-E1-A7YM-01	FALSE	FALSE	0.12	-0.37	0.63	-0.29	-0.29	-0.11	FALSE	0.11	0.12	0.03	-0.01	0
TCGA-E1-A7YJ-01	FALSE	FALSE	0.11	1.96	0.17	0.9	0.74	0.63	FALSE	0.14	0.11	0.04	0.06	-0.1
TCGA-HT-7603-01	FALSE	FALSE	0.11	-0.63	0.94	-0.56	0.51	0.54	FALSE	-0.24	0.11	0	-0.04	0.05
TCGA-HT-7877-01	FALSE	FALSE	0.11	-0.79	0.6	-0.55	-0.49	0.04	FALSE	0.18	0.11	0.02	-0.01	0.02
TCGA-HT-7860-01	FALSE	FALSE	0.1	1.98	0.17	0.78	2.25	0.03	TRUE	0.1	-0.14	-0.03	0.1	-0.09
TCGA-DB-5274-01	FALSE	FALSE	0.1	0.89	0.87	1.05	-0.13	0.63	TRUE	0.1	0.35	0.08	-0.07	0.04
TCGA-DU-A7TD-01	FALSE	FALSE	0.1	2.53	0.1	1.09	1.27	0.34	TRUE	0.1	-0.04	0.03	0.06	-0.1
TCGA-P5-A735-01	FALSE	FALSE	0.1	-0.79	0.53	-0.5	-0.21	-0.21	FALSE	0.33	0.1	0.03	-0.09	0.06
TCGA-S9-A89Z-01	FALSE	FALSE	0.08	1.22	0.31	0.96	-0.23	0.35	TRUE	0.08	0.37	0	0.08	-0.02
TCGA-S9-A7R7-01	FALSE	FALSE	0.07	1.05	0.2	0.93	0.43	0.37	FALSE	0.27	0.07	-0.1	0.17	-0.05
TCGA-HT-7481-01	FALSE	FALSE	0.07	-0.53	0.66	-0.38	-0.68	0.1	FALSE	-0.23	0.07	0.04	-0.08	0.05
TCGA-HT-A614-01	FALSE	FALSE	0.07	-0.34	0.5	-0.19	-0.36	-0.27	FALSE	-0.01	0.07	-0.01	-0.02	0.03
TCGA-VM-A8CD-01	FALSE	FALSE	0.06	2.37	0.67	0.96	2.22	0.13	FALSE	0.32	0.06	0.03	0.11	-0.13
TCGA-DB-A4X9-01	FALSE	FALSE	0.06	-0.87	0.48	-0.6	-0.22	-0.53	FALSE	0.03	0.06	0	-0.01	0.03
TCGA-HT-A616-01	FALSE	FALSE	0.06	-0.44	0.79	-0.34	-0.08	0.39	FALSE	0.32	0.06	0.01	-0.01	0.01
TCGA-TM-A84R-01	FALSE	FALSE	0.04	-0.44	0.81	-0.51	0.29	0.57	FALSE	0.69	0.04	-0.01	-0.03	0.05
TCGA-QH-A6CZ-01	FALSE	FALSE	0.03	-0.69	0.72	-0.5	-0.26	0.08	FALSE	-0.29	0.03	0.02	-0.07	0.05
TCGA-CS-6186-01	FALSE	FALSE	0.03	1.22	0.33	0.17	0.53	-0.6	FALSE	-0.45	0.03	0.02	0.01	-0.03
TCGA-DU-6542-01	FALSE	FALSE	0.03	0.59	0.25	0.3	0.67	-0.44	FALSE	0.2	0.03	-0.02	0.05	-0.02
TCGA-QH-A6X5-01	FALSE	FALSE	0.03	-0.09	0.7	-0.12	-0.3	-0.12	FALSE	0.21	0.03	0.01	-0.03	0.02
TCGA-DU-7301-01	FALSE	FALSE	0.02	0.55	0.56	0.5	0.51	-0.28	FALSE	-0.69	0.02	-0.02	0.05	-0.02
TCGA-FG-A4MY-01	FALSE	FALSE	0.02	-0.08	0.51	-0.12	-0.13	0.14	FALSE	0.17	0.02	0	0.03	-0.03
TCGA-RY-A845-01	FALSE	FALSE	0.02	-0.56	0.51	-0.56	-0.18	-0.46	FALSE	-0.1	0.02	-0.01	-0.03	0.05
TCGA-DH-A7UU-01	FALSE	FALSE	0.01	-0.4	0.35	-0.26	-0.19	-0.33	FALSE	-0.34	0.01	0.06	-0.09	0.04
TCGA-DU-A7TB-01	FALSE	FALSE	0.01	-0.13	0.52	-0.33	-0.57	-0.12	FALSE	-0.03	0.01	-0.01	-0.03	0.04
TCGA-DU-5847-01	FALSE	FALSE	0.01	1.15	0.39	0.93	0.6	0.52	TRUE	0.01	0.15	0.04	0.05	-0.07
TCGA-E1-A7YE-01	FALSE	TRUE	0	0.08	0.23	0.33	-0.1	-0.31	FALSE	0.26	0	-0.02	0.08	-0.06
TCGA-DU-A7TA-01	FALSE	TRUE	0	1.06	0.25	0.5	-0.69	-0.5	FALSE	-0.04	0	0.02	0.01	-0.02
TCGA-HT-7873-01	FALSE	TRUE	-0.01	-1.31	0.3	-0.78	-0.04	-0.94	FALSE	-0.77	-0.01	-0.03	0	0.03
TCGA-P5-A5F6-01	FALSE	TRUE	-0.01	0.23	0.91	0.46	-0.15	0.57	TRUE	-0.01	-0.19	-0.02	0.01	-0.01
TCGA-P5-A5F1-01	FALSE	TRUE	-0.01	1.17	0.85	0.63	0.21	0.68	TRUE	-0.01	-0.12	-0.03	0.05	-0.04
TCGA-HW-8319-01	FALSE	TRUE	-0.01	-0.52	0.36	-0.53	0.2	-0.27	FALSE	-0.04	-0.01	0.02	-0.02	0.01
TCGA-DU-6403-01	FALSE	TRUE	-0.01	1.21	0.19	0.25	-0.13	-0.12	FALSE	0.47	-0.01	0.07	-0.02	-0.05
TCGA-FG-5962-01	FALSE	TRUE	-0.02	0.22	0.59	-0.1	0.23	0.28	FALSE	0.63	-0.02	0.01	0	0
TCGA-HT-7881-01	FALSE	TRUE	-0.02	-0.63	0.69	-0.49	-0.3	0.29	FALSE	0.41	-0.02	-0.01	-0.01	0.03
TCGA-DU-7290-01	FALSE	TRUE	-0.03	0.96	0.38	0.89	0.86	0.68	TRUE	-0.03	-0.55	-0.04	0.04	-0.07
TCGA-DH-5141-01	FALSE	TRUE	-0.03	0.5	0.85	0.49	-0.08	0.2	FALSE	0.14	-0.03	-0.01	0.03	-0.02
TCGA-HT-7688-01	FALSE	TRUE	-0.04	-0.35	0.72	-0.44	0.08	0.24	FALSE	0.18	-0.04	0.02	-0.05	0.02
TCGA-E1-A7YU-01	FALSE	TRUE	-0.04	-0.63	0.58	-0.23	-0.3	-0.06	FALSE	0.8	-0.04	-0.01	-0.06	0.06
TCGA-S9-A6U1-01	FALSE	TRUE	-0.05	-0.73	0.41	-0.35	0.15	-0.38	FALSE	-0.57	-0.05	0.02	-0.05	0.02
TCGA-FG-A713-01	FALSE	TRUE	-0.06	-0.36	0.69	-0.33	-0.25	0.46	FALSE	1.19	-0.06	-0.01	-0.02	0.02
TCGA-FG-6692-01	FALSE	TRUE	-0.06	2.07	0.28	1.21	0.17	1.16	TRUE	-0.06	0.83	0.09	0.09	-0.06
TCGA-HT-7884-01	FALSE	TRUE	-0.07	-1.09	0.41	-0.69	-0.69	-0.37	FALSE	-0.09	-0.07	-0.02	-0.03	0.04
TCGA-HT-7691-01	FALSE	TRUE	-0.09	0.41	0.74	0.29	0.96	0.33	TRUE	-0.09	-0.02	-0.08	0.15	-0.07
TCGA-FG-A711-01	FALSE	TRUE	-0.09	-0.42	0.78	-0.37	-0.39	-0.11	FALSE	0.29	-0.09	0.02	-0.1	0.05
TCGA-HT-7858-01	FALSE	TRUE	-0.09	0.85	0.38	0.58	0.05	0.39	TRUE	-0.09	-1.35	-0.11	-0.05	-0.04
TCGA-DU-6400-01	FALSE	TRUE	-0.1	0.36	0.58	0.1	-0.03	0.07	FALSE	0.3	-0.1	0.05	-0.06	0
TCGA-S9-A6WH-01	FALSE	TRUE	-0.1	-0.59	0.7	-0.53	-0.38	-0.35	FALSE	-0.17	-0.1	0.06	-0.11	0.03
TCGA-DB-A75M-01	FALSE	TRUE	-0.1	-0.21	0.48	0.08	-0.29	-0.19	FALSE	0.53	-0.1	-0.04	0.02	0.01
TCGA-HT-7879-01	FALSE	TRUE	-0.1	-0.53	0.2	-0.31	-0.37	-0.63	FALSE	0.16	-0.1	-0.05	0.01	0.02
TCGA-P5-A737-01	FALSE	TRUE	-0.1	-0.08	0.54	-0.03	-0.08	0.19	FALSE	0.63	-0.1	0.03	-0.08	0.03
TCGA-TM-A7CA-01	FALSE	TRUE	-0.1	-0.55	0.46	-0.43	-0.45	-0.1	FALSE	-0.02	-0.1	0.02	-0.11	0.08
TCGA-DB-A75L-01	FALSE	TRUE	-0.1	-0.37	0.55	-0.37	-0.21	-0.17	FALSE	0.27	-0.1	0.02	-0.08	0.05
TCGA-QH-A65V-01	FALSE	TRUE	-0.11	-0.11	0.85	-0.31	-0.38	-0.26	FALSE	-0.01	-0.11	-0.02	-0.01	0
TCGA-HW-7489-01	FALSE	TRUE	-0.11	-0.29	0.7	-0.34	0.12	0.22	FALSE	0.94	-0.11	-0.01	-0.03	0.03
TCGA-DU-A5TU-01	FALSE	TRUE	-0.11	0.69	0.43	0.5	-0.04	-0.12	FALSE	0.79	-0.11	-0.04	0.03	-0.01
TCGA-E1-A7YW-01	FALSE	TRUE	-0.12	-0.64	0.46	-0.51	-0.23	-0.54	FALSE	-0.22	-0.12	-0.03	0.03	-0.01
TCGA-HT-7692-01	FALSE	TRUE	-0.12	-0.01	0.57	-0.02	-0.33	0.12	FALSE	-0.23	-0.12	0.04	-0.08	0.02
TCGA-TQ-A7RG-01	FALSE	TRUE	-0.12	-0.09	0.55	-0.12	-0.49	0.14	FALSE	-0.28	-0.12	-0.04	0.02	0.01
TCGA-DB-5279-01	FALSE	TRUE	-0.13	0.06	0.73	0.28	0.14	0.73	TRUE	-0.13	-0.21	-0.03	0.02	-0.01
TCGA-DH-5142-01	FALSE	TRUE	-0.13	1.49	0.43	1.1	-0.22	0.12	FALSE	-0.03	-0.13	-0.03	0.03	-0.03
TCGA-S9-A7QY-01	FALSE	TRUE	-0.14	-0.27	0.6	-0.2	-0.56	0.04	FALSE	0.68	-0.14	0.02	-0.07	0.03
TCGA-P5-A781-01	FALSE	TRUE	-0.15	-0.2	0.64	-0.25	-0.02	0.09	FALSE	-0.13	-0.15	-0.02	-0.05	0.04
TCGA-TM-A84H-01	FALSE	TRUE	-0.15	-0.77	0.31	-0.5	-0.17	-0.43	FALSE	-0.22	-0.15	0.01	-0.05	0.01
TCGA-TQ-A7RI-01	FALSE	TRUE	-0.15	-0.5	0.38	-0.27	-0.26	-0.1	FALSE	0.17	-0.15	-0.04	0.02	0.01
TCGA-HT-7687-01	FALSE	TRUE	-0.16	0.18	0.43	0.27	-0.09	0.19	FALSE	0.14	-0.16	0.01	-0.03	0.01
TCGA-QH-A870-01	FALSE	TRUE	-0.17	-0.32	0.73	-0.21	0.5	-0.28	FALSE	-0.74	-0.17	-0.03	0	0
TCGA-HT-7694-01	FALSE	TRUE	-0.17	-0.69	0.77	-0.55	0.27	0.32	FALSE	0.43	-0.17	-0.01	-0.04	0.03
TCGA-QH-A6X4-01	FALSE	TRUE	-0.17	-0.61	0.44	-0.38	-0.82	-0.34	FALSE	0.4	-0.17	0.03	-0.11	0.05
TCGA-CS-4938-01	FALSE	TRUE	-0.18	-0.13	0.62	0.11	0.55	0.05	FALSE	-0.41	-0.18	-0.06	0.03	0.01
TCGA-S9-A6TV-01	FALSE	TRUE	-0.18	2.52	0.53	1.46	2.74	-0.31	FALSE	0.21	-0.18	-0.03	0.12	-0.12
TCGA-DH-A66B-01	FALSE	TRUE	-0.18	1.22	0.41	0.93	0.38	0.26	TRUE	-0.18	-0.15	-0.02	0.02	-0.03
TCGA-FG-8189-01	FALSE	TRUE	-0.19	-0.42	0.81	-0.61	0.2	0.71	FALSE	0.72	-0.19	-0.01	-0.05	0.04
TCGA-QH-A6X3-01	FALSE	TRUE	-0.19	0.18	0.65	0.15	0.02	-0.13	FALSE	-1.25	-0.19	0	-0.03	0.01
TCGA-DH-A66G-01	FALSE	TRUE	-0.19	0.43	0.36	0.29	1.15	0.24	FALSE	0.73	-0.19	-0.04	0.09	-0.07
TCGA-P5-A5EV-01	FALSE	TRUE	-0.19	0.81	0.63	0.33	-0.07	0.13	FALSE	-0.2	-0.19	-0.01	-0.07	0.05
TCGA-HT-7855-01	FALSE	TRUE	-0.19	-0.18	0.46	-0.17	-0.44	-0.39	FALSE	-0.67	-0.19	0	-0.04	0.01
TCGA-TQ-A7RO-01	FALSE	TRUE	-0.2	-0.04	0.45	-0.04	-0.71	0.2	TRUE	-0.2	0.22	0.01	0.04	-0.01
TCGA-HT-7689-01	FALSE	TRUE	-0.2	0.37	0.59	-0.08	0.35	-0.53	FALSE	-0.66	-0.2	-0.05	0.03	-0.01
TCGA-P5-A5F2-01	FALSE	TRUE	-0.21	-0.57	0.67	-0.51	0.38	-0.16	FALSE	0.34	-0.21	-0.01	-0.01	-0.01
TCGA-FG-5965-01	FALSE	TRUE	-0.21	0.41	0.52	0.2	-0.69	0.09	FALSE	0.57	-0.21	-0.02	0.08	-0.09
TCGA-TM-A7CF-01	FALSE	TRUE	-0.21	-0.34	0.52	-0.47	0.06	0.43	FALSE	1.04	-0.21	0	-0.07	0.04
TCGA-E1-A7Z3-01	FALSE	TRUE	-0.21	-0.11	0.5	-0.04	0.39	0.16	FALSE	1.53	-0.21	-0.04	0.03	-0.01
TCGA-P5-A733-01	FALSE	TRUE	-0.21	-0.17	0.86	-0.07	0.86	0.44	TRUE	-0.21	-0.35	-0.03	-0.02	0.01
TCGA-S9-A6TS-01	FALSE	TRUE	-0.23	-0.08	0.41	-0.06	-0.06	-0.29	FALSE	0.77	-0.23	-0.03	-0.04	0.03
TCGA-HT-A5R7-01	FALSE	TRUE	-0.23	0.02	0.7	-0.21	-0.15	0.18	FALSE	1	-0.23	0	-0.03	0
TCGA-HT-7874-01	FALSE	TRUE	-0.25	-0.62	0.72	-0.49	0.04	0.14	FALSE	0.57	-0.25	-0.03	-0.02	0.02
TCGA-VM-A8C8-01	FALSE	TRUE	-0.25	-0.36	0.79	-0.19	-0.16	-0.22	FALSE	-0.08	-0.25	-0.05	-0.03	0.04
TCGA-HT-8012-01	FALSE	TRUE	-0.25	-0.59	0.46	-0.37	-0.31	-0.46	FALSE	0.39	-0.25	-0.01	-0.05	0.02
TCGA-DU-8162-01	FALSE	TRUE	-0.25	-0.16	0.57	-0.28	0.82	0.41	FALSE	0.55	-0.25	-0.02	0.01	-0.01
TCGA-HT-7470-01	FALSE	TRUE	-0.26	-0.28	0.47	-0.33	-0.21	0.16	FALSE	0.53	-0.26	-0.05	0	0.02
TCGA-DB-5270-01	FALSE	TRUE	-0.26	1.05	0.6	0.39	0.37	0.76	FALSE	1.23	-0.26	-0.05	0.03	-0.02
TCGA-HW-8320-01	FALSE	TRUE	-0.27	-0.13	0.47	-0.07	0.11	-0.5	FALSE	-0.39	-0.27	-0.03	0.01	-0.01
TCGA-HT-7676-01	FALSE	TRUE	-0.27	-0.04	0.53	0.24	0.35	0.19	TRUE	-0.27	-1	-0.09	-0.08	0.02
TCGA-HT-7856-01	FALSE	TRUE	-0.27	-0.54	0.63	-0.48	0.16	0.4	FALSE	1.12	-0.27	-0.02	-0.04	0.03
TCGA-HT-A74L-01	FALSE	TRUE	-0.28	-0.38	0.5	-0.44	0.01	-0.58	FALSE	-0.6	-0.28	0	-0.03	-0.01
TCGA-E1-5319-01	FALSE	TRUE	-0.28	0.31	0.62	0.13	-0.3	0.1	TRUE	-0.28	-0.02	-0.04	0.07	-0.02
TCGA-HT-7607-01	FALSE	TRUE	-0.28	0.42	0.69	-0.05	0.29	0.36	FALSE	0.72	-0.28	-0.04	0.01	0
TCGA-QH-A6X9-01	FALSE	TRUE	-0.28	-0.73	0.54	-0.51	-0.05	-0.27	FALSE	-0.27	-0.28	0.02	-0.09	0.03
TCGA-HT-8105-01	FALSE	TRUE	-0.29	-0.63	0.61	-0.34	0.06	-0.3	FALSE	-0.17	-0.29	0.03	-0.04	-0.03
TCGA-DU-7019-01	FALSE	TRUE	-0.3	0.88	0.58	0.44	0.37	0.2	TRUE	-0.3	-0.11	-0.06	0.1	-0.05
TCGA-FG-A60J-01	FALSE	TRUE	-0.3	0.3	0.6	0.2	0.09	-0.11	FALSE	0.59	-0.3	-0.04	0.03	-0.03
TCGA-HT-A61A-01	FALSE	TRUE	-0.3	-0.4	0.77	-0.43	-0.53	0.87	FALSE	0.85	-0.3	-0.03	-0.05	0.05
TCGA-HT-7605-01	FALSE	TRUE	-0.31	-0.02	0.72	-0.18	0.37	0.33	FALSE	0.48	-0.31	-0.05	-0.01	0.02
TCGA-HW-7487-01	FALSE	TRUE	-0.31	-0.36	0.77	-0.4	0.12	-0.05	FALSE	0.22	-0.31	-0.01	-0.07	0.04
TCGA-DU-7309-01	FALSE	TRUE	-0.31	-0.08	0.58	-0.17	0.3	0.36	FALSE	0.96	-0.31	-0.04	0	0
TCGA-HT-7467-01	FALSE	TRUE	-0.31	0.12	0.56	-0.16	-0.21	0.32	FALSE	0.66	-0.31	-0.01	-0.05	0.01
TCGA-QH-A6CY-01	FALSE	TRUE	-0.31	-0.16	0.79	-0.19	-0.1	0.25	FALSE	0.27	-0.31	-0.02	-0.06	0.03
TCGA-TM-A84Q-01	FALSE	TRUE	-0.32	0.39	0.53	0.39	-0.59	-0.08	FALSE	-0.31	-0.32	-0.05	0	-0.01
TCGA-DU-6401-01	FALSE	TRUE	-0.32	0.95	0.42	0.26	0.1	0.12	FALSE	0.01	-0.32	-0.01	0.05	-0.08
TCGA-E1-5302-01	FALSE	TRUE	-0.33	0.32	0.54	0.36	-0.05	-0.05	FALSE	0.39	-0.33	-0.06	0.06	-0.05
TCGA-HT-7610-01	FALSE	TRUE	-0.33	-0.76	0.59	-0.64	-0.04	0.16	FALSE	0.33	-0.33	-0.03	-0.06	0.04
TCGA-S9-A7J1-01	FALSE	TRUE	-0.34	0.04	0.47	-0.13	-0.16	-0.25	FALSE	0.01	-0.34	-0.05	0	0.01
TCGA-HT-A74J-01	FALSE	TRUE	-0.34	-0.36	0.43	-0.24	-0.03	-0.16	FALSE	1.3	-0.34	-0.02	-0.03	0.01
TCGA-QH-A6CS-01	FALSE	TRUE	-0.35	0.22	0.77	0.22	1.18	-0.17	FALSE	0.28	-0.35	-0.07	0.04	-0.02
TCGA-HT-8558-01	FALSE	TRUE	-0.35	-0.49	0.83	-0.64	0.08	0.7	FALSE	0.62	-0.35	-0.02	-0.05	0.03
TCGA-DU-7014-01	FALSE	TRUE	-0.35	0.1	0.55	0.07	0.03	0.24	TRUE	-0.35	0.17	0.02	-0.03	0.03
TCGA-QH-A6X8-01	FALSE	TRUE	-0.35	-0.6	0.51	-0.29	-0.12	-0.39	FALSE	0.59	-0.35	0.01	-0.07	0.01
TCGA-DU-6395-01	FALSE	TRUE	-0.36	-0.17	0.6	-0.04	0.61	0.13	FALSE	0.49	-0.36	-0.02	0.01	-0.04
TCGA-TM-A84T-01	FALSE	TRUE	-0.36	-0.42	0.41	-0.14	-0.15	-0.26	FALSE	-0.36	-0.36	-0.04	-0.07	0.06
TCGA-HT-7611-01	FALSE	TRUE	-0.37	0.14	0.36	0.12	0.9	-0.04	FALSE	-0.39	-0.37	-0.09	0.05	-0.01
TCGA-HT-8019-01	FALSE	TRUE	-0.37	-0.35	0.85	-0.4	0.33	0.96	FALSE	1.08	-0.37	-0.02	-0.06	0.03
TCGA-HW-7490-01	FALSE	TRUE	-0.37	0.98	0.7	0.55	0.75	0.06	FALSE	-0.14	-0.37	-0.02	0.07	-0.1
TCGA-HT-7680-01	FALSE	TRUE	-0.38	0.32	0.87	0.49	0.75	0.58	FALSE	-0.31	-0.38	-0.09	0.1	-0.06
TCGA-HT-7472-01	FALSE	TRUE	-0.38	0.5	0.39	0.51	0.39	0.01	FALSE	-0.47	-0.38	-0.08	0.02	0
TCGA-S9-A7IZ-01	FALSE	TRUE	-0.39	0.2	0.48	0.21	0.14	-0.01	FALSE	0.97	-0.39	-0.07	0.03	-0.01
TCGA-E1-A7YY-01	FALSE	TRUE	-0.4	0.72	0.75	-0.16	0.53	0.52	FALSE	1.03	-0.4	-0.02	-0.05	0.02
TCGA-DH-A7UT-01	FALSE	TRUE	-0.4	-0.34	0.43	-0.32	-0.22	-0.29	FALSE	0.76	-0.4	-0.05	-0.01	0
TCGA-S9-A6WI-01	FALSE	TRUE	-0.4	-0.26	0.86	-0.33	0.36	0.96	FALSE	0.99	-0.4	-0.01	-0.06	0.02
TCGA-HT-7693-01	FALSE	TRUE	-0.42	0.03	0.44	0.17	0.26	-0.08	FALSE	-0.7	-0.42	-0.02	0	-0.05
TCGA-S9-A6U6-01	FALSE	TRUE	-0.42	-0.3	0.61	-0.33	0.04	-0.15	FALSE	0.56	-0.42	0	-0.05	-0.01
TCGA-RY-A843-01	FALSE	TRUE	-0.42	-0.11	0.7	-0.12	-0.29	-0.02	FALSE	0.42	-0.42	-0.01	-0.06	0.01
TCGA-E1-5322-01	FALSE	TRUE	-0.43	0.47	0.4	0.25	-0.2	-0.37	FALSE	-0.29	-0.43	-0.03	-0.03	-0.02
TCGA-S9-A7R8-01	FALSE	TRUE	-0.43	-0.19	0.33	-0.11	-0.2	-0.63	FALSE	-0.26	-0.43	0	-0.06	0
TCGA-E1-A7Z6-01	FALSE	TRUE	-0.43	-0.41	0.64	-0.29	0.86	-0.34	FALSE	-0.02	-0.43	-0.08	0.05	-0.03
TCGA-WY-A85C-01	FALSE	TRUE	-0.44	-0.09	0.45	0.04	0.03	0.06	FALSE	-0.08	-0.44	0	-0.06	-0.01
TCGA-HT-7608-01	FALSE	TRUE	-0.44	0.26	0.78	0.26	0.24	0.08	FALSE	0.27	-0.44	-0.09	0.06	-0.03
TCGA-DU-7306-01	FALSE	TRUE	-0.44	0.94	0.72	0.51	1.29	0	FALSE	-0.37	-0.44	-0.04	0.05	-0.07
TCGA-FG-8188-01	FALSE	TRUE	-0.44	-0.51	0.44	-0.36	0.29	-0.47	FALSE	-0.51	-0.44	-0.05	0	-0.01
TCGA-CS-6667-01	FALSE	TRUE	-0.45	-0.4	0.6	-0.19	0.07	-0.09	FALSE	-0.25	-0.45	-0.03	-0.03	0
TCGA-S9-A6WM-01	FALSE	TRUE	-0.46	0.35	0.29	0.49	1.51	0.18	TRUE	-0.46	1.54	0.11	0.14	-0.02
TCGA-E1-A7YH-01	FALSE	TRUE	-0.46	-0.46	0.6	-0.43	-0.25	-0.36	FALSE	0.08	-0.46	-0.04	-0.02	0
TCGA-WY-A85A-01	FALSE	TRUE	-0.47	0.34	0.53	0.01	-0.03	-0.15	FALSE	-0.03	-0.47	-0.03	-0.08	0.03
TCGA-DU-7007-01	FALSE	TRUE	-0.47	1.45	0.28	1.35	0.26	1.01	TRUE	-0.47	0.57	-0.02	0.15	-0.05
TCGA-FG-6688-01	FALSE	TRUE	-0.48	0.9	0.54	0.67	0.75	-0.03	FALSE	0.46	-0.48	-0.06	0.07	-0.08
TCGA-DH-5143-01	FALSE	TRUE	-0.48	0.23	0.63	0.1	0.55	-0.08	FALSE	0.65	-0.48	-0.06	0	-0.01
TCGA-QH-A6XA-01	FALSE	TRUE	-0.49	-0.53	0.56	-0.38	0.07	-0.17	FALSE	-0.34	-0.49	-0.05	-0.05	0.04
TCGA-P5-A780-01	FALSE	TRUE	-0.49	0.18	0.34	0.07	-0.29	0.08	FALSE	0.24	-0.49	-0.03	-0.01	-0.02
TCGA-HT-7485-01	FALSE	TRUE	-0.49	-0.01	0.6	0.1	1.04	-0.31	FALSE	-0.62	-0.49	-0.1	0.02	0.01
TCGA-QH-A6CW-01	FALSE	TRUE	-0.5	-0.39	0.35	0.01	-0.16	-0.24	FALSE	0.53	-0.5	-0.02	0.01	-0.07
TCGA-DU-5855-01	FALSE	TRUE	-0.51	0.12	0.35	0.24	0.32	-0.11	FALSE	0.47	-0.51	-0.05	0.04	-0.06
TCGA-S9-A7QX-01	FALSE	TRUE	-0.51	-0.24	0.5	-0.08	-0.04	-0.13	FALSE	-0.28	-0.51	0	-0.14	0.05
TCGA-DU-A6S2-01	FALSE	TRUE	-0.52	-0.89	0.56	-0.43	0.02	0.21	FALSE	0.93	-0.52	-0.01	-0.02	-0.04
TCGA-QH-A65S-01	FALSE	TRUE	-0.53	-0.22	0.62	-0.09	0.14	0	FALSE	0.19	-0.53	-0.06	-0.03	0.01
TCGA-HT-A5R9-01	FALSE	TRUE	-0.53	-0.43	0.48	-0.17	-0.64	0.31	TRUE	-0.53	0.97	0.15	-0.06	0.05
TCGA-P5-A5EW-01	FALSE	TRUE	-0.54	-0.58	0.54	-0.18	1.23	-0.15	FALSE	-0.42	-0.54	-0.08	0.03	-0.02
TCGA-CS-6669-01	FALSE	TRUE	-0.54	-0.34	0.84	-0.45	-0.04	1.04	FALSE	0.83	-0.54	-0.04	-0.08	0.04
TCGA-HT-A61B-01	FALSE	TRUE	-0.55	1.19	0.44	0.85	-0.32	-0.4	FALSE	0.12	-0.55	0.01	-0.05	-0.06
TCGA-DB-A75K-01	FALSE	TRUE	-0.56	0.55	0.41	0.22	0.5	-0.54	FALSE	1.69	-0.56	0.02	0.02	-0.12
TCGA-KT-A7W1-01	FALSE	TRUE	-0.56	2.32	0.25	0.79	0.94	0.91	TRUE	-0.56	1.3	0.18	0.08	-0.07
TCGA-VM-A8CH-01	FALSE	TRUE	-0.59	0.25	0.43	0.38	-0.06	-0.14	FALSE	-0.2	-0.59	-0.07	0.01	-0.02
TCGA-E1-5307-01	FALSE	TRUE	-0.6	-0.31	0.54	-0.42	0.07	-0.27	FALSE	-0.37	-0.6	-0.05	-0.06	0.03
TCGA-TM-A84B-01	FALSE	TRUE	-0.61	0.74	0.41	0.45	-0.35	0.55	TRUE	-0.61	1.07	0.1	0.07	-0.01
TCGA-TM-A7C5-01	FALSE	TRUE	-0.61	0.03	0.57	-0.09	-0.41	0.26	TRUE	-0.61	0.19	0.08	-0.1	0.04
TCGA-HW-8321-01	FALSE	TRUE	-0.61	0.27	0.43	-0.04	0.13	-0.2	FALSE	0.13	-0.61	-0.07	0.04	-0.05
TCGA-HT-7482-01	FALSE	TRUE	-0.62	-0.27	0.65	-0.21	0.77	-0.39	FALSE	-0.69	-0.62	-0.1	0.03	-0.02
TCGA-QH-A6CU-01	FALSE	TRUE	-0.62	0.33	0.86	0.17	-0.01	0.1	FALSE	0.44	-0.62	-0.07	0.01	-0.03
TCGA-S9-A6TZ-01	FALSE	TRUE	-0.63	0.4	0.38	-0.03	-0.03	-0.23	FALSE	-0.12	-0.63	-0.07	0.02	-0.05
TCGA-DU-8166-01	FALSE	TRUE	-0.64	0.04	0.44	-0.35	0.84	-0.31	FALSE	-0.3	-0.64	-0.03	0.02	-0.07
TCGA-DU-A7TG-01	FALSE	TRUE	-0.65	-0.11	0.74	-0.3	0.23	0.54	FALSE	1.09	-0.65	-0.05	-0.02	-0.02
TCGA-HT-8010-01	FALSE	TRUE	-0.65	-0.07	0.72	0.09	0.21	0.5	FALSE	1.15	-0.65	-0.09	0	0
TCGA-E1-A7YD-01	FALSE	TRUE	-0.67	0.6	0.26	0.06	-0.39	0.2	TRUE	-0.67	0.96	0.13	0.04	-0.03
TCGA-WY-A85B-01	FALSE	TRUE	-0.7	0.16	0.39	0.3	-0.21	-0.06	FALSE	-0.33	-0.7	-0.03	-0.11	0.03
TCGA-FG-A710-01	FALSE	TRUE	-0.71	1.58	0.5	0.79	0.49	-0.21	FALSE	1.32	-0.71	-0.03	-0.01	-0.07
TCGA-DH-A66D-01	FALSE	TRUE	-0.71	0.12	0.28	0.22	0.08	-0.27	FALSE	0.5	-0.71	-0.07	-0.01	-0.03
TCGA-DU-A5TS-01	FALSE	TRUE	-0.71	0.01	0.7	0	-0.02	0.25	FALSE	0.64	-0.71	-0.02	-0.13	0.04
TCGA-S9-A7R4-01	FALSE	TRUE	-0.72	0.2	0.27	0.07	0.2	-0.19	FALSE	0.26	-0.72	-0.08	0.04	-0.05
TCGA-WY-A85D-01	FALSE	TRUE	-0.72	-0.48	0.62	-0.27	-0.09	-0.23	FALSE	-0.16	-0.72	-0.07	-0.05	0.01
TCGA-DU-A6S7-01	FALSE	TRUE	-0.73	-0.99	0.34	-0.42	0.69	-0.53	FALSE	0.42	-0.73	-0.04	-0.08	0.01
TCGA-FG-A87Q-01	FALSE	TRUE	-0.73	2.53	0.56	1.09	2.09	0.49	FALSE	0.82	-0.73	-0.06	0.05	-0.09
TCGA-TQ-A7RW-01	FALSE	TRUE	-0.74	0.49	0.31	0.27	-0.01	-0.17	FALSE	-0.05	-0.74	-0.08	-0.02	-0.01
TCGA-HT-8109-01	FALSE	TRUE	-0.76	-0.1	0.63	-0.19	0.19	0.42	FALSE	0.37	-0.76	-0.07	-0.05	0.01
TCGA-HT-8111-01	FALSE	TRUE	-0.77	0.66	0.53	0.44	-0.27	0	FALSE	0.19	-0.77	-0.1	-0.01	0
TCGA-HT-8107-01	FALSE	TRUE	-0.8	-0.12	0.76	-0.41	0.8	0.65	FALSE	0.88	-0.8	-0.05	-0.05	-0.01
TCGA-TQ-A7RR-01	FALSE	TRUE	-0.81	-0.27	0.36	-0.18	0	-0.25	FALSE	0.6	-0.81	-0.09	-0.02	0
TCGA-FG-A70Y-01	FALSE	TRUE	-0.82	-0.21	0.61	-0.08	-0.27	-0.07	FALSE	0.59	-0.82	-0.13	-0.03	0.03
TCGA-DB-A64S-01	FALSE	TRUE	-0.82	0.18	0.53	0.31	-0.32	-0.13	FALSE	-0.04	-0.82	-0.09	-0.01	-0.03
TCGA-FG-8191-01	FALSE	TRUE	-0.82	0.24	0.63	0.22	0.89	0.17	FALSE	-0.58	-0.82	-0.09	0.07	-0.1
TCGA-HW-7486-01	FALSE	TRUE	-0.83	0.17	0.58	0.01	0.07	-0.1	FALSE	0.17	-0.83	-0.08	-0.04	0
TCGA-HT-7609-01	FALSE	TRUE	-0.83	0.15	0.55	0.05	0.27	-0.3	FALSE	-0.41	-0.83	-0.08	-0.02	-0.03
TCGA-S9-A7R3-01	FALSE	TRUE	-0.85	-0.07	0.58	0.18	0.67	-0.06	FALSE	0.03	-0.85	-0.09	-0.01	-0.02
TCGA-DB-A75O-01	FALSE	TRUE	-0.86	0.42	0.36	0.21	0	-0.15	FALSE	1.54	-0.86	-0.08	0	-0.05
TCGA-DB-A4XC-01	FALSE	TRUE	-0.86	0.01	0.41	-0.03	-0.59	0.04	FALSE	0.8	-0.86	-0.07	-0.01	-0.04
TCGA-HT-7686-01	FALSE	TRUE	-0.89	0.63	0.44	0.75	0.54	0.37	FALSE	0.4	-0.89	-0.13	0.05	-0.06
TCGA-TQ-A7RJ-01	FALSE	TRUE	-0.92	-0.4	0.47	-0.12	0.17	-0.32	FALSE	0.66	-0.92	-0.09	-0.06	0.02
TCGA-FG-8187-01	FALSE	TRUE	-0.93	0.14	0.67	-0.13	0.33	0.07	FALSE	0.07	-0.93	-0.08	-0.02	-0.03
TCGA-HT-A5R5-01	FALSE	TRUE	-0.93	0.89	0.61	0.66	1.57	0.02	FALSE	1.41	-0.93	-0.09	0.11	-0.15
TCGA-VV-A86M-01	FALSE	TRUE	-0.94	0.5	0.42	0.41	-0.05	0.1	TRUE	-0.94	-0.29	0.02	-0.08	0.02
TCGA-DU-7299-01	FALSE	TRUE	-0.95	-0.06	0.32	-0.02	-0.07	-0.32	FALSE	-0.46	-0.95	-0.08	-0.07	0.01
TCGA-HT-7602-01	FALSE	TRUE	-0.95	0.2	0.67	0.05	0.2	-0.01	FALSE	0.03	-0.95	-0.11	-0.02	-0.01
TCGA-S9-A6WQ-01	FALSE	TRUE	-0.98	0.2	0.53	0.17	-0.04	0.01	FALSE	1.06	-0.98	-0.11	-0.05	0.01
TCGA-TM-A84L-01	FALSE	TRUE	-0.99	-0.28	0.42	0.08	0.62	0.17	FALSE	1.02	-0.99	-0.14	0.01	-0.01
TCGA-S9-A7J3-01	FALSE	TRUE	-1.01	-0.02	0.48	-0.27	-0.27	-0.43	FALSE	0.42	-1.01	-0.07	-0.03	-0.05
TCGA-DU-A76O-01	FALSE	TRUE	-1.01	0.13	0.46	0.22	-0.84	-0.24	FALSE	1.3	-1.01	-0.07	-0.13	0.04
TCGA-DU-5871-01	FALSE	TRUE	-1.04	0.18	0.58	-0.03	0.44	-0.23	FALSE	0.23	-1.04	-0.11	-0.01	-0.03
TCGA-E1-A7Z4-01	FALSE	TRUE	-1.04	0.33	0.56	0.05	-0.01	-0.24	FALSE	0.16	-1.04	-0.1	-0.05	-0.02
TCGA-S9-A7R2-01	FALSE	TRUE	-1.07	0.72	0.44	1.07	0.6	1.59	FALSE	0.93	-1.07	-0.11	0	-0.04
TCGA-FG-8186-01	FALSE	TRUE	-1.07	1.17	0.59	0.41	0.48	-0.08	FALSE	0.51	-1.07	-0.08	0.02	-0.11
TCGA-DU-7015-01	FALSE	TRUE	-1.07	1.01	0.4	0.64	0.67	0.33	FALSE	-0.33	-1.07	-0.08	-0.06	-0.02
TCGA-DH-A7UV-01	FALSE	TRUE	-1.08	-0.61	0.44	-0.28	-0.07	-0.3	FALSE	0.39	-1.08	-0.1	-0.08	0.02
TCGA-HW-A5KK-01	FALSE	TRUE	-1.09	0.25	0.27	0.64	1.07	0.66	FALSE	1.04	-1.09	-0.12	0.04	-0.07
TCGA-VM-A8CF-01	FALSE	TRUE	-1.12	0.51	0.75	0.88	0.47	0.29	FALSE	0.8	-1.12	-0.11	-0.06	0
TCGA-HT-7620-01	FALSE	TRUE	-1.13	-0.3	0.57	-0.06	0.02	-0.09	FALSE	-0.13	-1.13	-0.08	-0.1	0.01
TCGA-HW-A5KL-01	FALSE	TRUE	-1.13	-0.32	0.44	-0.11	-0.05	0.1	FALSE	0.22	-1.13	-0.09	-0.12	0.04
TCGA-E1-5303-01	FALSE	TRUE	-1.13	0.06	0.61	0.18	0.06	-0.11	FALSE	0.25	-1.13	-0.13	-0.02	-0.02
TCGA-S9-A6U8-01	FALSE	TRUE	-1.14	-0.48	0.36	-0.22	0.43	-0.48	FALSE	0.42	-1.14	-0.15	-0.02	0
TCGA-DU-7304-01	FALSE	TRUE	-1.15	-0.14	0.48	0.02	0.45	-0.06	FALSE	0.74	-1.15	-0.1	-0.06	-0.01
TCGA-FG-6690-01	FALSE	TRUE	-1.18	-0.04	0.46	0.11	0.06	0.08	FALSE	0.11	-1.18	-0.14	-0.02	-0.01
TCGA-FG-6689-01	FALSE	TRUE	-1.18	-0.13	0.56	0.04	0.31	0.11	FALSE	0.96	-1.18	-0.14	-0.03	0
TCGA-HT-7479-01	FALSE	TRUE	-1.18	0.04	0.65	0.25	0.7	0.13	FALSE	0.07	-1.18	-0.14	0	-0.02
TCGA-DB-A64L-01	FALSE	TRUE	-1.18	0.23	0.75	0.3	0.07	0.29	FALSE	0.36	-1.18	-0.03	-0.11	-0.04
TCGA-DU-8163-01	FALSE	TRUE	-1.18	-0.1	0.26	0.15	0.43	-0.1	FALSE	0.41	-1.18	-0.13	-0.04	0
TCGA-RY-A847-01	FALSE	TRUE	-1.19	0.39	0.63	0.17	-0.15	0.22	FALSE	1.16	-1.19	-0.09	-0.1	0.01
TCGA-FG-6691-01	FALSE	TRUE	-1.2	0.05	0.32	0.12	0.33	-0.41	FALSE	-0.1	-1.2	-0.13	0	-0.03
TCGA-S9-A6TU-01	FALSE	TRUE	-1.23	0.02	0.34	0.3	0.29	0.01	FALSE	1.2	-1.23	-0.09	-0.07	-0.02
TCGA-HT-8013-01	FALSE	TRUE	-1.23	0.62	0.3	0.11	-0.39	-0.59	FALSE	0.31	-1.23	-0.09	-0.06	-0.04
TCGA-DU-8167-01	FALSE	TRUE	-1.24	0.72	0.54	0.36	0.38	-0.02	FALSE	0.38	-1.24	-0.08	-0.07	-0.04
TCGA-HT-7854-01	FALSE	TRUE	-1.25	0.58	0.59	0.26	0.99	0.18	FALSE	0.44	-1.25	-0.15	0.08	-0.11
TCGA-TQ-A7RH-01	FALSE	TRUE	-1.26	0.01	0.31	0.19	0.45	-0.14	FALSE	1.01	-1.26	-0.11	-0.08	0
TCGA-S9-A6WO-01	FALSE	TRUE	-1.29	-0.3	0.45	-0.19	0.3	-0.35	FALSE	-0.22	-1.29	-0.09	-0.11	0.01
TCGA-FG-8182-01	FALSE	TRUE	-1.38	-0.61	0.33	-0.45	0.07	-0.27	FALSE	-0.25	-1.38	-0.12	-0.09	0
TCGA-CS-4942-01	FALSE	TRUE	-1.43	1.13	0.53	0.88	0.59	-0.2	FALSE	0.46	-1.43	-0.11	-0.06	-0.05
TCGA-DU-A7TI-01	FALSE	TRUE	-1.5	1.12	0.52	0.39	1.19	-0.35	FALSE	0.81	-1.5	-0.06	0.01	-0.17
TCGA-HT-8108-01	FALSE	TRUE	-1.55	0.78	0.33	0.26	-0.07	-0.4	FALSE	-0.1	-1.55	-0.09	-0.12	-0.03
TCGA-HT-A615-01	FALSE	TRUE	-1.59	0.7	0.61	0.64	1.04	0.25	FALSE	0.17	-1.59	-0.13	-0.1	-0.01
TCGA-FN-7833-01	FALSE	TRUE	-1.62	1.59	0.5	0.76	1.78	-0.51	FALSE	0.39	-1.62	-0.09	-0.01	-0.15
TCGA-CS-5393-01	FALSE	TRUE	-1.69	-0.16	0.39	-0.06	0.02	0.09	FALSE	0.64	-1.69	-0.16	-0.12	0.04
TCGA-CS-6290-01	FALSE	TRUE	-2.08	1.17	0.51	0.86	0.75	0.53	FALSE	0.92	-2.08	-0.2	-0.04	-0.08
TCGA-HW-A5KM-01	FALSE	TRUE	-2.14	2.93	0.32	1.86	1.85	0.07	FALSE	0.57	-2.14	-0.19	-0.01	-0.12
