# Supplementary material for: PDZ Binding Kinase/T-LAK Cell-Derived Protein Kinase Plays an Oncogenic Role and Promotes Immune Escape in Human Tumors
Source: J Oncol. 2021 Sep 23;2021:8892479. doi: 10.1155/2021/8892479 (PMC8486520; doi:10.1155/2021/8892479)
Supplement: Supplementary Materials — Table S1: expression comparison of PBK/TOPK expression in tumor and normal tissues across cancers from TCGA and GTEx. Table S2: the correlation of PBK/TOPK expression with immune cells in TIMER2.0. Table S3: the correlation of PBK/TOPK expression with TMB across cancers from TCGA. Table S4: the correlation of PBK/TOPK expression with MSI across cancers from TCGA. Table S5: the correlation of PBK/TOPK expression with the expression of immune checkpoints genes across cancers from TCGA. Table S6: analysis of the correlation between PBK/TOPK expression and the immune response based on TIDE in KRIC, LGG, and LIHC. Table S7: the correlations of PBK/TOPK with DNA mismatch genes and methyltransferases. Table S8: similar genes of PBK/TOPK from GEPIA2. Table S9: the correlation of PBK/TOPK with top 5 similar genes from GEPIA2. Table S10: the result of Venn. Table S11: the GO and KEGG enrichment analysis of PBK/TOPK-related differentially genes in KIRC. Table S12: the GO and KEGG enrichment analysis of PBK/TOPK-related differentially genes in LGG. Table S13: the GO and KEGG enrichment analysis of PBK/TOPK-related differentially genes in LIHC. Table S14: Gene_outcome of PBK in the TIMER2.0 database. Figure S1: PBK mRNA expression based on the pathological stage and tumor grade of other cancers in TCGA. Click the link to download the supplements: (https://pan.baidu.com/s/1GFqYHhkAK0Y_34zLnH049g) (password 1234). [file 8892479.f1.zip › 8892479.f1/Table S7.txt]

Tumor	correlated gene	Spearman correlation	p value	pstar
ACC	MLH1	0.501	<0.001	***
ACC	MSH2	0.768	<0.001	***
ACC	MSH6	0.607	<0.001	***
ACC	PMS2	0.234	0.038	*
ACC	DNMT1	0.766	<0.001	***
ACC	DNMT3A	0.592	<0.001	***
ACC	DNMT3B	0.423	<0.001	***
ACC	DNMT3L	-0.069	0.548
BLCA	MLH1	0.389	<0.001	***
BLCA	MSH2	0.476	<0.001	***
BLCA	MSH6	0.550	<0.001	***
BLCA	PMS2	0.353	<0.001	***
BLCA	DNMT1	0.600	<0.001	***
BLCA	DNMT3A	0.124	0.012	*
BLCA	DNMT3B	0.154	0.002	**
BLCA	DNMT3L	0.038	0.437
BRCA	MLH1	0.123	<0.001	***
BRCA	MSH2	0.561	<0.001	***
BRCA	MSH6	0.560	<0.001	***
BRCA	PMS2	0.196	<0.001	***
BRCA	DNMT1	0.450	<0.001	***
BRCA	DNMT3A	0.297	<0.001	***
BRCA	DNMT3B	0.447	<0.001	***
BRCA	DNMT3L	0.132	<0.001	***
CESE	MLH1	0.306	<0.001	***
CESE	MSH2	0.493	<0.001	***
CESE	MSH6	0.439	<0.001	***
CESE	PMS2	0.313	<0.001	***
CESE	DNMT1	0.479	<0.001	***
CESE	DNMT3A	0.308	<0.001	***
CESE	DNMT3B	0.258	<0.001	***
CESE	DNMT3L	0.027	0.632
CHOL	MLH1	-0.027	0.876
CHOL	MSH2	0.191	0.264
CHOL	MSH6	0.138	0.420
CHOL	PMS2	0.086	0.618
CHOL	DNMT1	0.170	0.321
CHOL	DNMT3A	0.035	0.839
CHOL	DNMT3B	0.211	0.216
CHOL	DNMT3L	-0.329	0.050
COAD	MLH1	0.116	0.011	*
COAD	MSH2	0.467	<0.001	***
COAD	MSH6	0.435	<0.001	***
COAD	PMS2	0.100	0.028	*
COAD	DNMT1	0.276	<0.001	***
COAD	DNMT3A	-0.199	<0.001	***
COAD	DNMT3B	0.019	0.680
COAD	DNMT3L	-0.139	0.002	**
DLBC	MLH1	0.675	<0.001	***
DLBC	MSH2	0.598	<0.001	***
DLBC	MSH6	0.304	0.036	*
DLBC	PMS2	0.478	<0.001	***
DLBC	DNMT1	0.532	<0.001	***
DLBC	DNMT3A	-0.053	0.722
DLBC	DNMT3B	0.421	0.003	**
DLBC	DNMT3L	-0.459	0.001	**
ESCA	MLH1	0.462	<0.001	***
ESCA	MSH2	0.663	<0.001	***
ESCA	MSH6	0.558	<0.001	***
ESCA	PMS2	0.384	<0.001	***
ESCA	DNMT1	0.560	<0.001	***
ESCA	DNMT3A	0.342	<0.001	***
ESCA	DNMT3B	0.421	<0.001	***
ESCA	DNMT3L	0.115	0.145
GBM	MLH1	0.519	<0.001	***
GBM	MSH2	0.512	<0.001	***
GBM	MSH6	0.445	<0.001	***
GBM	PMS2	0.275	<0.001	***
GBM	DNMT1	0.417	<0.001	***
GBM	DNMT3A	0.259	<0.001	***
GBM	DNMT3B	0.482	<0.001	***
GBM	DNMT3L	0.029	0.706
HNSC	MLH1	0.497	<0.001	***
HNSC	MSH2	0.632	<0.001	***
HNSC	MSH6	0.644	<0.001	***
HNSC	PMS2	0.248	<0.001	***
HNSC	DNMT1	0.549	<0.001	***
HNSC	DNMT3A	0.360	<0.001	***
HNSC	DNMT3B	0.073	0.100
HNSC	DNMT3L	0.231	<0.001	***
KICH	MLH1	0.455	<0.001	***
KICH	MSH2	0.362	0.003	**
KICH	MSH6	0.388	0.002	**
KICH	PMS2	0.291	0.019	*
KICH	DNMT1	0.383	0.002	**
KICH	DNMT3A	0.308	0.013	*
KICH	DNMT3B	0.256	0.040	*
KICH	DNMT3L	0.126	0.318
KIRC	MLH1	0.095	0.027	*
KIRC	MSH2	0.181	<0.001	***
KIRC	MSH6	0.241	<0.001	***
KIRC	PMS2	0.032	0.458
KIRC	DNMT1	0.232	<0.001	***
KIRC	DNMT3A	0.082	0.057
KIRC	DNMT3B	0.148	<0.001	***
KIRC	DNMT3L	0.130	0.002	**
KIRP	MLH1	0.168	0.004	**
KIRP	MSH2	0.396	<0.001	***
KIRP	MSH6	0.434	<0.001	***
KIRP	PMS2	0.156	0.008	**
KIRP	DNMT1	0.431	<0.001	***
KIRP	DNMT3A	0.149	0.011	*
KIRP	DNMT3B	0.300	<0.001	***
KIRP	DNMT3L	0.054	0.358
LAML	MLH1	0.401	<0.001	***
LAML	MSH2	0.168	0.039	*
LAML	MSH6	0.255	0.002	**
LAML	PMS2	0.003	0.968
LAML	DNMT1	0.319	<0.001	***
LAML	DNMT3A	-0.099	0.225
LAML	DNMT3B	0.008	0.920
LAML	DNMT3L	0.113	0.168
LGG	MLH1	0.514	<0.001	***
LGG	MSH2	0.489	<0.001	***
LGG	MSH6	0.574	<0.001	***
LGG	PMS2	0.323	<0.001	***
LGG	DNMT1	0.654	<0.001	***
LGG	DNMT3A	0.361	<0.001	***
LGG	DNMT3B	0.497	<0.001	***
LGG	DNMT3L	0.051	0.242
LIHC	MLH1	0.529	<0.001	***
LIHC	MSH2	0.726	<0.001	***
LIHC	MSH6	0.675	<0.001	***
LIHC	PMS2	0.424	<0.001	***
LIHC	DNMT1	0.736	<0.001	***
LIHC	DNMT3A	0.522	<0.001	***
LIHC	DNMT3B	0.614	<0.001	***
LIHC	DNMT3L	-0.062	0.232
LUAD	MLH1	0.106	0.014	*
LUAD	MSH2	0.528	<0.001	***
LUAD	MSH6	0.458	<0.001	***
LUAD	PMS2	0.209	<0.001	***
LUAD	DNMT1	0.256	<0.001	***
LUAD	DNMT3A	0.319	<0.001	***
LUAD	DNMT3B	0.499	<0.001	***
LUAD	DNMT3L	0.165	<0.001	***
LUSC	MLH1	0.198	<0.001	***
LUSC	MSH2	0.426	<0.001	***
LUSC	MSH6	0.445	<0.001	***
LUSC	PMS2	0.247	<0.001	***
LUSC	DNMT1	0.331	<0.001	***
LUSC	DNMT3A	0.156	<0.001	***
LUSC	DNMT3B	0.302	<0.001	***
LUSC	DNMT3L	0.102	0.022	*
MESO	MLH1	0.308	0.004	**
MESO	MSH2	0.573	<0.001	***
MESO	MSH6	0.536	<0.001	***
MESO	PMS2	0.294	0.006	**
MESO	DNMT1	0.646	<0.001	***
MESO	DNMT3A	0.386	<0.001	***
MESO	DNMT3B	0.576	<0.001	***
MESO	DNMT3L	-0.029	0.792
OV	MLH1	0.241	<0.001	***
OV	MSH2	0.303	<0.001	***
OV	MSH6	0.252	<0.001	***
OV	PMS2	-0.010	0.852
OV	DNMT1	0.197	<0.001	***
OV	DNMT3A	0.019	0.712
OV	DNMT3B	0.312	<0.001	***
OV	DNMT3L	0.009	0.863
PAAD	MLH1	0.155	0.039	*
PAAD	MSH2	0.476	<0.001	***
PAAD	MSH6	0.345	<0.001	***
PAAD	PMS2	0.248	<0.001	***
PAAD	DNMT1	0.335	<0.001	***
PAAD	DNMT3A	-0.000	1.000
PAAD	DNMT3B	0.198	0.008	**
PAAD	DNMT3L	-0.010	0.893
PCPG	MLH1	0.292	<0.001	***
PCPG	MSH2	0.309	<0.001	***
PCPG	MSH6	0.326	<0.001	***
PCPG	PMS2	0.349	<0.001	***
PCPG	DNMT1	0.445	<0.001	***
PCPG	DNMT3A	0.254	<0.001	***
PCPG	DNMT3B	0.258	<0.001	***
PCPG	DNMT3L	-0.021	0.778
PRAD	MLH1	0.344	<0.001	***
PRAD	MSH2	0.468	<0.001	***
PRAD	MSH6	0.434	<0.001	***
PRAD	PMS2	0.331	<0.001	***
PRAD	DNMT1	0.461	<0.001	***
PRAD	DNMT3A	0.348	<0.001	***
PRAD	DNMT3B	0.409	<0.001	***
PRAD	DNMT3L	0.005	0.904
READ	MLH1	0.435	<0.001	***
READ	MSH2	0.516	<0.001	***
READ	MSH6	0.539	<0.001	***
READ	PMS2	0.266	<0.001	***
READ	DNMT1	0.248	0.001	**
READ	DNMT3A	0.123	0.113
READ	DNMT3B	0.245	0.001	**
READ	DNMT3L	0.036	0.64
SARC	MLH1	0.406	<0.001	***
SARC	MSH2	0.514	<0.001	***
SARC	MSH6	0.430	<0.001	***
SARC	PMS2	0.202	0.001	**
SARC	DNMT1	0.618	<0.001	***
SARC	DNMT3A	0.071	0.248
SARC	DNMT3B	0.514	<0.001	***
SARC	DNMT3L	0.119	0.053
SKCM	MLH1	0.401	<0.001	***
SKCM	MSH2	0.583	<0.001	***
SKCM	MSH6	0.529	<0.001	***
SKCM	PMS2	0.406	<0.001	***
SKCM	DNMT1	0.491	<0.001	***
SKCM	DNMT3A	0.329	<0.001	***
SKCM	DNMT3B	0.373	<0.001	***
SKCM	DNMT3L	0.013	0.782
STAD	MLH1	-0.075	0.147
STAD	MSH2	0.568	<0.001	***
STAD	MSH6	0.400	<0.001	***
STAD	PMS2	0.246	<0.001	***
STAD	DNMT1	0.488	<0.001	***
STAD	DNMT3A	-0.029	0.581
STAD	DNMT3B	0.359	<0.001	***
STAD	DNMT3L	0.015	0.777
TGCT	MLH1	0.347	<0.001	***
TGCT	MSH2	0.585	<0.001	***
TGCT	MSH6	0.424	<0.001	***
TGCT	PMS2	0.566	<0.001	***
TGCT	DNMT1	0.266	<0.001	***
TGCT	DNMT3A	0.011	0.896
TGCT	DNMT3B	-0.050	0.536
TGCT	DNMT3L	-0.035	0.665
THCA	MLH1	0.200	<0.001	***
THCA	MSH2	0.246	<0.001	***
THCA	MSH6	0.320	<0.001	***
THCA	PMS2	0.178	<0.001	***
THCA	DNMT1	0.403	<0.001	***
THCA	DNMT3A	0.249	<0.001	***
THCA	DNMT3B	0.125	0.005	**
THCA	DNMT3L	0.090	0.042	*
THYM	MLH1	0.601	<0.001	***
THYM	MSH2	0.642	<0.001	***
THYM	MSH6	0.735	<0.001	***
THYM	PMS2	-0.105	0.257
THYM	DNMT1	0.536	<0.001	***
THYM	DNMT3A	0.592	<0.001	***
THYM	DNMT3B	0.801	<0.001	***
THYM	DNMT3L	-0.220	0.016	*
UCEC	MLH1	0.115	0.007	**
UCEC	MSH2	0.610	<0.001	***
UCEC	MSH6	0.550	<0.001	***
UCEC	PMS2	0.479	<0.001	***
UCEC	DNMT1	0.461	<0.001	***
UCEC	DNMT3A	0.330	<0.001	***
UCEC	DNMT3B	0.534	<0.001	***
UCEC	DNMT3L	0.052	0.224
UCS	MLH1	-0.080	0.555
UCS	MSH2	0.084	0.539
UCS	MSH6	0.002	0.989
UCS	PMS2	0.084	0.539
UCS	DNMT1	0.253	0.060
UCS	DNMT3A	-0.392	0.003	**
UCS	DNMT3B	-0.129	0.343
UCS	DNMT3L	-0.269	0.045	*
UVM	MLH1	0.376	<0.001	***
UVM	MSH2	0.622	<0.001	***
UVM	MSH6	0.691	<0.001	***
UVM	PMS2	0.537	<0.001	***
UVM	DNMT1	0.534	<0.001	***
UVM	DNMT3A	0.548	<0.001	***
UVM	DNMT3B	0.586	<0.001	***
UVM	DNMT3L	0.155	0.170
