# Supplementary material for: PDZ Binding Kinase/T-LAK Cell-Derived Protein Kinase Plays an Oncogenic Role and Promotes Immune Escape in Human Tumors
Source: J Oncol. 2021 Sep 23;2021:8892479. doi: 10.1155/2021/8892479 (PMC8486520; doi:10.1155/2021/8892479)
Supplement: Supplementary Materials — Table S1: expression comparison of PBK/TOPK expression in tumor and normal tissues across cancers from TCGA and GTEx. Table S2: the correlation of PBK/TOPK expression with immune cells in TIMER2.0. Table S3: the correlation of PBK/TOPK expression with TMB across cancers from TCGA. Table S4: the correlation of PBK/TOPK expression with MSI across cancers from TCGA. Table S5: the correlation of PBK/TOPK expression with the expression of immune checkpoints genes across cancers from TCGA. Table S6: analysis of the correlation between PBK/TOPK expression and the immune response based on TIDE in KRIC, LGG, and LIHC. Table S7: the correlations of PBK/TOPK with DNA mismatch genes and methyltransferases. Table S8: similar genes of PBK/TOPK from GEPIA2. Table S9: the correlation of PBK/TOPK with top 5 similar genes from GEPIA2. Table S10: the result of Venn. Table S11: the GO and KEGG enrichment analysis of PBK/TOPK-related differentially genes in KIRC. Table S12: the GO and KEGG enrichment analysis of PBK/TOPK-related differentially genes in LGG. Table S13: the GO and KEGG enrichment analysis of PBK/TOPK-related differentially genes in LIHC. Table S14: Gene_outcome of PBK in the TIMER2.0 database. Figure S1: PBK mRNA expression based on the pathological stage and tumor grade of other cancers in TCGA. Click the link to download the supplements: (https://pan.baidu.com/s/1GFqYHhkAK0Y_34zLnH049g) (password 1234). [file 8892479.f1.zip › 8892479.f1/Table S8.txt]

Gene Symbol	Gene ID	PCC
ESCO2	ENSG00000171320.14	0.74
KIF4A	ENSG00000090889.11	0.7
RACGAP1	ENSG00000161800.12	0.69
NUSAP1	ENSG00000137804.12	0.68
MAD2L1	ENSG00000164109.13	0.68
NCAPG	ENSG00000109805.9	0.67
CCNB1	ENSG00000134057.14	0.67
GTSE1	ENSG00000075218.18	0.66
CCNA2	ENSG00000145386.9	0.66
SKA1	ENSG00000154839.9	0.66
UBE2T	ENSG00000077152.9	0.66
KIF11	ENSG00000138160.5	0.66
BUB1	ENSG00000169679.14	0.65
PRC1	ENSG00000198901.13	0.65
CCNB2	ENSG00000157456.7	0.65
SPC25	ENSG00000152253.8	0.65
NCAPH	ENSG00000121152.9	0.64
CDK1	ENSG00000170312.15	0.64
KIF23	ENSG00000137807.13	0.64
TPX2	ENSG00000088325.15	0.64
BIRC5	ENSG00000089685.14	0.64
KIF2C	ENSG00000142945.12	0.64
CENPF	ENSG00000117724.12	0.64
SGOL1	ENSG00000129810.14	0.64
KIFC1	ENSG00000237649.7	0.64
CDCA5	ENSG00000146670.9	0.63
CDC25C	ENSG00000158402.18	0.63
NUF2	ENSG00000143228.12	0.63
CDKN3	ENSG00000100526.19	0.63
DLGAP5	ENSG00000126787.12	0.63
CKAP2L	ENSG00000169607.12	0.62
NCAPG2	ENSG00000146918.19	0.62
EXO1	ENSG00000174371.16	0.62
PLK1	ENSG00000166851.14	0.62
FAM64A	ENSG00000129195.15	0.62
HMMR	ENSG00000072571.19	0.62
MELK	ENSG00000165304.7	0.61
DEPDC1	ENSG00000024526.16	0.61
TUBA1B	ENSG00000123416.15	0.61
GINS1	ENSG00000101003.9	0.61
CENPI	ENSG00000102384.13	0.61
NEK2	ENSG00000117650.12	0.61
KIF20A	ENSG00000112984.11	0.61
ASPM	ENSG00000066279.16	0.61
KIF15	ENSG00000163808.16	0.61
ZWINT	ENSG00000122952.16	0.61
KIF14	ENSG00000118193.11	0.61
FBXO5	ENSG00000112029.9	0.61
CKS2	ENSG00000123975.4	0.61
KIF18A	ENSG00000121621.6	0.6
HJURP	ENSG00000123485.11	0.6
CENPL	ENSG00000120334.15	0.6
TTK	ENSG00000112742.9	0.6
PLK4	ENSG00000142731.10	0.6
ARHGAP11A	ENSG00000198826.10	0.6
DBF4	ENSG00000006634.7	0.6
CENPE	ENSG00000138778.11	0.6
KPNA2	ENSG00000182481.8	0.6
FANCI	ENSG00000140525.17	0.6
SGOL2	ENSG00000163535.17	0.6
OIP5	ENSG00000104147.8	0.59
KIF18B	ENSG00000186185.13	0.59
AURKA	ENSG00000087586.17	0.59
CENPO	ENSG00000138092.10	0.59
NDC80	ENSG00000080986.12	0.59
EZH2	ENSG00000106462.10	0.59
CEP55	ENSG00000138180.15	0.59
POC1A	ENSG00000164087.7	0.59
MKI67	ENSG00000148773.12	0.59
RRM2	ENSG00000171848.13	0.58
DTL	ENSG00000143476.17	0.58
ZWILCH	ENSG00000174442.11	0.58
PARPBP	ENSG00000185480.11	0.58
FEN1	ENSG00000168496.3	0.58
PCNA	ENSG00000132646.10	0.58
INCENP	ENSG00000149503.12	0.58
DSCC1	ENSG00000136982.5	0.58
FOXM1	ENSG00000111206.12	0.58
UBE2S	ENSG00000108106.13	0.57
CENPA	ENSG00000115163.14	0.57
MND1	ENSG00000121211.7	0.57
CHEK1	ENSG00000149554.12	0.57
H2AFZ	ENSG00000164032.11	0.57
SHCBP1	ENSG00000171241.8	0.56
SKA3	ENSG00000165480.15	0.56
MCM10	ENSG00000065328.16	0.56
LMNB1	ENSG00000113368.11	0.56
CKAP2	ENSG00000136108.14	0.56
CDCA8	ENSG00000134690.10	0.56
GSG2	ENSG00000177602.5	0.56
SPDL1	ENSG00000040275.16	0.56
TMPO	ENSG00000120802.13	0.56
TROAP	ENSG00000135451.12	0.56
ORC6	ENSG00000091651.8	0.56
CDCA2	ENSG00000184661.13	0.56
RFC3	ENSG00000133119.12	0.56
LIN9	ENSG00000183814.15	0.56
KIAA1524	ENSG00000163507.13	0.56
TIMELESS	ENSG00000111602.11	0.56
MCM6	ENSG00000076003.4	0.55
