# Supplementary material for: PDZ Binding Kinase/T-LAK Cell-Derived Protein Kinase Plays an Oncogenic Role and Promotes Immune Escape in Human Tumors
Source: J Oncol. 2021 Sep 23;2021:8892479. doi: 10.1155/2021/8892479 (PMC8486520; doi:10.1155/2021/8892479)
Supplement: Supplementary Materials — Table S1: expression comparison of PBK/TOPK expression in tumor and normal tissues across cancers from TCGA and GTEx. Table S2: the correlation of PBK/TOPK expression with immune cells in TIMER2.0. Table S3: the correlation of PBK/TOPK expression with TMB across cancers from TCGA. Table S4: the correlation of PBK/TOPK expression with MSI across cancers from TCGA. Table S5: the correlation of PBK/TOPK expression with the expression of immune checkpoints genes across cancers from TCGA. Table S6: analysis of the correlation between PBK/TOPK expression and the immune response based on TIDE in KRIC, LGG, and LIHC. Table S7: the correlations of PBK/TOPK with DNA mismatch genes and methyltransferases. Table S8: similar genes of PBK/TOPK from GEPIA2. Table S9: the correlation of PBK/TOPK with top 5 similar genes from GEPIA2. Table S10: the result of Venn. Table S11: the GO and KEGG enrichment analysis of PBK/TOPK-related differentially genes in KIRC. Table S12: the GO and KEGG enrichment analysis of PBK/TOPK-related differentially genes in LGG. Table S13: the GO and KEGG enrichment analysis of PBK/TOPK-related differentially genes in LIHC. Table S14: Gene_outcome of PBK in the TIMER2.0 database. Figure S1: PBK mRNA expression based on the pathological stage and tumor grade of other cancers in TCGA. Click the link to download the supplements: (https://pan.baidu.com/s/1GFqYHhkAK0Y_34zLnH049g) (password 1234). [file 8892479.f1.zip › 8892479.f1/Table S9.txt]

cancer	infiltrates	rho	p	adj.p
ACC (n=79)	ESCO2	0.933276534	5.54E-36	9.72E-36
ACC (n=79)	KIF4A	0.926022395	2.57E-34	4.39E-34
ACC (n=79)	MAD2L1	0.730209348	2.24E-14	2.62E-14
ACC (n=79)	NUSAP1	0.61781889	1.32E-09	1.48E-09
ACC (n=79)	RACGAP1	0.899245375	2.26E-29	3.64E-29
BLCA (n=408)	ESCO2	0.854408911	1.69E-117	1.16E-116
BLCA (n=408)	KIF4A	0.663022979	5.24E-53	1.18E-52
BLCA (n=408)	MAD2L1	0.728785517	9.07E-69	2.84E-68
BLCA (n=408)	NUSAP1	0.716175048	2.12E-65	6.15E-65
BLCA (n=408)	RACGAP1	0.723805431	2.04E-67	6.10E-67
BRCA (n=1100)	ESCO2	0.85769487	1.71035645277323e-319	3.42071290554645e-317
BRCA (n=1100)	KIF4A	0.781166723	7.04E-227	3.52E-225
BRCA (n=1100)	MAD2L1	0.766453951	2.47E-213	8.23E-212
BRCA (n=1100)	NUSAP1	0.779782013	1.47E-225	5.87E-224
BRCA (n=1100)	RACGAP1	0.762601472	5.96E-210	1.70E-208
BRCA-Basal (n=191)	ESCO2	0.78787717	1.19E-41	2.21E-41
BRCA-Basal (n=191)	KIF4A	0.668584665	4.19E-26	6.07E-26
BRCA-Basal (n=191)	MAD2L1	0.550618283	1.56E-16	1.90E-16
BRCA-Basal (n=191)	NUSAP1	0.604643152	2.00E-20	2.55E-20
BRCA-Basal (n=191)	RACGAP1	0.530509438	2.94E-15	3.48E-15
BRCA-Her2 (n=82)	ESCO2	0.818308464	6.22E-21	8.08E-21
BRCA-Her2 (n=82)	KIF4A	0.549874294	8.76E-08	9.42E-08
BRCA-Her2 (n=82)	MAD2L1	0.472578662	7.37E-06	7.67E-06
BRCA-Her2 (n=82)	NUSAP1	0.570988561	2.13E-08	2.32E-08
BRCA-Her2 (n=82)	RACGAP1	0.655489165	2.35E-11	2.68E-11
BRCA-LumA (n=568)	ESCO2	0.879127052	2.57E-184	5.14E-183
BRCA-LumA (n=568)	KIF4A	0.776422826	1.39E-115	8.45E-115
BRCA-LumA (n=568)	MAD2L1	0.763493102	1.46E-109	7.88E-109
BRCA-LumA (n=568)	NUSAP1	0.768202242	1.04E-111	5.77E-111
BRCA-LumA (n=568)	RACGAP1	0.751476554	2.64E-104	1.29E-103
BRCA-LumB (n=219)	ESCO2	0.793847613	9.07E-49	1.89E-48
BRCA-LumB (n=219)	KIF4A	0.557289751	2.88E-19	3.55E-19
BRCA-LumB (n=219)	MAD2L1	0.546550207	1.86E-18	2.29E-18
BRCA-LumB (n=219)	NUSAP1	0.607336022	1.82E-23	2.49E-23
BRCA-LumB (n=219)	RACGAP1	0.580498589	3.99E-21	5.22E-21
CESC (n=306)	ESCO2	0.737861136	7.76E-54	1.83E-53
CESC (n=306)	KIF4A	0.564027612	4.25E-27	6.40E-27
CESC (n=306)	MAD2L1	0.563309195	5.10E-27	7.61E-27
CESC (n=306)	NUSAP1	0.526189826	3.43E-23	4.64E-23
CESC (n=306)	RACGAP1	0.594286953	1.33E-30	2.18E-30
CHOL (n=36)	ESCO2	0.758301158	8.45E-08	9.14E-08
CHOL (n=36)	KIF4A	0.734105534	3.48E-07	3.70E-07
CHOL (n=36)	MAD2L1	0.684684685	4.11E-06	4.31E-06
CHOL (n=36)	NUSAP1	0.567567568	0.000306104	0.000315571
CHOL (n=36)	RACGAP1	0.754954955	1.04E-07	1.11E-07
COAD (n=458)	ESCO2	0.923786193	3.15E-192	6.99E-191
COAD (n=458)	KIF4A	0.411934793	3.46E-20	4.39E-20
COAD (n=458)	MAD2L1	0.645055565	3.07E-55	7.49E-55
COAD (n=458)	NUSAP1	0.637981955	1.04E-53	2.43E-53
COAD (n=458)	RACGAP1	0.574890914	1.21E-41	2.24E-41
DLBC (n=48)	ESCO2	0.808510638	3.66E-12	4.21E-12
DLBC (n=48)	KIF4A	0.5040165	0.000259912	0.000269339
DLBC (n=48)	MAD2L1	0.830872775	2.72E-13	3.15E-13
DLBC (n=48)	NUSAP1	0.634824142	1.26E-06	1.33E-06
DLBC (n=48)	RACGAP1	0.655992184	4.16E-07	4.41E-07
ESCA (n=185)	ESCO2	0.881877109	1.17E-61	3.08E-61
ESCA (n=185)	KIF4A	0.673117016	9.09E-26	1.31E-25
ESCA (n=185)	MAD2L1	0.649891968	1.40E-23	1.93E-23
ESCA (n=185)	NUSAP1	0.704061635	5.20E-29	8.32E-29
ESCA (n=185)	RACGAP1	0.650115614	1.34E-23	1.85E-23
GBM (n=153)	ESCO2	0.883941136	1.04E-51	2.25E-51
GBM (n=153)	KIF4A	0.748575985	9.74E-29	1.53E-28
GBM (n=153)	MAD2L1	0.807094608	2.23E-36	3.99E-36
GBM (n=153)	NUSAP1	0.779317947	1.85E-32	3.13E-32
GBM (n=153)	RACGAP1	0.799291008	3.25E-35	5.65E-35
HNSC (n=522)	ESCO2	0.863417484	1.23E-156	1.90E-155
HNSC (n=522)	KIF4A	0.666740333	2.13E-68	6.55E-68
HNSC (n=522)	MAD2L1	0.73169348	1.33E-88	5.13E-88
HNSC (n=522)	NUSAP1	0.731758358	1.27E-88	4.96E-88
HNSC (n=522)	RACGAP1	0.703092645	5.00E-79	1.82E-78
HNSC-HPV- (n=422)	ESCO2	0.84390776	1.20E-115	7.49E-115
HNSC-HPV- (n=422)	KIF4A	0.624459603	5.24E-47	1.07E-46
HNSC-HPV- (n=422)	MAD2L1	0.702269773	5.77E-64	1.60E-63
HNSC-HPV- (n=422)	NUSAP1	0.680944556	8.59E-59	2.17E-58
HNSC-HPV- (n=422)	RACGAP1	0.673988323	3.37E-57	8.42E-57
HNSC-HPV+ (n=98)	ESCO2	0.816957711	1.11E-24	1.57E-24
HNSC-HPV+ (n=98)	KIF4A	0.596439888	9.15E-11	1.04E-10
HNSC-HPV+ (n=98)	MAD2L1	0.682267659	1.03E-14	1.21E-14
HNSC-HPV+ (n=98)	NUSAP1	0.665754962	7.47E-14	8.69E-14
HNSC-HPV+ (n=98)	RACGAP1	0.56131056	1.83E-09	2.03E-09
KICH (n=66)	ESCO2	0.863312807	1.13E-20	1.44E-20
KICH (n=66)	KIF4A	0.914747939	6.99E-27	1.04E-26
KICH (n=66)	MAD2L1	0.676025467	4.71E-10	5.32E-10
KICH (n=66)	NUSAP1	0.884354452	7.48E-23	9.98E-23
KICH (n=66)	RACGAP1	0.62133389	2.59E-08	2.82E-08
KIRC (n=533)	ESCO2	0.807393217	9.11E-124	7.59E-123
KIRC (n=533)	KIF4A	0.749186946	4.62E-97	1.97E-96
KIRC (n=533)	MAD2L1	0.719761992	3.28E-86	1.24E-85
KIRC (n=533)	NUSAP1	0.638260675	2.55E-62	6.79E-62
KIRC (n=533)	RACGAP1	0.630646171	1.89E-60	4.84E-60
KIRP (n=290)	ESCO2	0.832762126	6.28E-76	2.09E-75
KIRP (n=290)	KIF4A	0.876056775	3.17E-93	1.32E-92
KIRP (n=290)	MAD2L1	0.701072504	3.39E-44	6.40E-44
KIRP (n=290)	NUSAP1	0.763990469	9.66E-57	2.39E-56
KIRP (n=290)	RACGAP1	0.574123917	7.95E-27	1.17E-26
LGG (n=516)	ESCO2	0.949568604	4.75E-261	3.17E-259
LGG (n=516)	KIF4A	0.892221019	1.38E-179	2.29E-178
LGG (n=516)	MAD2L1	0.801012773	1.28E-116	8.55E-116
LGG (n=516)	NUSAP1	0.962589369	1.20E-293	1.20E-291
LGG (n=516)	RACGAP1	0.74379546	5.56E-92	2.27E-91
LIHC (n=371)	ESCO2	0.923933289	4.63E-156	6.62E-155
LIHC (n=371)	KIF4A	0.879413306	5.38E-121	4.30E-120
LIHC (n=371)	MAD2L1	0.843336537	1.47E-101	6.68E-101
LIHC (n=371)	NUSAP1	0.870682455	9.18E-116	5.92E-115
LIHC (n=371)	RACGAP1	0.84225085	4.72E-101	2.10E-100
LUAD (n=515)	ESCO2	0.897001648	5.12E-184	9.30E-183
LUAD (n=515)	KIF4A	0.774436632	4.51E-104	2.15E-103
LUAD (n=515)	MAD2L1	0.809158922	1.49E-120	1.15E-119
LUAD (n=515)	NUSAP1	0.798070965	6.10E-115	3.59E-114
LUAD (n=515)	RACGAP1	0.805752957	8.63E-119	6.16E-118
LUSC (n=501)	ESCO2	0.85966343	1.15E-147	1.28E-146
LUSC (n=501)	KIF4A	0.510129255	1.52E-34	2.62E-34
LUSC (n=501)	MAD2L1	0.576761375	9.24E-46	1.87E-45
LUSC (n=501)	NUSAP1	0.570605625	1.29E-44	2.48E-44
LUSC (n=501)	RACGAP1	0.599428203	3.40E-50	7.31E-50
MESO (n=87)	ESCO2	0.890519064	8.16E-31	1.35E-30
MESO (n=87)	KIF4A	0.844371947	9.33E-25	1.32E-24
MESO (n=87)	MAD2L1	0.827294598	5.35E-23	7.18E-23
MESO (n=87)	NUSAP1	0.793413283	5.09E-20	6.32E-20
MESO (n=87)	RACGAP1	0.835277393	8.54E-24	1.19E-23
OV (n=303)	ESCO2	0.880869762	8.90E-100	3.87E-99
OV (n=303)	KIF4A	0.589139539	1.06E-29	1.72E-29
OV (n=303)	MAD2L1	0.559415707	2.39E-26	3.49E-26
OV (n=303)	NUSAP1	0.568696531	2.33E-27	3.56E-27
OV (n=303)	RACGAP1	0.601102085	3.76E-31	6.27E-31
PAAD (n=179)	ESCO2	0.81860105	1.73E-44	3.30E-44
PAAD (n=179)	KIF4A	0.769114724	3.00E-36	5.30E-36
PAAD (n=179)	MAD2L1	0.800497981	3.31E-41	6.08E-41
PAAD (n=179)	NUSAP1	0.781170883	4.68E-38	8.42E-38
PAAD (n=179)	RACGAP1	0.707105643	1.93E-28	3.01E-28
PCPG (n=181)	ESCO2	0.817827292	8.02E-45	1.57E-44
PCPG (n=181)	KIF4A	0.700712363	4.77E-28	7.39E-28
PCPG (n=181)	MAD2L1	0.550885395	9.36E-16	1.13E-15
PCPG (n=181)	NUSAP1	0.82036711	2.58E-45	5.11E-45
PCPG (n=181)	RACGAP1	0.613368951	4.35E-20	5.44E-20
PRAD (n=498)	ESCO2	0.853845551	9.50E-143	9.50E-142
PRAD (n=498)	KIF4A	0.857035542	6.09E-145	6.41E-144
PRAD (n=498)	MAD2L1	0.713591494	1.10E-78	3.93E-78
PRAD (n=498)	NUSAP1	0.87145144	1.45E-155	1.94E-154
PRAD (n=498)	RACGAP1	0.784517589	5.27E-105	2.64E-104
READ (n=166)	ESCO2	0.908669845	4.22E-64	1.19E-63
READ (n=166)	KIF4A	0.44558375	1.79E-09	2.00E-09
READ (n=166)	MAD2L1	0.694658456	3.07E-25	4.38E-25
READ (n=166)	NUSAP1	0.642589083	1.04E-20	1.34E-20
READ (n=166)	RACGAP1	0.569502397	1.18E-15	1.40E-15
SARC (n=260)	ESCO2	0.891751926	7.96E-91	3.18E-90
SARC (n=260)	KIF4A	0.847909903	4.57E-73	1.50E-72
SARC (n=260)	MAD2L1	0.774191016	3.63E-53	8.24E-53
SARC (n=260)	NUSAP1	0.812319026	2.34E-62	6.32E-62
SARC (n=260)	RACGAP1	0.818067177	6.31E-64	1.73E-63
SKCM (n=471)	ESCO2	0.874585804	1.52E-149	1.79E-148
SKCM (n=471)	KIF4A	0.66471503	2.27E-61	5.90E-61
SKCM (n=471)	MAD2L1	0.726026144	2.72E-78	9.55E-78
SKCM (n=471)	NUSAP1	0.719707689	2.44E-76	8.26E-76
SKCM (n=471)	RACGAP1	0.704034353	1.01E-71	3.27E-71
SKCM-Metastasis (n=368)	ESCO2	0.856979532	2.07E-107	1.06E-106
SKCM-Metastasis (n=368)	KIF4A	0.645169532	1.07E-44	2.08E-44
SKCM-Metastasis (n=368)	MAD2L1	0.684038044	4.36E-52	9.68E-52
SKCM-Metastasis (n=368)	NUSAP1	0.683512716	5.58E-52	1.23E-51
SKCM-Metastasis (n=368)	RACGAP1	0.666483906	1.30E-48	2.68E-48
SKCM-Primary (n=103)	ESCO2	0.928875807	2.32E-45	4.63E-45
SKCM-Primary (n=103)	KIF4A	0.69663489	3.05E-16	3.70E-16
SKCM-Primary (n=103)	MAD2L1	0.831678601	1.48E-27	2.28E-27
SKCM-Primary (n=103)	NUSAP1	0.829372227	2.77E-27	4.20E-27
SKCM-Primary (n=103)	RACGAP1	0.791986996	2.26E-23	3.08E-23
STAD (n=415)	ESCO2	0.868899007	3.33E-128	2.90E-127
STAD (n=415)	KIF4A	0.66789057	6.16E-55	1.49E-54
STAD (n=415)	MAD2L1	0.769257633	2.30E-82	8.52E-82
STAD (n=415)	NUSAP1	0.710085492	6.58E-65	1.88E-64
STAD (n=415)	RACGAP1	0.66455286	3.23E-54	7.69E-54
TGCT (n=150)	ESCO2	0.835167785	2.93E-40	5.32E-40
TGCT (n=150)	KIF4A	0.109019956	0.184175286	0.186035643
TGCT (n=150)	MAD2L1	0.026541624	0.747146159	0.747146159
TGCT (n=150)	NUSAP1	0.678865727	1.34E-21	1.76E-21
TGCT (n=150)	RACGAP1	0.754197075	7.97E-29	1.27E-28
THCA (n=509)	ESCO2	0.796913627	4.65E-113	2.65E-112
THCA (n=509)	KIF4A	0.844481448	1.37E-139	1.31E-138
THCA (n=509)	MAD2L1	0.669557946	1.75E-67	5.30E-67
THCA (n=509)	NUSAP1	0.863807276	4.65E-153	5.81E-152
THCA (n=509)	RACGAP1	0.704378742	1.71E-77	5.91E-77
THYM (n=120)	ESCO2	0.930960483	1.83E-53	4.21E-53
THYM (n=120)	KIF4A	0.957531773	1.41E-65	4.16E-65
THYM (n=120)	MAD2L1	0.916855337	7.00E-49	1.47E-48
THYM (n=120)	NUSAP1	0.964122509	8.17E-70	2.59E-69
THYM (n=120)	RACGAP1	0.917528995	4.42E-49	9.40E-49
UCEC (n=545)	ESCO2	0.899468431	2.26E-197	5.65E-196
UCEC (n=545)	KIF4A	0.758730214	3.76E-103	1.75E-102
UCEC (n=545)	MAD2L1	0.793244041	4.41E-119	3.27E-118
UCEC (n=545)	NUSAP1	0.823824109	5.62E-136	5.11E-135
UCEC (n=545)	RACGAP1	0.769118899	1.19E-107	6.24E-107
UCS (n=57)	ESCO2	0.686673581	3.70E-09	4.09E-09
UCS (n=57)	KIF4A	0.092364532	0.49438529	0.496869639
UCS (n=57)	MAD2L1	0.252138968	0.058473724	0.059364186
UCS (n=57)	NUSAP1	0.309761473	0.019035686	0.019523781
UCS (n=57)	RACGAP1	0.266917293	0.044737726	0.045650741
UVM (n=80)	ESCO2	0.91371308	3.07E-32	5.17E-32
UVM (n=80)	KIF4A	0.595733708	5.57E-09	6.12E-09
UVM (n=80)	MAD2L1	0.750656353	1.08E-15	1.30E-15
UVM (n=80)	NUSAP1	0.837365213	3.72E-22	4.92E-22
UVM (n=80)	RACGAP1	0.814936796	3.65E-20	4.59E-20
