# Supplementary material for: PDZ Binding Kinase/T-LAK Cell-Derived Protein Kinase Plays an Oncogenic Role and Promotes Immune Escape in Human Tumors
Source: J Oncol. 2021 Sep 23;2021:8892479. doi: 10.1155/2021/8892479 (PMC8486520; doi:10.1155/2021/8892479)
Supplement: Supplementary Materials — Table S1: expression comparison of PBK/TOPK expression in tumor and normal tissues across cancers from TCGA and GTEx. Table S2: the correlation of PBK/TOPK expression with immune cells in TIMER2.0. Table S3: the correlation of PBK/TOPK expression with TMB across cancers from TCGA. Table S4: the correlation of PBK/TOPK expression with MSI across cancers from TCGA. Table S5: the correlation of PBK/TOPK expression with the expression of immune checkpoints genes across cancers from TCGA. Table S6: analysis of the correlation between PBK/TOPK expression and the immune response based on TIDE in KRIC, LGG, and LIHC. Table S7: the correlations of PBK/TOPK with DNA mismatch genes and methyltransferases. Table S8: similar genes of PBK/TOPK from GEPIA2. Table S9: the correlation of PBK/TOPK with top 5 similar genes from GEPIA2. Table S10: the result of Venn. Table S11: the GO and KEGG enrichment analysis of PBK/TOPK-related differentially genes in KIRC. Table S12: the GO and KEGG enrichment analysis of PBK/TOPK-related differentially genes in LGG. Table S13: the GO and KEGG enrichment analysis of PBK/TOPK-related differentially genes in LIHC. Table S14: Gene_outcome of PBK in the TIMER2.0 database. Figure S1: PBK mRNA expression based on the pathological stage and tumor grade of other cancers in TCGA. Click the link to download the supplements: (https://pan.baidu.com/s/1GFqYHhkAK0Y_34zLnH049g) (password 1234). [file 8892479.f1.zip › 8892479.f1/Table S10.txt]

Names	total	elements
Interacted correlated	2	CDK1
		CCNB1
Interacted	48	ZFP64
		DLG1
		OTP
		SHC2
		INPPL1
		SFN
		INS-IGF2
		TICAM2
		DOK4
		IGF1
		CBLB
		TP53
		MSL1
		YWHAH
		PTEN
		CHFR
		MAP2K4
		INS
		CBLC
		INADL
		MYD88
		YWHAG
		CASKIN2
		TRIM23
		FRMPD2
		MAP2K2
		ENSG00000272772
		H2AFX
		CRK
		CRKL
		MBP
		RHOBTB3
		USP5
		MAP2K5
		IGF2
		BPTF
		LNX1
		PDZD2
		BIRC6
		GRID2IP
		DLG5
		LGALS9B
		MAP2K1
		CBL
		SRC
		SHC4
		LRRC47
		YWHAE
correlated	98	TMPO
		KIAA1524
		ESCO2
		CENPA
		SKA3
		NCAPH
		CHEK1
		MELK
		CKAP2L
		KIF11
		MKI67
		CKAP2
		CEP55
		ARHGAP11A
		DTL
		RACGAP1
		TPX2
		POC1A
		KIF18B
		RRM2
		ZWINT
		SGOL1
		NDC80
		SHCBP1
		CDCA2
		FEN1
		CENPL
		CENPE
		ASPM
		LMNB1
		UBE2S
		H2AFZ
		FANCI
		PLK4
		OIP5
		HMMR
		CCNA2
		KIF4A
		TTK
		CDC25C
		GTSE1
		NCAPG2
		RFC3
		CDKN3
		PCNA
		BUB1
		NUF2
		NCAPG
		EXO1
		GINS1
		MCM6
		SPC25
		CENPI
		KIFC1
		SKA1
		ZWILCH
		PARPBP
		KPNA2
		KIF18A
		SPDL1
		NEK2
		DSCC1
		KIF15
		TROAP
		KIF2C
		BIRC5
		KIF20A
		CDCA5
		PLK1
		DBF4
		CENPO
		AURKA
		MCM10
		UBE2T
		FAM64A
		CENPF
		ORC6
		FBXO5
		NUSAP1
		SGOL2
		INCENP
		KIF14
		CKS2
		MND1
		TUBA1B
		LIN9
		TIMELESS
		MAD2L1
		FOXM1
		GSG2
		DLGAP5
		EZH2
		CCNB2
		KIF23
		DEPDC1
		HJURP
		PRC1
		CDCA8
