# Supplementary material for: PDZ Binding Kinase/T-LAK Cell-Derived Protein Kinase Plays an Oncogenic Role and Promotes Immune Escape in Human Tumors
Source: J Oncol. 2021 Sep 23;2021:8892479. doi: 10.1155/2021/8892479 (PMC8486520; doi:10.1155/2021/8892479)
Supplement: Supplementary Materials — Table S1: expression comparison of PBK/TOPK expression in tumor and normal tissues across cancers from TCGA and GTEx. Table S2: the correlation of PBK/TOPK expression with immune cells in TIMER2.0. Table S3: the correlation of PBK/TOPK expression with TMB across cancers from TCGA. Table S4: the correlation of PBK/TOPK expression with MSI across cancers from TCGA. Table S5: the correlation of PBK/TOPK expression with the expression of immune checkpoints genes across cancers from TCGA. Table S6: analysis of the correlation between PBK/TOPK expression and the immune response based on TIDE in KRIC, LGG, and LIHC. Table S7: the correlations of PBK/TOPK with DNA mismatch genes and methyltransferases. Table S8: similar genes of PBK/TOPK from GEPIA2. Table S9: the correlation of PBK/TOPK with top 5 similar genes from GEPIA2. Table S10: the result of Venn. Table S11: the GO and KEGG enrichment analysis of PBK/TOPK-related differentially genes in KIRC. Table S12: the GO and KEGG enrichment analysis of PBK/TOPK-related differentially genes in LGG. Table S13: the GO and KEGG enrichment analysis of PBK/TOPK-related differentially genes in LIHC. Table S14: Gene_outcome of PBK in the TIMER2.0 database. Figure S1: PBK mRNA expression based on the pathological stage and tumor grade of other cancers in TCGA. Click the link to download the supplements: (https://pan.baidu.com/s/1GFqYHhkAK0Y_34zLnH049g) (password 1234). [file 8892479.f1.zip › 8892479.f1/Table S14.txt]

PBK in ACC (n=79):
Model: Surv(OS, EVENT) ~ `PBK` 
79 patients with 28 dying ( 0 missing obs. )
     coef    HR se(coef) 95%CI_l 95%CI_u     z p signif
PBK 0.646 1.908    0.137   1.459   2.496 4.717 0    ***
Rsquare = 0.274 (max possible = 9.35e-01 )
Likelihood ratio test p = 4.85e-07 
Wald test p = 2.39e-06 
Score (logrank) test p = 5.77e-07 

PBK in BLCA (n=408):
Model: Surv(OS, EVENT) ~ `PBK` 
403 patients with 177 dying ( 5 missing obs. )
     coef    HR se(coef) 95%CI_l 95%CI_u     z     p signif
PBK 0.116 1.123    0.074   0.971   1.299 1.563 0.118       
Rsquare = 0.006 (max possible = 9.91e-01 )
Likelihood ratio test p = 1.17e-01 
Wald test p = 1.18e-01 
Score (logrank) test p = 1.18e-01 

PBK in BRCA (n=1100):
Model: Surv(OS, EVENT) ~ `PBK` 
1080 patients with 153 dying ( 20 missing obs. )
     coef    HR se(coef) 95%CI_l 95%CI_u     z     p signif
PBK 0.065 1.067    0.067   0.936   1.216 0.969 0.333       
Rsquare = 0.001 (max possible = 8e-01 )
Likelihood ratio test p = 3.33e-01 
Wald test p = 3.33e-01 
Score (logrank) test p = 3.33e-01 

PBK in BRCA-Basal (n=191):
Model: Surv(OS, EVENT) ~ `PBK` 
189 patients with 28 dying ( 2 missing obs. )
      coef    HR se(coef) 95%CI_l 95%CI_u    z     p signif
PBK -0.121 0.886    0.202   0.596   1.316 -0.6 0.548       
Rsquare = 0.002 (max possible = 7.17e-01 )
Likelihood ratio test p = 5.48e-01 
Wald test p = 5.48e-01 
Score (logrank) test p = 5.48e-01 

PBK in BRCA-Her2 (n=82):
Model: Surv(OS, EVENT) ~ `PBK` 
77 patients with 16 dying ( 5 missing obs. )
     coef   HR se(coef) 95%CI_l 95%CI_u     z     p signif
PBK 0.438 1.55    0.278   0.898   2.674 1.574 0.115       
Rsquare = 0.03 (max possible = 7.51e-01 )
Likelihood ratio test p = 1.25e-01 
Wald test p = 1.15e-01 
Score (logrank) test p = 1.11e-01 

PBK in BRCA-LumA (n=568):
Model: Surv(OS, EVENT) ~ `PBK` 
561 patients with 68 dying ( 7 missing obs. )
      coef    HR se(coef) 95%CI_l 95%CI_u      z     p signif
PBK -0.025 0.975    0.121    0.77   1.235 -0.207 0.836       
Rsquare = 0 (max possible = 6.93e-01 )
Likelihood ratio test p = 8.36e-01 
Wald test p = 8.36e-01 
Score (logrank) test p = 8.36e-01 

PBK in BRCA-LumB (n=219):
Model: Surv(OS, EVENT) ~ `PBK` 
214 patients with 34 dying ( 5 missing obs. )
    coef    HR se(coef) 95%CI_l 95%CI_u    z    p signif
PBK 0.17 1.185    0.197   0.805   1.745 0.86 0.39       
Rsquare = 0.003 (max possible = 7.19e-01 )
Likelihood ratio test p = 3.9e-01 
Wald test p = 3.9e-01 
Score (logrank) test p = 3.9e-01 

PBK in CESC (n=306):
Model: Surv(OS, EVENT) ~ `PBK` 
293 patients with 73 dying ( 13 missing obs. )
      coef    HR se(coef) 95%CI_l 95%CI_u      z     p signif
PBK -0.197 0.821    0.155   0.606   1.111 -1.277 0.202       
Rsquare = 0.006 (max possible = 9.11e-01 )
Likelihood ratio test p = 2.04e-01 
Wald test p = 2.02e-01 
Score (logrank) test p = 2.01e-01 

PBK in CHOL (n=36):
Model: Surv(OS, EVENT) ~ `PBK` 
36 patients with 18 dying ( 0 missing obs. )
     coef    HR se(coef) 95%CI_l 95%CI_u     z     p signif
PBK 0.537 1.712    0.263   1.023   2.864 2.047 0.041      *
Rsquare = 0.107 (max possible = 9.46e-01 )
Likelihood ratio test p = 4.31e-02 
Wald test p = 4.07e-02 
Score (logrank) test p = 4.03e-02 

PBK in COAD (n=458):
Model: Surv(OS, EVENT) ~ `PBK` 
435 patients with 95 dying ( 23 missing obs. )
      coef    HR se(coef) 95%CI_l 95%CI_u      z     p signif
PBK -0.187 0.829    0.093   0.691   0.995 -2.015 0.044      *
Rsquare = 0.009 (max possible = 9.02e-01 )
Likelihood ratio test p = 5.03e-02 
Wald test p = 4.39e-02 
Score (logrank) test p = 4.41e-02 

PBK in DLBC (n=48):
Model: Surv(OS, EVENT) ~ `PBK` 
47 patients with 9 dying ( 1 missing obs. )
      coef    HR se(coef) 95%CI_l 95%CI_u      z     p signif
PBK -0.504 0.604    0.387   0.283   1.289 -1.303 0.192       
Rsquare = 0.036 (max possible = 6.72e-01 )
Likelihood ratio test p = 1.91e-01 
Wald test p = 1.92e-01 
Score (logrank) test p = 1.86e-01 

PBK in ESCA (n=185):
Model: Surv(OS, EVENT) ~ `PBK` 
184 patients with 77 dying ( 1 missing obs. )
     coef    HR se(coef) 95%CI_l 95%CI_u     z     p signif
PBK 0.003 1.003    0.123   0.788   1.277 0.024 0.981       
Rsquare = 0 (max possible = 9.73e-01 )
Likelihood ratio test p = 9.81e-01 
Wald test p = 9.81e-01 
Score (logrank) test p = 9.81e-01 

PBK in GBM (n=153):
Model: Surv(OS, EVENT) ~ `PBK` 
150 patients with 120 dying ( 3 missing obs. )
     coef    HR se(coef) 95%CI_l 95%CI_u     z     p signif
PBK 0.103 1.109    0.088   0.934   1.316 1.179 0.238       
Rsquare = 0.01 (max possible = 9.98e-01 )
Likelihood ratio test p = 2.29e-01 
Wald test p = 2.38e-01 
Score (logrank) test p = 2.38e-01 

PBK in HNSC (n=522):
Model: Surv(OS, EVENT) ~ `PBK` 
521 patients with 222 dying ( 1 missing obs. )
      coef    HR se(coef) 95%CI_l 95%CI_u    z     p signif
PBK -0.007 0.993     0.07   0.866   1.139 -0.1 0.921       
Rsquare = 0 (max possible = 9.91e-01 )
Likelihood ratio test p = 9.21e-01 
Wald test p = 9.21e-01 
Score (logrank) test p = 9.21e-01 

PBK in HNSC-HPV+ (n=98):
Model: Surv(OS, EVENT) ~ `PBK` 
98 patients with 30 dying ( 0 missing obs. )
     coef    HR se(coef) 95%CI_l 95%CI_u     z     p signif
PBK -0.47 0.625    0.206   0.417   0.936 -2.28 0.023      *
Rsquare = 0.052 (max possible = 9.07e-01 )
Likelihood ratio test p = 2.28e-02 
Wald test p = 2.26e-02 
Score (logrank) test p = 2.14e-02 

PBK in HNSC-HPV- (n=422):
Model: Surv(OS, EVENT) ~ `PBK` 
421 patients with 192 dying ( 1 missing obs. )
     coef   HR se(coef) 95%CI_l 95%CI_u     z     p signif
PBK 0.122 1.13    0.081   0.964   1.325 1.507 0.132       
Rsquare = 0.005 (max possible = 9.92e-01 )
Likelihood ratio test p = 1.32e-01 
Wald test p = 1.32e-01 
Score (logrank) test p = 1.32e-01 

PBK in KICH (n=66):
Model: Surv(OS, EVENT) ~ `PBK` 
65 patients with 9 dying ( 1 missing obs. )
     coef    HR se(coef) 95%CI_l 95%CI_u     z p signif
PBK 0.773 2.166     0.18   1.521   3.084 4.285 0    ***
Rsquare = 0.198 (max possible = 6.61e-01 )
Likelihood ratio test p = 1.56e-04 
Wald test p = 1.82e-05 
Score (logrank) test p = 4.54e-07 

PBK in KIRC (n=533):
Model: Surv(OS, EVENT) ~ `PBK` 
529 patients with 173 dying ( 4 missing obs. )
     coef    HR se(coef) 95%CI_l 95%CI_u     z p signif
PBK 0.399 1.491      0.1   1.225   1.815 3.984 0    ***
Rsquare = 0.027 (max possible = 9.75e-01 )
Likelihood ratio test p = 1.24e-04 
Wald test p = 6.76e-05 
Score (logrank) test p = 7.46e-05 

PBK in KIRP (n=290):
Model: Surv(OS, EVENT) ~ `PBK` 
287 patients with 44 dying ( 3 missing obs. )
     coef    HR se(coef) 95%CI_l 95%CI_u     z p signif
PBK 0.843 2.324    0.132   1.795    3.01 6.395 0    ***
Rsquare = 0.11 (max possible = 7.69e-01 )
Likelihood ratio test p = 7.67e-09 
Wald test p = 1.6e-10 
Score (logrank) test p = 1.08e-11 

PBK in LAML (n=173):
Model: Surv(OS, EVENT) ~ `PBK` 
151 patients with 94 dying ( 22 missing obs. )
      coef    HR se(coef) 95%CI_l 95%CI_u      z     p signif
PBK -0.072 0.931    0.118   0.739   1.173 -0.607 0.544       
Rsquare = 0.002 (max possible = 9.96e-01 )
Likelihood ratio test p = 5.42e-01 
Wald test p = 5.44e-01 
Score (logrank) test p = 5.44e-01 

PBK in LGG (n=516):
Model: Surv(OS, EVENT) ~ `PBK` 
511 patients with 125 dying ( 5 missing obs. )
     coef   HR se(coef) 95%CI_l 95%CI_u    z p signif
PBK 0.392 1.48    0.061   1.312   1.669 6.38 0    ***
Rsquare = 0.075 (max possible = 9.13e-01 )
Likelihood ratio test p = 2.48e-10 
Wald test p = 1.77e-10 
Score (logrank) test p = 1.07e-10 

PBK in LIHC (n=371):
Model: Surv(OS, EVENT) ~ `PBK` 
364 patients with 130 dying ( 7 missing obs. )
     coef    HR se(coef) 95%CI_l 95%CI_u     z p signif
PBK 0.329 1.389    0.072   1.207   1.598 4.593 0    ***
Rsquare = 0.054 (max possible = 9.74e-01 )
Likelihood ratio test p = 6.44e-06 
Wald test p = 4.37e-06 
Score (logrank) test p = 3.37e-06 

PBK in LUAD (n=515):
Model: Surv(OS, EVENT) ~ `PBK` 
502 patients with 182 dying ( 13 missing obs. )
     coef    HR se(coef) 95%CI_l 95%CI_u     z p signif
PBK 0.216 1.241    0.057    1.11   1.387 3.796 0    ***
Rsquare = 0.028 (max possible = 9.79e-01 )
Likelihood ratio test p = 1.64e-04 
Wald test p = 1.47e-04 
Score (logrank) test p = 1.38e-04 

PBK in LUSC (n=501):
Model: Surv(OS, EVENT) ~ `PBK` 
493 patients with 211 dying ( 8 missing obs. )
      coef    HR se(coef) 95%CI_l 95%CI_u      z     p signif
PBK -0.091 0.913    0.075   0.788   1.057 -1.217 0.223       
Rsquare = 0.003 (max possible = 9.89e-01 )
Likelihood ratio test p = 2.26e-01 
Wald test p = 2.23e-01 
Score (logrank) test p = 2.23e-01 

PBK in MESO (n=87):
Model: Surv(OS, EVENT) ~ `PBK` 
86 patients with 73 dying ( 1 missing obs. )
     coef    HR se(coef) 95%CI_l 95%CI_u     z p signif
PBK 0.553 1.739    0.128   1.353   2.234 4.326 0    ***
Rsquare = 0.203 (max possible = 9.98e-01 )
Likelihood ratio test p = 9.93e-06 
Wald test p = 1.52e-05 
Score (logrank) test p = 1.31e-05 

PBK in OV (n=303):
Model: Surv(OS, EVENT) ~ `PBK` 
302 patients with 183 dying ( 1 missing obs. )
      coef    HR se(coef) 95%CI_l 95%CI_u      z     p signif
PBK -0.136 0.872    0.074   0.755   1.009 -1.843 0.065      ·
Rsquare = 0.011 (max possible = 9.97e-01 )
Likelihood ratio test p = 6.74e-02 
Wald test p = 6.54e-02 
Score (logrank) test p = 6.52e-02 

PBK in PAAD (n=179):
Model: Surv(OS, EVENT) ~ `PBK` 
178 patients with 93 dying ( 1 missing obs. )
     coef    HR se(coef) 95%CI_l 95%CI_u     z p signif
PBK 0.438 1.549    0.118   1.229   1.954 3.703 0    ***
Rsquare = 0.075 (max possible = 9.9e-01 )
Likelihood ratio test p = 2e-04 
Wald test p = 2.13e-04 
Score (logrank) test p = 2.11e-04 

PBK in PCPG (n=181):
Model: Surv(OS, EVENT) ~ `PBK` 
181 patients with 7 dying ( 0 missing obs. )
     coef    HR se(coef) 95%CI_l 95%CI_u     z     p signif
PBK 0.985 2.677    0.365   1.308   5.476 2.696 0.007     **
Rsquare = 0.037 (max possible = 2.89e-01 )
Likelihood ratio test p = 8.94e-03 
Wald test p = 7.02e-03 
Score (logrank) test p = 5.93e-03 

PBK in PRAD (n=498):
Model: Surv(OS, EVENT) ~ `PBK` 
496 patients with 10 dying ( 2 missing obs. )
     coef    HR se(coef) 95%CI_l 95%CI_u     z     p signif
PBK 0.376 1.456    0.305   0.801   2.646 1.234 0.217       
Rsquare = 0.003 (max possible = 1.68e-01 )
Likelihood ratio test p = 2.53e-01 
Wald test p = 2.17e-01 
Score (logrank) test p = 2.17e-01 

PBK in READ (n=166):
Model: Surv(OS, EVENT) ~ `PBK` 
157 patients with 27 dying ( 9 missing obs. )
      coef    HR se(coef) 95%CI_l 95%CI_u      z    p signif
PBK -0.275 0.759    0.201   0.512   1.126 -1.371 0.17       
Rsquare = 0.012 (max possible = 7.6e-01 )
Likelihood ratio test p = 1.74e-01 
Wald test p = 1.7e-01 
Score (logrank) test p = 1.7e-01 

PBK in SARC (n=260):
Model: Surv(OS, EVENT) ~ `PBK` 
257 patients with 99 dying ( 3 missing obs. )
     coef    HR se(coef) 95%CI_l 95%CI_u     z     p signif
PBK 0.201 1.222    0.083   1.038    1.44 2.406 0.016      *
Rsquare = 0.023 (max possible = 9.77e-01 )
Likelihood ratio test p = 1.48e-02 
Wald test p = 1.61e-02 
Score (logrank) test p = 1.59e-02 

PBK in SKCM (n=471):
Model: Surv(OS, EVENT) ~ `PBK` 
457 patients with 221 dying ( 14 missing obs. )
      coef    HR se(coef) 95%CI_l 95%CI_u     z    p signif
PBK -0.045 0.956    0.065   0.841   1.086 -0.69 0.49       
Rsquare = 0.001 (max possible = 9.93e-01 )
Likelihood ratio test p = 4.92e-01 
Wald test p = 4.9e-01 
Score (logrank) test p = 4.9e-01 

PBK in SKCM-Primary (n=103):
Model: Surv(OS, EVENT) ~ `PBK` 
99 patients with 28 dying ( 4 missing obs. )
    coef    HR se(coef) 95%CI_l 95%CI_u     z     p signif
PBK 0.08 1.083    0.134   0.832   1.409 0.594 0.553       
Rsquare = 0.004 (max possible = 8.73e-01 )
Likelihood ratio test p = 5.52e-01 
Wald test p = 5.53e-01 
Score (logrank) test p = 5.52e-01 

PBK in SKCM-Metastasis (n=368):
Model: Surv(OS, EVENT) ~ `PBK` 
358 patients with 193 dying ( 10 missing obs. )
      coef    HR se(coef) 95%CI_l 95%CI_u      z     p signif
PBK -0.012 0.988    0.074   0.855   1.142 -0.159 0.874       
Rsquare = 0 (max possible = 9.96e-01 )
Likelihood ratio test p = 8.74e-01 
Wald test p = 8.74e-01 
Score (logrank) test p = 8.74e-01 

PBK in STAD (n=415):
Model: Surv(OS, EVENT) ~ `PBK` 
385 patients with 158 dying ( 30 missing obs. )
      coef    HR se(coef) 95%CI_l 95%CI_u      z     p signif
PBK -0.085 0.918    0.068   0.804   1.049 -1.255 0.209       
Rsquare = 0.004 (max possible = 9.87e-01 )
Likelihood ratio test p = 2.12e-01 
Wald test p = 2.09e-01 
Score (logrank) test p = 2.09e-01 

PBK in TGCT (n=150):
Model: Surv(OS, EVENT) ~ `PBK` 
134 patients with 4 dying ( 16 missing obs. )
      coef    HR se(coef) 95%CI_l 95%CI_u      z     p signif
PBK -0.255 0.775    0.775    0.17   3.542 -0.329 0.742       
Rsquare = 0.001 (max possible = 2.08e-01 )
Likelihood ratio test p = 7.43e-01 
Wald test p = 7.42e-01 
Score (logrank) test p = 7.42e-01 

PBK in THCA (n=509):
Model: Surv(OS, EVENT) ~ `PBK` 
508 patients with 16 dying ( 1 missing obs. )
     coef    HR se(coef) 95%CI_l 95%CI_u     z     p signif
PBK 0.417 1.518     0.36   0.749   3.076 1.158 0.247       
Rsquare = 0.002 (max possible = 2.89e-01 )
Likelihood ratio test p = 2.71e-01 
Wald test p = 2.47e-01 
Score (logrank) test p = 2.45e-01 

PBK in THYM (n=120):
Model: Surv(OS, EVENT) ~ `PBK` 
119 patients with 9 dying ( 1 missing obs. )
      coef    HR se(coef) 95%CI_l 95%CI_u     z     p signif
PBK -0.591 0.554     0.24   0.346   0.887 -2.46 0.014      *
Rsquare = 0.049 (max possible = 4.39e-01 )
Likelihood ratio test p = 1.44e-02 
Wald test p = 1.39e-02 
Score (logrank) test p = 8.12e-03 

PBK in UCEC (n=545):
Model: Surv(OS, EVENT) ~ `PBK` 
542 patients with 90 dying ( 3 missing obs. )
     coef    HR se(coef) 95%CI_l 95%CI_u     z     p signif
PBK 0.145 1.156    0.093   0.964   1.387 1.569 0.117       
Rsquare = 0.005 (max possible = 8.44e-01 )
Likelihood ratio test p = 1.13e-01 
Wald test p = 1.17e-01 
Score (logrank) test p = 1.16e-01 

PBK in UCS (n=57):
Model: Surv(OS, EVENT) ~ `PBK` 
55 patients with 34 dying ( 2 missing obs. )
     coef    HR se(coef) 95%CI_l 95%CI_u     z     p signif
PBK 0.098 1.103    0.175   0.782   1.556 0.561 0.575       
Rsquare = 0.006 (max possible = 9.83e-01 )
Likelihood ratio test p = 5.77e-01 
Wald test p = 5.75e-01 
Score (logrank) test p = 5.75e-01 

PBK in UVM (n=80):
Model: Surv(OS, EVENT) ~ `PBK` 
80 patients with 23 dying ( 0 missing obs. )
     coef    HR se(coef) 95%CI_l 95%CI_u     z     p signif
PBK 0.514 1.671    0.279   0.968   2.887 1.842 0.065      ·
Rsquare = 0.042 (max possible = 8.74e-01 )
Likelihood ratio test p = 6.3e-02 
Wald test p = 6.54e-02 
Score (logrank) test p = 6.21e-02 
